# Supplementary material
Source: publisher site journal article supplement (https://www.spandidos-publications.com/3168/downloadSupplementary)
Supplement: Supplementary file 1 [file downloadSupplementary]

## Sheet: total profile
Table SII. mRNA microarray.
Index	Probe Set ID	Description	Gene Symbol	Genbank	UniGene ID	log ratio[D10 vs D2.5]	Regulation	p ([test] Vs [control])	Test group	Control group	M01_RD.txt	M04_RD.txt	M05_RD.txt	M10-1_RD.txt	M11-3_RD.txt	M12-1_RD.txt	Entrez ID	refseq	SwissProt Accession	UniGene Accession	UniGene Expression Information	GO Biological Process ID	GO Biological Process Term	GO Cellular Component ID	GO Cellular Component Term	GO Molecular Function ID	GO Molecular Function Term	pathway	ChromosomeNumber	start	stop	mRNA Source	mRNA Description	Protein Domains mRNA Accession	Protein Domains Source	crosshyb_type	category	apoptotic process	behavior	cell aging	cell activation	cell cycle	cell development	cell differentiation	cell division	cell growth	cell migration	cell proliferation	homeostatic process
1	17610302					0.386197	up	0.18033	3.67563	3.28943	2.84695	3.61119	3.41015	3.59941	3.80846	3.61901													chrUn	0	12105					1	main
2	17610314					-0.279378	down	0.462632	3.44374	3.72312	3.81157	3.28325	4.07452	3.10521	3.94053	3.28547													chr10	110999351	111000328	ENSEMBL	cdna:genscan chromosome:Rnor_6.0:10:111290285:111427070:1 transcript_biotype:protein_coding; cdna:genscan chromosome:Rnor_6.0:1:68954167:69138611:-1 transcript_biotype:protein_coding			3	main
3	17610316					0.0664523	up	0.751138	2.35152	2.28506	2.53787	1.96783	2.3495	2.15093	2.43614	2.46748													chr10	110738232	111641918	ENSEMBL	cdna:genscan chromosome:Rnor_6.0:10:111745037:111745915:1 transcript_biotype:protein_coding; cdna:genscan chromosome:Rnor_6.0:10:111631678:111734937:1 transcript_biotype:protein_coding			3	main
4	17610327					-0.0749801	down	0.41848	2.40697	2.48195	2.389	2.51776	2.5391	2.53787	2.37795	2.3051													chr1	322918	324388	ENSEMBL	cdna:genscan chromosome:Rnor_6.0:1:191904:354014:1 transcript_biotype:protein_coding; similar to vomeronasal 2, receptor, 11 [gene_biotype:protein_coding transcript_biotype:protein_coding]; cdna:genscan chromosome:Rnor_6.0:8:44647771:44748050:1 transcript_biotype:protein_coding; cdna:genscan chromosome:Rnor_6.0:10:111773071:112323867:1 transcript_biotype:protein_coding			3	main
5	17610330	vomeronasal 2 receptor, 2	Vom2r2		Rn.217623	0.0930671	up	0.722685	4.29882	4.20575	4.24957	4.10266	4.26503	4.19557	4.75434	3.94655	292438	NM_001099457///XM_008758230		NM_001099457									chr1	391729	401149	RefSeq	Rattus norvegicus vomeronasal 2 receptor, 2 (Vom2r2), mRNA.; PREDICTED: Rattus norvegicus vomeronasal type-2 receptor 26-like (LOC100911926), transcript variant X1, mRNA.			3	main
6	17610335	vomeronasal 2 receptor, 3; vomeronasal type-2 receptor 116-like	Vom2r3; LOC103690328		Rn.217622	-0.1897	down	0.280763	3.51337	3.70307	3.78627	3.89082	3.43211	3.40608	3.62277	3.51125	502213; 103690328	NM_001099460///XM_008758265	M0R883; F1LT54	NM_001099460		GO:0007186; GO:0007165	G-protein coupled receptor signaling pathway; signal transduction	GO:0005886; GO:0016021; GO:0016020	plasma membrane; integral component of membrane; membrane	GO:0004930; GO:0004871	G-protein coupled receptor activity; signal transducer activity		chr10	110737315	111299358	RefSeq; ENSEMBL	Rattus norvegicus vomeronasal 2 receptor, 3 (Vom2r3), mRNA.; PREDICTED: Rattus norvegicus vomeronasal type-2 receptor 116-like (LOC103690328), partial mRNA.; vomeronasal 2 receptor, 3 [gene_biotype:protein_coding transcript_biotype:protein_coding]; cdna:genscan chromosome:Rnor_6.0:1:394767:489904:1 transcript_biotype:protein_coding	ENSRNOT00000072186; ENSRNOT00000044187	Pfam	3	main
7	17610342	vomeronasal type-2 receptor 26-like	LOC100909608			0.167503	up	0.60898	2.41632	2.24881	2.26665	1.94568	2.53412	2.24748	2.09343	2.90803	100909608	XM_008758630///NM_001099462	M0R4U9			GO:0007186; GO:0007165	G-protein coupled receptor signaling pathway; signal transduction	GO:0005886; GO:0016021; GO:0016020	plasma membrane; integral component of membrane; membrane	GO:0004930; GO:0004871	G-protein coupled receptor activity; signal transducer activity		chr1	688298	696950	RefSeq; ENSEMBL	PREDICTED: Rattus norvegicus vomeronasal type-2 receptor 26-like (LOC100909608), mRNA.; vomeronasal type-2 receptor 26-like [gene_biotype:protein_coding transcript_biotype:protein_coding]; cdna:genscan chromosome:Rnor_6.0:1:699413:708065:1 transcript_biotype:protein_coding; Rattus norvegicus vomeronasal 2 receptor, 5 (Vom2r5), mRNA.; vomeronasal 2 receptor, 5 [gene_biotype:protein_coding transcri…	ENSRNOT00000072360	Pfam	1	main
8	17610349	vomeronasal 2 receptor, 6	Vom2r6		Rn.217639	0.175437	up	0.586913	2.77202	2.59658	2.34562	2.8287	2.61543	2.31262	2.7818	3.22163	308257	NM_001099459	D4A685	NM_001099459; ENSRNOT00000073546		GO:0007186; GO:0007165	G-protein coupled receptor signaling pathway; signal transduction	GO:0005886; GO:0016021; GO:0016020	plasma membrane; integral component of membrane; membrane	GO:0004930; GO:0004871	G-protein coupled receptor activity; signal transducer activity		chr1	733645	743681	RefSeq; ENSEMBL; NONCODE	Rattus norvegicus vomeronasal 2 receptor, 6 (Vom2r6), mRNA.; vomeronasal 2 receptor, 6 [gene_biotype:protein_coding transcript_biotype:protein_coding]; cdna:genscan chromosome:Rnor_6.0:1:715419:813517:-1 transcript_biotype:protein_coding; Non-coding transcript identified by NONCODE	ENSRNOT00000073546	Pfam	1	main
9	17610356	similar to Retinoic acid early inducible protein 1 delta precursor (RAE-1delta) [Source:RGD Symbol;Acc:1584760]	LOC679782			0.120308	up	0.330482	4.55566	4.43536	4.4099	4.44717	4.44899	4.39659	4.76163	4.50877			D3ZL40			GO:0001913; GO:0002474; GO:0042267; GO:0006955	T cell mediated cytotoxicity; antigen processing and presentation of peptide antigen via MHC class I; natural killer cell mediated cytotoxicity; immune response	GO:0005886	plasma membrane	GO:0042605; GO:0046703	peptide antigen binding; natural killer cell lectin-like receptor binding		chr1	3315932	3318139	ENSEMBL	similar to Retinoic acid early inducible protein 1 delta precursor (RAE-1delta) [gene_biotype:protein_coding transcript_biotype:protein_coding]; cdna:genscan chromosome:Rnor_6.0:1:1608113:1639147:1 transcript_biotype:protein_coding	ENSRNOT00000062030	Pfam	3	main
10	17610361					-0.543849	down	0.157978	2.75665	3.3005	3.18132	3.54297	3.1772	3.29451	2.30304	2.6724													chr1	2824760	2824881					3	main
11	17610363	retinoic acid early-inducible protein 1-gamma-like	LOC102547056			0.0310285	up	0.793821	2.37246	2.34144	2.52581	2.28848	2.21001	2.40905	2.25945	2.44889	102547056	XM_006227601///XM_008758631///XR_589834											chr1	2902736	2909605	RefSeq; ENSEMBL	PREDICTED: Rattus norvegicus retinoic acid early-inducible protein 1-gamma-like (LOC102547056), transcript variant X1, mRNA.; PREDICTED: Rattus norvegicus retinoic acid early-inducible protein 1-gamma-like (LOC102547056), transcript variant X2, mRNA.; PREDICTED: Rattus norvegicus retinoic acid early-inducible protein 1-gamma-like (LOC102547056), transcript variant X3, misc_RNA.; cdna:genscan chro…			1	main
12	17610368	vomeronasal 2 receptor, pseudogene 10	Vom2r-ps10		Rn.145806	0.000312133	up	0.97932	5.82475	5.82444	5.8346	5.81274	5.82599	5.82766	5.83932	5.80729	679775	XR_589890///NM_001099461///XM_008768512///XM_008758994///NM_001099457///NM_001099458///NM_001099459///XR_593844///XM_008758992///XM_008768518///NM_001099460///XM_008758230///XM_008758265///XM_008766125///XM_008766128///XM_008769911	M0R4Y3	NM_001099461; XM_008768512; ENSRNOT00000075323		GO:0007186; GO:0007165	G-protein coupled receptor signaling pathway; signal transduction	GO:0005886; GO:0016021; GO:0016020	plasma membrane; integral component of membrane; membrane	GO:0004930; GO:0004871	G-protein coupled receptor activity; signal transducer activity		chr10	110855175	111125630	RefSeq; ENSEMBL; NONCODE	PREDICTED: Rattus norvegicus vomeronasal 2 receptor, pseudogene 10 (Vom2r-ps10), misc_RNA.; Rattus norvegicus vomeronasal 2 receptor, 1 (Vom2r1), mRNA.; PREDICTED: Rattus norvegicus vomeronasal 2 receptor, 1 (Vom2r1), transcript variant X1, mRNA.; vomeronasal 2 receptor, 1 [gene_biotype:protein_coding transcript_biotype:protein_coding]; cdna:genscan chromosome:Rnor_6.0:10:111547190:111563104:-1 t…	ENSRNOT00000075323	Pfam	3	main
13	17610371	vomeronasal 2 receptor, pseudogene 10	Vom2r-ps10			-0.0802882	down	0.491737	4.03144	4.11173	3.95554	4.19189	4.18776	4.01641	4.16293	3.91499	679775	XR_589890///NM_001099460///XM_008758265											chr1	3296159	3297768	RefSeq; ENSEMBL; NONCODE	PREDICTED: Rattus norvegicus vomeronasal 2 receptor, pseudogene 10 (Vom2r-ps10), misc_RNA.; cdna:genscan chromosome:Rnor_6.0:1:1598521:1604530:-1 transcript_biotype:protein_coding; vomeronasal type-2 receptor 26-like [gene_biotype:protein_coding transcript_biotype:protein_coding]; Rattus norvegicus vomeronasal 2 receptor, 3 (Vom2r3), mRNA.; PREDICTED: Rattus norvegicus vomeronasal type-2 receptor…			3	main
14	17610374	vomeronasal 2 receptor, pseudogene 10	Vom2r-ps10			0.266097	up	0.274153	4.79566	4.52957	4.917	4.32113	4.35056	4.95208	4.7541	4.68081	679775	XR_589890											chr1	3296388	3302396	RefSeq; ENSEMBL	PREDICTED: Rattus norvegicus vomeronasal 2 receptor, pseudogene 10 (Vom2r-ps10), misc_RNA.; cdna:genscan chromosome:Rnor_6.0:1:1598521:1604530:-1 transcript_biotype:protein_coding			3	main
15	17610381					-0.0137013	down	0.879257	4.53353	4.54724	4.58884	4.43284	4.62003	4.41169	4.61181	4.57711													chr1	3010534	3094017					1	main
16	17610386					-0.833805	down	0.0874135	4.41204	5.24584	5.17892	5.20817	5.35043	4.84571	3.68369	4.70671													chrUn	0	6253					3	main
17	17610392					-0.0624455	down	0.728915	2.7316	2.79405	2.9029	2.64601	2.83322	2.45493	2.77208	2.9678													chrUn	0	122	ENSEMBL	Small nucleolar RNA SNORA32 [gene_biotype:snoRNA transcript_biotype:snoRNA]			3	main
18	17610394	retinoic acid early-inducible protein 1-alpha-like	LOC102548267			-0.0164817	down	0.938009	4.85255	4.86903	5.11716	4.68975	4.80018	5.10758	4.86974	4.58032	102548267	XR_589833	A0A0G2K5L0			GO:0006955	immune response						chrUn	0	3192	RefSeq; ENSEMBL	PREDICTED: Rattus norvegicus retinoic acid early-inducible protein 1-alpha-like (LOC102548267), ncRNA.; ensembl:novel chromosome:Rnor_6.0:1:1180932:1220916:1 gene:ENSRNOG00000061316 gene_biotype:protein_coding transcript_biotype:protein_coding; cdna:genscan chromosome:Rnor_6.0:1:1181301:1203543:1 transcript_biotype:protein_coding	ENSRNOT00000087443	Pfam	1	main
19	17610400	low density lipoprotein receptor-related protein 11	Lrp11		Rn.40930	-0.041224	down	0.68653	8.80787	8.84909	8.75997	8.88416	8.90316	8.94322	8.65503	8.82537	292462	NM_001106217	F1M753	NM_001106217; ENSRNOT00000019181	adrenal gland| brain| colon| connective tissue| dorsal root ganglion| embryonic tissue| eye| heart| kidney| liver| lung| ovary| pancreas| pineal gland| pituitary gland| placenta| small intestine| spleen| metamorphosing embryo| fetus| juvenile| adult	GO:0009408; GO:0009409; GO:0009414; GO:0009612; GO:0033555; GO:0035902; GO:0042594	response to heat; response to cold; response to water deprivation; response to mechanical stimulus; multicellular organismal response to stress; response to immobilization stress; response to starvation	GO:0016021; GO:0016020	integral component of membrane; membrane	GO:0051219	phosphoprotein binding		chr1	3400376	3428890	RefSeq; ENSEMBL; NONCODE	Rattus norvegicus low density lipoprotein receptor-related protein 11 (Lrp11), mRNA.; low density lipoprotein receptor-related protein 11 [gene_biotype:protein_coding transcript_biotype:protein_coding]; cdna:genscan chromosome:Rnor_6.0:1:1671896:1721839:1 transcript_biotype:protein_coding; Non-coding transcript identified by NONCODE	ENSRNOT00000019181	Pfam	1	main
20	17610410	large tumor suppressor kinase 1	Lats1		Rn.29152	-0.0242147	down	0.588683	8.23234	8.25655	8.28897	8.26347	8.21721	8.29943	8.17869	8.2189	308265	NM_001134543///XM_006227614	F1M2K4	NM_001134543; XM_006227614; ENSRNOT00000020098	brain| colon| embryonic tissue| eye| heart| kidney| liver| lung| ovary| pancreas| pineal gland| pituitary gland| placenta| prostate| thymus|tailbud embryo| metamorphosing embryo| fetus| juvenile| adult	GO:0000082; GO:0000086; GO:0000819; GO:0001827; GO:0001828; GO:0006468; GO:0007067; GO:0009755; GO:0018105; GO:0030216; GO:0030833; GO:0033138; GO:0034613; GO:0035329; GO:0043065; GO:0043254; GO:0045736; GO:0046620; GO:0051220; GO:0090090; GO:0016310	G1/S transition of mitotic cell cycle; G2/M transition of mitotic cell cycle; sister chromatid segregation; inner cell mass cell fate commitment; inner cell mass cellular morphogenesis; protein phosphorylation; mitotic nuclear division; hormone-mediated signaling pathway; peptidyl-serine phosphorylation; keratinocyte differentiation; regulation of actin filament polymerization; positive regulatio…	GO:0000922; GO:0005737	spindle pole; cytoplasm	GO:0000287; GO:0004674; GO:0005524; GO:0019901; GO:0000166; GO:0004672; GO:0016301; GO:0016740	magnesium ion binding; protein serine/threonine kinase activity; ATP binding; protein kinase binding; nucleotide binding; protein kinase activity; kinase activity; transferase activity		chr1	3503157	3511030	RefSeq; ENSEMBL; NONCODE	Rattus norvegicus large tumor suppressor kinase 1 (Lats1), mRNA.; PREDICTED: Rattus norvegicus large tumor suppressor kinase 1 (Lats1), transcript variant X1, mRNA.; large tumor suppressor kinase 1 [gene_biotype:protein_coding transcript_biotype:protein_coding]; cdna:genscan chromosome:Rnor_6.0:1:1771770:1867623:1 transcript_biotype:protein_coding; Non-coding transcript identified by NONCODE	ENSRNOT00000020098	Pfam	1	main					o	o	o
21	17610416					-0.0216161	down	0.735174	2.5082	2.52982	2.56149	2.54089	2.48707	2.49893	2.41737	2.60831													chr1	3521274	3522220	ENSEMBL	cdna:genscan chromosome:Rnor_6.0:1:1771770:1867623:1 transcript_biotype:protein_coding			1	main
22	17610419	katanin p60 (ATPase-containing) subunit A1	Katna1	AY621629|BC097929	Rn.47464	-0.0502614	down	0.723068	6.44904	6.4993	6.70827	6.37161	6.41803	6.56892	6.48043	6.29778	292464	NM_001004217	Q6E0V2; Z4YNM2	NM_001004217; ENSRNOT00000020417; AY621629; BC097929	adipose tissue| brain| connective tissue| embryonic tissue| liver| placenta| prostate| spleen| thymus| metamorphosing embryo| juvenile| adult	GO:0001578; GO:0001764; GO:0007067; GO:0008104; GO:0010977; GO:0016567; GO:0031122; GO:0051013; GO:0051301; GO:0007049; GO:0008152	microtubule bundle formation; neuron migration; mitotic nuclear division; protein localization; negative regulation of neuron projection development; protein ubiquitination; cytoplasmic microtubule organization; microtubule severing; cell division; cell cycle; metabolic process	GO:0000922; GO:0005634; GO:0005654; GO:0005737; GO:0005811; GO:0005813; GO:0005815; GO:0005819; GO:0005874; GO:0005886; GO:0030424; GO:0030426; GO:0030496; GO:0043025; GO:0005856	spindle pole; nucleus; nucleoplasm; cytoplasm; lipid particle; centrosome; microtubule organizing center; spindle; microtubule; plasma membrane; axon; growth cone; midbody; neuronal cell body; cytoskeleton	GO:0004842; GO:0005524; GO:0008017; GO:0008568; GO:0016887; GO:0045502; GO:0046982; GO:0000166; GO:0016787; GO:0005515	ubiquitin-protein transferase activity; ATP binding; microtubule binding; microtubule-severing ATPase activity; ATPase activity; dynein binding; protein heterodimerization activity; nucleotide binding; hydrolase activity; protein binding		chr1	3522927	3564344	RefSeq; ENSEMBL; GenBank; NONCODE	Rattus norvegicus katanin p60 (ATPase-containing) subunit A1 (Katna1), mRNA.; katanin p60 (ATPase-containing) subunit A1 [gene_biotype:protein_coding transcript_biotype:protein_coding]; Rattus norvegicus katanin mRNA, complete cds.; Rattus norvegicus katanin p60 (ATPase-containing) subunit A1, mRNA (cDNA clone MGC:116039 IMAGE:7444887), complete cds.; cdna:genscan chromosome:Rnor_6.0:1:1771770:18…	ENSRNOT00000020417	Pfam	1	main					o		o	o		o
23	17610432	peptidylprolyl isomerase (cyclophilin)-like 4	Ppil4		Rn.21237	-0.167606	down	0.42024	7.34449	7.51209	7.28131	7.7064	7.54857	7.06855	7.44543	7.51948	361449	NM_001108457///XM_006227621	D4AEG3	NM_001108457; XM_006227621; ENSRNOT00000021437	adipose tissue| brain| colon| embryonic tissue| eye| heart| kidney| lung| pancreas| pituitary gland| prostate|tailbud embryo| metamorphosing embryo| fetus| adult	GO:0000413; GO:0006457; GO:1901407	protein peptidyl-prolyl isomerization; protein folding; regulation of phosphorylation of RNA polymerase II C-terminal domain	GO:0005634	nucleus	GO:0000166; GO:0003755; GO:0044822; GO:0003676; GO:0016853	nucleotide binding; peptidyl-prolyl cis-trans isomerase activity; poly(A) RNA binding; nucleic acid binding; isomerase activity		chr1	3593965	3626926	RefSeq; ENSEMBL; NONCODE	Rattus norvegicus peptidylprolyl isomerase (cyclophilin)-like 4 (Ppil4), mRNA.; PREDICTED: Rattus norvegicus peptidylprolyl isomerase (cyclophilin)-like 4 (Ppil4), transcript variant X1, mRNA.; peptidylprolyl isomerase (cyclophilin)-like 4 [gene_biotype:protein_coding transcript_biotype:protein_coding]; cdna:genscan chromosome:Rnor_6.0:1:1897379:1942824:1 transcript_biotype:protein_coding; Non-co…	ENSRNOT00000021437	Pfam	1	main
24	17610448	zinc finger CCCH type containing 12D	Zc3h12d		Rn.102144	-0.16656	down	0.138019	5.63048	5.79704	5.76936	5.7273	5.89447	5.48323	5.72642	5.6818	308266	NM_001107469///XM_006227616	D4A0I4	NM_001107469; XM_006227616; ENSRNOT00000065646	connective tissue| ovary| small intestine| thymus| juvenile| adult	GO:0006402; GO:0030308; GO:0042130; GO:2000134	mRNA catabolic process; negative regulation of cell growth; negative regulation of T cell proliferation; negative regulation of G1/S transition of mitotic cell cycle	GO:0000932; GO:0005634; GO:0005737	cytoplasmic mRNA processing body; nucleus; cytoplasm	GO:0046872	metal ion binding		chr1	3635034	3669533	RefSeq; ENSEMBL; NONCODE	Rattus norvegicus zinc finger CCCH type containing 12D (Zc3h12d), mRNA.; PREDICTED: Rattus norvegicus zinc finger CCCH type containing 12D (Zc3h12d), transcript variant X1, mRNA.; zinc finger CCCH type containing 12D [gene_biotype:protein_coding transcript_biotype:protein_coding]; cdna:genscan chromosome:Rnor_6.0:1:1951218:1986223:1 transcript_biotype:protein_coding; cdna:genscan chromosome:Rnor_…	ENSRNOT00000065646	Pfam	1	main
25	17610457					0.438071	up	0.0599906	4.74402	4.30595	4.52742	4.08119	4.30925	4.89153	4.8081	4.53244													chr1	3972151	3972902	ENSEMBL	cdna:genscan chromosome:Rnor_6.0:1:2249254:2280090:1 transcript_biotype:protein_coding			1	main
26	17610460					0.438811	up	0.278155	6.77237	6.33355	6.06042	6.27756	6.66268	7.37717	6.46442	6.4755													chr1	4405901	4406005	ENSEMBL	U6 spliceosomal RNA [gene_biotype:snRNA transcript_biotype:snRNA]; cdna:genscan chromosome:Rnor_6.0:1:2712359:2722360:1 transcript_biotype:protein_coding			1	main
27	17610462					0.034045	up	0.749913	2.13782	2.10377	2.06697	2.14839	2.09596	2.33067	2.05625	2.02654													chr1	6392858	6392988	ENSEMBL	Small nucleolar RNA SNORA17 [gene_biotype:snoRNA transcript_biotype:snoRNA]			1	main
28	17610464	SNF2 histone linker PHD RING helicase, E3 ubiquitin protein ligase	Shprh		Rn.2515	-0.00405513	down	0.942831	7.9731	7.97716	8.02592	7.9321	7.97345	7.98344	8.04654	7.88934	308282	NM_001107470///XM_006227639///XM_008758609	D4A9B2; A0A0G2K1Q2	NM_001107470; XM_006227639; XM_008758609; ENSRNOT00000019893; ENSRNOT00000088292	adipose tissue| brain| dorsal root ganglion| embryonic tissue| kidney| lung| pituitary gland| prostate| thymus| metamorphosing embryo| juvenile| adult	GO:0000209; GO:0006334	protein polyubiquitination; nucleosome assembly	GO:0000786; GO:0005634	nucleosome; nucleus	GO:0003677; GO:0004386; GO:0004842; GO:0005524; GO:0008270; GO:0046872	DNA binding; helicase activity; ubiquitin-protein transferase activity; ATP binding; zinc ion binding; metal ion binding		chrUn	0	76115	RefSeq; ENSEMBL; NONCODE	Rattus norvegicus SNF2 histone linker PHD RING helicase, E3 ubiquitin protein ligase (Shprh), mRNA.; PREDICTED: Rattus norvegicus SNF2 histone linker PHD RING helicase, E3 ubiquitin protein ligase (Shprh), transcript variant X1, mRNA.; PREDICTED: Rattus norvegicus SNF2 histone linker PHD RING helicase, E3 ubiquitin protein ligase (Shprh), transcript variant X2, mRNA.; SNF2 histone linker PHD RING…	ENSRNOT00000019893; ENSRNOT00000088292	Pfam	1	main
29	17610500	F-box protein 30	Fbxo30	BC083823	Rn.204927	0.161259	up	0.0159468	7.36188	7.20062	7.17561	7.20047	7.22578	7.43682	7.32353	7.32528	308283	NM_001007690///XM_006227640	Q5XI67	NM_001007690; XM_006227640; ENSRNOT00000019918; BC083823	dorsal root ganglion| embryonic tissue| heart| kidney| liver| lung| placenta| prostate| spleen| testis|tailbud embryo| metamorphosing embryo| juvenile| adult	GO:0016567	protein ubiquitination			GO:0004842; GO:0008270; GO:0046872; GO:0061630	ubiquitin-protein transferase activity; zinc ion binding; metal ion binding; ubiquitin protein ligase activity		chr1	7018429	7039844	RefSeq; ENSEMBL; GenBank; NONCODE	Rattus norvegicus F-box protein 30 (Fbxo30), mRNA.; PREDICTED: Rattus norvegicus F-box protein 30 (Fbxo30), transcript variant X1, mRNA.; F-box protein 30 [gene_biotype:protein_coding transcript_biotype:protein_coding]; Rattus norvegicus F-box protein 30, mRNA (cDNA clone MGC:94907 IMAGE:7111792), complete cds.; cdna:genscan chromosome:Rnor_6.0:1:5372789:5387263:1 transcript_biotype:protein_codin…	ENSRNOT00000019918	Pfam	1	main
30	17610505	epilepsy, progressive myoclonus type 2A	Epm2a	AF347030	Rn.121954	0.0105892	up	0.932139	7.41003	7.39944	7.54449	7.45814	7.1957	7.34674	7.37134	7.51201	114005	NM_001276762	Q91XQ2	NM_001276762; ENSRNOT00000061930; AF347030	adult	GO:0005977; GO:0006470; GO:0006914; GO:0007399; GO:0016239; GO:0035335; GO:0046855; GO:0046959; GO:0005975; GO:0016311	glycogen metabolic process; protein dephosphorylation; autophagy; nervous system development; positive regulation of macroautophagy; peptidyl-tyrosine dephosphorylation; inositol phosphate dephosphorylation; habituation; carbohydrate metabolic process; dephosphorylation	GO:0005634; GO:0005737; GO:0005783; GO:0005829; GO:0005844	nucleus; cytoplasm; endoplasmic reticulum; cytosol; polysome	GO:0004439; GO:0004722; GO:0004725; GO:0008138; GO:0019203; GO:2001070; GO:0004721; GO:0016787; GO:0016791; GO:0030246; GO:0005515	phosphatidylinositol-4,5-bisphosphate 5-phosphatase activity; protein serine/threonine phosphatase activity; protein tyrosine phosphatase activity; protein tyrosine/serine/threonine phosphatase activity; carbohydrate phosphatase activity; starch binding; phosphoprotein phosphatase activity; hydrolase activity; phosphatase activity; carbohydrate binding; protein binding		chr1	7100639	7224740	RefSeq; ENSEMBL; GenBank	Rattus norvegicus epilepsy, progressive myoclonus type 2A (Epm2a), mRNA.; epilepsy, progressive myoclonus type 2A [gene_biotype:protein_coding transcript_biotype:protein_coding]; Rattus norvegicus dual-specificity phosphatase laforin (Epm2a) mRNA, partial cds.; cdna:genscan chromosome:Rnor_6.0:1:5553161:5563445:1 transcript_biotype:protein_coding	ENSRNOT00000061930	Pfam	1	main		o
31	17610510					0.147907	up	0.566509	2.7673	2.61939	2.59267	2.25527	3.01024	2.59811	2.91597	2.78781													chr1	7385881	7386010	ENSEMBL	Small nucleolar RNA SNORA17 [gene_biotype:snoRNA transcript_biotype:snoRNA]			3	main
32	17610512					0.0393357	up	0.817414	6.3457	6.30637	6.50102	6.18789	6.23018	6.58663	6.28833	6.16214													chr1	7684018	7684144	ENSEMBL	Small nucleolar RNA SNORA31 [gene_biotype:snoRNA transcript_biotype:snoRNA]			1	main
33	17610514					-0.107206	down	0.634111	2.66567	2.77287	2.52265	3.07328	2.72269	2.53598	2.53046	2.93056													chr1	8085259	8085448	ENSEMBL	Small nucleolar RNA SNORA73 family [gene_biotype:snoRNA transcript_biotype:snoRNA]			1	main
34	17610516					-0.148668	down	0.17226	4.55093	4.6996	4.62447	4.87233	4.602	4.58486	4.56038	4.50756													chrUn	0	94348					1	main
35	17610523	splicing factor 3b, subunit 5	Sf3b5		Rn.2083	0.0808827	up	0.439503	6.97386	6.89298	6.77621	6.96595	6.93677	6.88579	7.12004	6.91574	680891	NM_001126092	D4A5T1	NM_001126092; ENSRNOT00000019994	adrenal gland| brain| connective tissue| dorsal root ganglion| embryonic tissue| eye| heart| kidney| lung| ovary| pancreas| placenta| spleen| metamorphosing embryo| fetus| adult	GO:0000398; GO:0008150	mRNA splicing, via spliceosome; biological_process	GO:0005634; GO:0005654; GO:0005686; GO:0005689; GO:0071011; GO:0005575	nucleus; nucleoplasm; U2 snRNP; U12-type spliceosomal complex; precatalytic spliceosome; cellular_component	GO:0003674	molecular_function		chr1	8739573	8740285	RefSeq; ENSEMBL; NONCODE	Rattus norvegicus splicing factor 3b, subunit 5 (Sf3b5), mRNA.; splicing factor 3b, subunit 5 [gene_biotype:protein_coding transcript_biotype:protein_coding]; cdna:genscan chromosome:Rnor_6.0:1:7101860:7102120:1 transcript_biotype:protein_coding; Non-coding transcript identified by NONCODE	ENSRNOT00000019994	Pfam	1	main
36	17610527					0.0656892	up	0.846848	4.70167	4.63598	4.53549	4.97285	4.39959	4.17289	5.04093	4.89118													chr1	8808909	8809472					1	main
37	17610530	pleiomorphic adenoma gene-like 1	Plagl1	U72620	Rn.6977	0.192656	up	0.349988	6.6881	6.49544	6.6543	6.32772	6.50431	6.98359	6.62632	6.45438	25157	NM_012760	P70616	NM_012760; ENSRNOT00000030329; U72620	brain| colon| connective tissue| dorsal root ganglion| embryonic tissue| kidney| lung| pituitary gland| spleen|tailbud embryo| metamorphosing embryo| fetus| juvenile| adult	GO:0006366; GO:0010468; GO:0030154; GO:0035914; GO:0045944; GO:0006351; GO:0006357	transcription from RNA polymerase II promoter; regulation of gene expression; cell differentiation; skeletal muscle cell differentiation; positive regulation of transcription from RNA polymerase II promoter; transcription, DNA-templated; regulation of transcription from RNA polymerase II promoter	GO:0005634; GO:0005654; GO:0005794; GO:0043231	nucleus; nucleoplasm; Golgi apparatus; intracellular membrane-bounded organelle	GO:0000977; GO:0000981; GO:0001228; GO:0003677; GO:0046872; GO:0003676; GO:0003700; GO:0005515	RNA polymerase II regulatory region sequence-specific DNA binding; RNA polymerase II transcription factor activity, sequence-specific DNA binding; transcriptional activator activity, RNA polymerase II transcription regulatory region sequence-specific binding; DNA binding; metal ion binding; nucleic acid binding; transcription factor activity, sequence-specific DNA binding; protein binding		chr1	8857033	8897008	RefSeq; ENSEMBL; GenBank; NONCODE	Rattus norvegicus pleiomorphic adenoma gene-like 1 (Plagl1), mRNA.; pleiomorphic adenoma gene-like 1 [gene_biotype:protein_coding transcript_biotype:protein_coding]; Rattus norvegicus Lot1 mRNA, complete cds.; cdna:genscan chromosome:Rnor_6.0:1:7252547:7256343:1 transcript_biotype:protein_coding; Non-coding transcript identified by NONCODE	ENSRNOT00000030329	Pfam	1	main							o
38	17610541	fucosidase, alpha-L- 2, plasma	Fuca2	BC078933	Rn.47769	0.122573	up	0.202439	7.72716	7.60458	7.61796	7.69119	7.5046	7.60955	7.77112	7.80081	292485	NM_001004218	Q6AYS4	NM_001004218; ENSRNOT00000020946; BC078933	brain| colon| connective tissue| dorsal root ganglion| eye| heart| kidney| lung| pineal gland| prostate| spleen| testis| juvenile| adult	GO:0005975; GO:0006004; GO:0009617; GO:0016139; GO:2000535; GO:0008152	carbohydrate metabolic process; fucose metabolic process; response to bacterium; glycoside catabolic process; regulation of entry of bacterium into host cell; metabolic process	GO:0005615; GO:0070062; GO:0005576; GO:0005764	extracellular space; extracellular exosome; extracellular region; lysosome	GO:0004560; GO:0016787; GO:0016798; GO:0042806; GO:0005515	alpha-L-fucosidase activity; hydrolase activity; hydrolase activity, acting on glycosyl bonds; fucose binding; protein binding		chr1	9287057	9301801	RefSeq; ENSEMBL; GenBank; NONCODE	Rattus norvegicus fucosidase, alpha-L- 2, plasma (Fuca2), mRNA.; fucosidase, alpha-L- 2, plasma [gene_biotype:protein_coding transcript_biotype:protein_coding]; Rattus norvegicus fucosidase, alpha-L- 2, plasma, mRNA (cDNA clone MGC:93735 IMAGE:7107565), complete cds.; cdna:genscan chromosome:Rnor_6.0:1:7659008:7673493:1 transcript_biotype:protein_coding; Non-coding transcript identified by NONCODE	ENSRNOT00000020946	Pfam	1	main
39	17610551			BC158616		-0.109944	down	0.471782	7.61114	7.72109	7.86477	7.58014	7.71835	7.83346	7.48468	7.51529		NM_001115028											chrUn	0	14496	RefSeq; GenBank; ENSEMBL; NONCODE	Rattus norvegicus adenosine deaminase, tRNA-specific 2 (Adat2), mRNA.; Rattus norvegicus deaminase domain containing 1, mRNA (cDNA clone MGC:187499 IMAGE:7388507), complete cds.; adenosine deaminase, tRNA-specific 2 [gene_biotype:protein_coding transcript_biotype:protein_coding]; cdna:genscan chromosome:Rnor_6.0:1:7726529:7742484:1 transcript_biotype:protein_coding; Non-coding transcript identifi…			1	main
40	17610557	human immunodeficiency virus type I enhancer binding protein 2	Hivep2	D37951	Rn.9802	-0.0617083	down	0.663393	8.33955	8.40125	8.18776	8.43911	8.57689	8.27845	8.47096	8.26923	29721	NM_024137	Q00900; G3V7H8	NM_024137; ENSRNOT00000015131; D37951; OTTRNOT00000001811	brain| colon| connective tissue| lung| muscle| pituitary gland| prostate| metamorphosing embryo| fetus| juvenile| adult	GO:0006355; GO:0006366; GO:0007165; GO:0007275; GO:0006351	regulation of transcription, DNA-templated; transcription from RNA polymerase II promoter; signal transduction; multicellular organismal development; transcription, DNA-templated	GO:0005634; GO:0005654	nucleus; nucleoplasm	GO:0003676; GO:0003700; GO:0043565; GO:0044212; GO:0046872; GO:0003677	nucleic acid binding; transcription factor activity, sequence-specific DNA binding; sequence-specific DNA binding; transcription regulatory region DNA binding; metal ion binding; DNA binding		chrUn	0	249336	RefSeq; ENSEMBL; GenBank; Havana transcript; NONCODE	Rattus norvegicus human immunodeficiency virus type I enhancer binding protein 2 (Hivep2), mRNA.; human immunodeficiency virus type I enhancer binding protein 2 [gene_biotype:protein_coding transcript_biotype:protein_coding]; Rattus norvegicus mRNA for MIBP1 (c-myc intron binding protein 1), complete cds.; human immunodeficiency virus type I enhancer binding protein 2[gene_biotype:protein_coding …	OTTRNOT00000001811	Pfam	1	main
41	17610569					0.0577191	up	0.711988	2.67368	2.61596	2.62209	2.6857	2.5401	2.4287	2.91123	2.68112													chr1	10084824	10084919	NONCODE	Non-coding transcript identified by NONCODE			3	main
42	17610571	neuromedin B receptor [Source:RGD Symbol;Acc:3181]; neuromedin B receptor	Nmbr	U37058	Rn.89709	0.089369	up	0.545598	6.44874	6.35937	6.22795	6.28333	6.56683	6.3007	6.59761	6.44792	25264	NM_012799	A0A096MJ45; P24053	OTTRNOT00000001404		GO:0007186; GO:0031989; GO:0007218; GO:0007165	G-protein coupled receptor signaling pathway; bombesin receptor signaling pathway; neuropeptide signaling pathway; signal transduction	GO:0016021; GO:0016020; GO:0005737; GO:0005886	integral component of membrane; membrane; cytoplasm; plasma membrane	GO:0004930; GO:0004946; GO:0008188; GO:0004871	G-protein coupled receptor activity; bombesin receptor activity; neuropeptide receptor activity; signal transducer activity	OTTRNOT00000001404 // GenMAPP // GPCRDB_Class_A_Rhodopsin-like///OTTRNOT00000001404 // GenMAPP // Peptide_GPCRs	chrUn	0	13132	ENSEMBL; Havana transcript; RefSeq; GenBank; NONCODE	neuromedin B receptor [gene_biotype:protein_coding transcript_biotype:protein_coding]; neuromedin B receptor[gene_biotype:protein_coding transcript_biotype:protein_coding]; cdna:genscan chromosome:Rnor_6.0:1:8933407:8972134:1 transcript_biotype:protein_coding; Rattus norvegicus neuromedin B receptor (Nmbr), mRNA.; Rattus norvegicus neuromedin-B receptor mRNA, complete cds.; Non-coding transcript …	ENSRNOT00000076049; OTTRNOT00000001404	Pfam	1	main
43	17610576					-0.138759	down	0.715963	4.68918	4.82794	4.93268	4.37551	5.17562	4.24998	4.65276	5.16479													chr1	10816661	10816791	ENSEMBL	Small nucleolar RNA SNORA17 [gene_biotype:snoRNA transcript_biotype:snoRNA]			1	main
44	17610578					-0.0675912	down	0.711651	2.5204	2.58799	2.82014	2.48616	2.45769	2.36673	2.42802	2.76646													chr1	11805954	11806018	ENSEMBL	U7 small nuclear RNA [gene_biotype:snRNA transcript_biotype:snRNA]			3	main
45	17610580					-0.462775	down	0.110535	3.66734	4.13012	4.38295	3.92146	4.08595	3.46479	3.50706	4.03018													chr1	11807765	11807826	ENSEMBL	U7 small nuclear RNA [gene_biotype:snRNA transcript_biotype:snRNA]			3	main
46	17610582	Cbp/p300-interacting transactivator, with Glu/Asp-rich carboxy-terminal domain, 2	Cited2	AF361476|BC087005	Rn.31765	-0.158067	down	0.234258	8.29103	8.44909	8.52831	8.44962	8.36935	8.29445	8.11058	8.46805	114490	NM_053698	Q99MA1	NM_053698; ENSRNOT00000086790; AF361476; BC087005	brain| connective tissue| embryonic tissue| eye| heart| kidney| liver| lung| muscle| ovary| pineal gland| pituitary gland| placenta| prostate| spleen| thymus| vibrissa| metamorphosing embryo| fetus| juvenile| adult			GO:0000790; GO:0005634; GO:0005737; GO:0005575	nuclear chromatin; nucleus; cytoplasm; cellular_component	GO:0001102; GO:0001105; GO:0001106; GO:0003682; GO:0003700; GO:0003713; GO:0003714; GO:0035035; GO:0046332; GO:0050693; GO:0003674; GO:0005515	RNA polymerase II activating transcription factor binding; RNA polymerase II transcription coactivator activity; RNA polymerase II transcription corepressor activity; chromatin binding; transcription factor activity, sequence-specific DNA binding; transcription coactivator activity; transcription corepressor activity; histone acetyltransferase binding; SMAD binding; LBD domain binding; molecular_…		chr1	14515629	14518072	RefSeq; ENSEMBL; GenBank; NONCODE	Rattus norvegicus Cbp/p300-interacting transactivator, with Glu/Asp-rich carboxy-terminal domain, 2 (Cited2), mRNA.; Cbp/p300-interacting transactivator, with Glu/Asp-rich carboxy-terminal domain, 2 [gene_biotype:protein_coding transcript_biotype:protein_coding]; Rattus norvegicus transcription factor MRG1 mRNA, complete cds.; Rattus norvegicus Cbp/p300-interacting transactivator, with Glu/Asp-ri…	ENSRNOT00000086790	Pfam	1	main			o			o	o				o	o
47	17610586	taxilin beta	Txlnb		Rn.165855	-0.0532878	down	0.62846	5.19819	5.25148	5.33101	5.11485	5.30859	5.04779	5.27819	5.2686	308622	NM_001135859///XM_006227657	A0A0G2K2T1	NM_001135859; XM_006227657; ENSRNOT00000089066	eye| heart| lung| muscle| juvenile| adult			GO:0005737	cytoplasm	GO:0019905; GO:0005515	syntaxin binding; protein binding		chr1	14609470	14655258	RefSeq; ENSEMBL	Rattus norvegicus taxilin beta (Txlnb), mRNA.; PREDICTED: Rattus norvegicus taxilin beta (Txlnb), transcript variant X1, mRNA.; taxilin beta [gene_biotype:protein_coding transcript_biotype:protein_coding]; cdna:genscan chromosome:Rnor_6.0:1:12957783:12959861:1 transcript_biotype:protein_coding; cdna:genscan chromosome:Rnor_6.0:1:12919018:12944512:1 transcript_biotype:protein_coding	ENSRNOT00000089066	Pfam	1	main
48	17610597					0.142255	up	0.691623	4.40862	4.26637	3.72658	4.85923	4.2133	4.45653	4.28968	4.47966													chr1	14700569	14702244	ENSEMBL	cdna:genscan chromosome:Rnor_6.0:1:13006922:13012947:1 transcript_biotype:protein_coding			1	main
49	17610600					-0.0375358	down	0.820923	5.28169	5.31923	5.09463	5.36352	5.49954	5.0884	5.33483	5.42185													chrUn	0	913093					1	main
50	17610611	RALBP1 associated Eps domain containing 1	Reps1		Rn.12867	0.0365016	up	0.703379	7.79576	7.75926	7.74226	7.7381	7.7974	7.82972	7.92681	7.63074	292944	NM_001106264///XM_008758664	A0A0G2KB70; A0A0G2JZY3	NM_001106264	colon| connective tissue| embryonic tissue| eye| liver| lung| ovary| pancreas| placenta| prostate| spleen| thymus| fetus| juvenile| adult			GO:0005886; GO:0005905	plasma membrane; coated pit	GO:0005509; GO:0005515; GO:0017124	calcium ion binding; protein binding; SH3 domain binding		chrUn	0	78374	RefSeq; ENSEMBL; NONCODE	Rattus norvegicus RALBP1 associated Eps domain containing 1 (Reps1), mRNA.; RALBP1 associated Eps domain containing 1 [gene_biotype:protein_coding transcript_biotype:protein_coding]; ensembl:novel chromosome:Rnor_6.0:1:11766992:11772215:1 gene:ENSRNOG00000060990 gene_biotype:lincRNA transcript_biotype:lincRNA; cdna:genscan chromosome:Rnor_6.0:1:13250365:13298706:1 transcript_biotype:protein_codin…			1	main
51	17610635	NHS-like 1	Nhsl1			-0.185067	down	0.00957511	7.46982	7.65489	7.70365	7.6798	7.58122	7.44386	7.48585	7.47976	308631	XM_002725449///XM_002725450///XM_002728625///XM_002728626///XM_006222831///XM_006222833///XM_006222834///XM_006227668///XM_006227670///XM_006227671	A0A0G2JZL4										chrUn	0	244505	RefSeq; ENSEMBL	PREDICTED: Rattus norvegicus NHS-like 1 (Nhsl1), transcript variant X3, mRNA.; PREDICTED: Rattus norvegicus NHS-like 1 (Nhsl1), transcript variant X2, mRNA.; PREDICTED: Rattus norvegicus NHS-like 1 (Nhsl1), transcript variant X1, mRNA.; PREDICTED: Rattus norvegicus NHS-like 1 (Nhsl1), transcript variant X4, mRNA.; PREDICTED: Rattus norvegicus NHS-like 1 (Nhsl1), transcript variant X5, mRNA.; PRED…	ENSRNOT00000079250	Pfam	1	main
52	17610647	PERP, TP53 apoptosis effector	Perp	BC166608	Rn.101762	0.0708562	up	0.576205	6.99406	6.9232	6.79137	7.01929	6.95894	7.10785	7.06804	6.80628	292949	NM_001106265	B2GVC0	NM_001106265; ENSRNOT00000016037; BC166608	colon| eye| heart| kidney| liver| lung| placenta| prostate| small intestine| spleen|tailbud embryo| juvenile| adult	GO:0002934; GO:0007219; GO:0034113; GO:0045862; GO:0072332; GO:0097186; GO:0097202; GO:0098609	desmosome organization; Notch signaling pathway; heterotypic cell-cell adhesion; positive regulation of proteolysis; intrinsic apoptotic signaling pathway by p53 class mediator; amelogenesis; activation of cysteine-type endopeptidase activity; cell-cell adhesion	GO:0005739; GO:0005794; GO:0005887; GO:0030054; GO:0016020; GO:0016021	mitochondrion; Golgi apparatus; integral component of plasma membrane; cell junction; membrane; integral component of membrane				chr1	15786756	15799202	RefSeq; ENSEMBL; GenBank; NONCODE	Rattus norvegicus PERP, TP53 apoptosis effector (Perp), mRNA.; PERP, TP53 apoptosis effector [gene_biotype:protein_coding transcript_biotype:protein_coding]; Rattus norvegicus PERP, TP53 apoptosis effector, mRNA (cDNA clone MGC:188392 IMAGE:5599021), complete cds.; cdna:genscan chromosome:Rnor_6.0:1:14224496:14237207:1 transcript_biotype:protein_coding; Non-coding transcript identified by NONCODE	ENSRNOT00000016037	Pfam	1	main	o
53	17610653					-0.260305	down	0.641459	3.89398	4.15428	3.44512	4.74423	4.27349	4.37899	3.21019	4.09276													chr1	16041966	16042523	ENSEMBL	cdna:genscan chromosome:Rnor_6.0:1:14491561:14499678:1 transcript_biotype:protein_coding			1	main
54	17610655	oligodendrocyte transcription factor 3	Olig3		Rn.140572	0.0743281	up	0.637087	5.0327	4.95837	4.84148	4.79348	5.24015	5.09549	4.97465	5.02796	293012	NM_001106269	D4A572	NM_001106269; ENSRNOT00000016048		GO:0000122; GO:0010468; GO:0021520; GO:0021522; GO:0097476; GO:0006355	negative regulation of transcription from RNA polymerase II promoter; regulation of gene expression; spinal cord motor neuron cell fate specification; spinal cord motor neuron differentiation; spinal cord motor neuron migration; regulation of transcription, DNA-templated			GO:0001106; GO:0046983; GO:0005515	RNA polymerase II transcription corepressor activity; protein dimerization activity; protein binding		chr1	16343568	16345637	RefSeq; ENSEMBL	Rattus norvegicus oligodendrocyte transcription factor 3 (Olig3), mRNA.; oligodendrocyte transcription factor 3 [gene_biotype:protein_coding transcript_biotype:protein_coding]; cdna:genscan chromosome:Rnor_6.0:1:14754649:14814235:1 transcript_biotype:protein_coding	ENSRNOT00000016048	Pfam	1	main							o			o
55	17610659	interferon gamma receptor 1	Ifngr1	AF201901|BC062039|FQ217040	Rn.19927	0.16323	up	0.0246449	7.60543	7.4422	7.3845	7.44372	7.49838	7.60458	7.66277	7.54894	116465	NM_053783	Q6P6T3; P70599; Q9QZ62	NM_053783; ENSRNOT00000016286; AF201901; BC062039; FQ217040	adipose tissue| adrenal gland| brain| colon| connective tissue| embryonic tissue| eye| heart| kidney| liver| lung| muscle| pancreas| placenta| prostate| spleen| thymus| juvenile| adult	GO:0008150; GO:0019221	biological_process; cytokine-mediated signaling pathway	GO:0005783; GO:0014069; GO:0016021; GO:0030425; GO:0031982; GO:0016020; GO:0005886	endoplasmic reticulum; postsynaptic density; integral component of membrane; dendrite; vesicle; membrane; plasma membrane	GO:0019955; GO:0003674; GO:0004896	cytokine binding; molecular_function; cytokine receptor activity		chr1	16607955	16626390	RefSeq; ENSEMBL; GenBank; NONCODE	Rattus norvegicus interferon gamma receptor 1 (Ifngr1), mRNA.; interferon gamma receptor 1 [gene_biotype:protein_coding transcript_biotype:protein_coding]; Rattus norvegicus interferon-gamma receptor mRNA, complete cds.; Rattus norvegicus interferon gamma receptor 1, mRNA (cDNA clone MGC:72347 IMAGE:5598500), complete cds.; cdna:genscan chromosome:Rnor_6.0:1:14993942:15072296:1 transcript_biotype…	ENSRNOT00000016286	Pfam	1	main
56	17610669	interleukin 22 receptor, alpha 2	Il22ra2	AJ555485	Rn.13127	-0.157734	down	0.329332	5.60108	5.75882	5.96852	5.76781	5.54013	5.69978	5.63755	5.46593	444986	NM_001003404///XM_006227664	Q7TNI4	NM_001003404; XM_006227664; ENSRNOT00000016354; AJ555485	brain| placenta| prostate| adult	GO:0019221; GO:0042516; GO:0050728	cytokine-mediated signaling pathway; regulation of tyrosine phosphorylation of Stat3 protein; negative regulation of inflammatory response	GO:0005576; GO:0005829; GO:0005886; GO:0016021	extracellular region; cytosol; plasma membrane; integral component of membrane	GO:0042017; GO:0042018; GO:0005515	interleukin-22 binding; interleukin-22 receptor activity; protein binding		chr1	16641825	16655187	RefSeq; ENSEMBL; GenBank; NONCODE	Rattus norvegicus interleukin 22 receptor, alpha 2 (Il22ra2), mRNA.; PREDICTED: Rattus norvegicus interleukin 22 receptor, alpha 2 (Il22ra2), transcript variant X1, mRNA.; interleukin 22 receptor, alpha 2 [gene_biotype:protein_coding transcript_biotype:protein_coding]; Rattus norvegicus mRNA for cytokine receptor family II soluble 1 precursor (crf2-s1 gene).; cdna:genscan chromosome:Rnor_6.0:1:15…	ENSRNOT00000016354	Pfam	1	main
57	17610677	interleukin 20 receptor, alpha	Il20ra		Rn.162399	0.0985026	up	0.362973	4.45883	4.36033	4.25433	4.34669	4.47996	4.56067	4.32414	4.49168	308716	NM_001107521	D3ZJZ2	NM_001107521; ENSRNOT00000050656	colon| fetus	GO:0019221; GO:0045124; GO:2001244	cytokine-mediated signaling pathway; regulation of bone resorption; positive regulation of intrinsic apoptotic signaling pathway	GO:0005886; GO:0016021; GO:0016020	plasma membrane; integral component of membrane; membrane	GO:0004896; GO:0042015	cytokine receptor activity; interleukin-20 binding		chr1	16728324	16770911	RefSeq; ENSEMBL; NONCODE	Rattus norvegicus interleukin 20 receptor, alpha (Il20ra), mRNA.; interleukin 20 receptor, alpha [gene_biotype:protein_coding transcript_biotype:protein_coding]; cdna:genscan chromosome:Rnor_6.0:1:15180378:15255844:1 transcript_biotype:protein_coding; Non-coding transcript identified by NONCODE	ENSRNOT00000050656	Pfam	1	main
58	17610687					0.353734	up	0.182388	5.59674	5.24301	5.31002	5.33652	5.08248	5.35604	5.4314	6.00278													chr1	16788304	16788821	ENSEMBL	cdna:genscan chromosome:Rnor_6.0:1:15180378:15255844:1 transcript_biotype:protein_coding			1	main
59	17610691	mitogen-activated protein kinase kinase kinase 5	Map3k5		Rn.232064	-0.0305028	down	0.622199	6.01915	6.04966	6.13416	6.01957	5.99524	6.01221	6.08806	5.95719	365057	NM_001277694///XM_008758622	D3ZZH6; D3ZW27	NM_001277694; XM_008758622; ENSRNOT00000051496; ENSRNOT00000067070	pancreas| adult	GO:0000165; GO:0000186; GO:0000187; GO:0001934; GO:0002931; GO:0006468; GO:0007254; GO:0008631; GO:0010941; GO:0034976; GO:0038066; GO:0043065; GO:0043280; GO:0043507; GO:0045663; GO:0046330; GO:0070059; GO:0070301; GO:0097300; GO:1901216; GO:1902170; GO:0016310	MAPK cascade; activation of MAPKK activity; activation of MAPK activity; positive regulation of protein phosphorylation; response to ischemia; protein phosphorylation; JNK cascade; intrinsic apoptotic signaling pathway in response to oxidative stress; regulation of cell death; response to endoplasmic reticulum stress; p38MAPK cascade; positive regulation of apoptotic process; positive regulation …	GO:0005622; GO:1902911; GO:1990604	intracellular; protein kinase complex; IRE1-TRAF2-ASK1 complex	GO:0000287; GO:0004672; GO:0004709; GO:0005515; GO:0005524; GO:0019901; GO:0019903; GO:0042803; GO:0000166; GO:0016301; GO:0016740	magnesium ion binding; protein kinase activity; MAP kinase kinase kinase activity; protein binding; ATP binding; protein kinase binding; protein phosphatase binding; protein homodimerization activity; nucleotide binding; kinase activity; transferase activity		chrUn	0	207250	RefSeq; ENSEMBL	Rattus norvegicus mitogen-activated protein kinase kinase kinase 5 (Map3k5), mRNA.; PREDICTED: Rattus norvegicus mitogen-activated protein kinase kinase kinase 5 (Map3k5), transcript variant X1, mRNA.; mitogen-activated protein kinase kinase kinase 5 [gene_biotype:protein_coding transcript_biotype:protein_coding]; cdna:genscan chromosome:Rnor_6.0:1:15412603:15613752:1 transcript_biotype:protein_c…	ENSRNOT00000051496; ENSRNOT00000067070	Pfam	1	main	o
60	17610750	microtubule-associated protein 7	Map7		Rn.23807	-0.29243	down	0.255198	8.78263	9.07506	9.39144	8.98304	8.85071	8.48672	8.90669	8.95449	293016	NM_001106270///NM_001198638	A0A0G2KB52; F1MA82	NM_001106270; NM_001198638; ENSRNOT00000017401; ENSRNOT00000079845	adrenal gland| brain| dorsal root ganglion| eye| kidney| pancreas| pineal gland| placenta| prostate| small intestine| testis| juvenile| adult	GO:0000226; GO:0000902; GO:0001578; GO:0006687; GO:0006970; GO:0006997; GO:0007281; GO:0007283; GO:0008283; GO:0009566; GO:0032526; GO:0033327; GO:0035265; GO:0048872; GO:0060009; GO:0072659	microtubule cytoskeleton organization; cell morphogenesis; microtubule bundle formation; glycosphingolipid metabolic process; response to osmotic stress; nucleus organization; germ cell development; spermatogenesis; cell proliferation; fertilization; response to retinoic acid; Leydig cell differentiation; organ growth; homeostasis of number of cells; Sertoli cell development; protein localization…	GO:0005737; GO:0005886; GO:0015630; GO:0005874	cytoplasm; plasma membrane; microtubule cytoskeleton; microtubule	GO:0005102; GO:0005198	receptor binding; structural molecule activity		chrUn	0	133738	RefSeq; ENSEMBL; NONCODE	Rattus norvegicus microtubule-associated protein 7 (Map7), transcript variant 1, mRNA.; Rattus norvegicus microtubule-associated protein 7 (Map7), transcript variant 2, mRNA.; microtubule-associated protein 7 [gene_biotype:protein_coding transcript_biotype:protein_coding]; cdna:genscan chromosome:Rnor_6.0:1:15703914:15745303:1 transcript_biotype:protein_coding; cdna:genscan chromosome:Rnor_6.0:1:…	ENSRNOT00000017401; ENSRNOT00000079845	Pfam	1	main						o	o				o	o
61	17610773					1.08274	up	0.0029014	3.94613	2.86339	2.69841	2.92024	2.97151	4.15601	4.0124	3.66998													chr1	17323877	17323983	ENSEMBL	U6 spliceosomal RNA [gene_biotype:snRNA transcript_biotype:snRNA]			3	main
62	17610775	BCL2-associated transcription factor 1	Bclaf1	BC161968	Rn.15652; Rn.202401	0.0150643	up	0.824604	9.04551	9.03045	9.03776	9.02353	9.03006	9.17259	8.98253	8.98141	293017	NM_001047852///XM_006227652///XM_006227653///XM_006227654///XM_006227655///XM_006227656///XM_008758605///XR_349832	B0K035; B1WC16; A0A0G2K1G0; A0A0G2K2S3	NM_001047852; XM_006227652; XM_006227653; XM_006227654; XM_006227655; XM_006227656; XM_008758605; XR_349832; BC161968; ENSRNOT00000078589; ENSRNOT00000088025; ENSRNOT00000089966	adipose tissue| adrenal gland| brain| connective tissue| dorsal root ganglion| embryonic tissue| eye| heart| kidney| liver| lung| ovary| pancreas| pituitary gland| placenta| prostate| spleen| thymus|tailbud embryo| metamorphosing embryo| fetus| juvenile| adult; heart| ovary| prostate| spleen| testis| juvenile| adult	GO:0006915; GO:0043065; GO:0043620; GO:0045892; GO:2000144; GO:2001022; GO:2001244; GO:0000266; GO:0009060; GO:0007005	apoptotic process; positive regulation of apoptotic process; regulation of DNA-templated transcription in response to stress; negative regulation of transcription, DNA-templated; positive regulation of DNA-templated transcription, initiation; positive regulation of response to DNA damage stimulus; positive regulation of intrinsic apoptotic signaling pathway; mitochondrial fission; aerobic respira…	GO:0005634; GO:0005654; GO:0005730; GO:0016607; GO:0005739	nucleus; nucleoplasm; nucleolus; nuclear speck; mitochondrion	GO:0003677; GO:0044822; GO:0005515	DNA binding; poly(A) RNA binding; protein binding		chr1	17344331	17371115	RefSeq; GenBank; ENSEMBL; NONCODE	Rattus norvegicus BCL2-associated transcription factor 1 (Bclaf1), mRNA.; PREDICTED: Rattus norvegicus BCL2-associated transcription factor 1 (Bclaf1), transcript variant X2, mRNA.; PREDICTED: Rattus norvegicus BCL2-associated transcription factor 1 (Bclaf1), transcript variant X3, mRNA.; PREDICTED: Rattus norvegicus BCL2-associated transcription factor 1 (Bclaf1), transcript variant X4, mRNA.; P…	ENSRNOT00000078589; ENSRNOT00000088025; ENSRNOT00000089966	Pfam	1	main	o
63	17610790	mitochondrial fission regulator 2	Mtfr2	BC159435	Rn.202401; Rn.15652	-0.10751	down	0.434486	5.52893	5.63644	5.7323	5.48728	5.68973	5.33742	5.58721	5.66215	100911069	NM_001290110///XM_006227672	B0K035; B1WC16; A0A0G2K2F2; A0A0G2K1G0; A0A0G2K2S3	BC159435; ENSRNOT00000079069; ENSRNOT00000083012; ENSRNOT00000088025; ENSRNOT00000089966	heart| ovary| prostate| spleen| testis| juvenile| adult; adipose tissue| adrenal gland| brain| connective tissue| dorsal root ganglion| embryonic tissue| eye| heart| kidney| liver| lung| ovary| pancreas| pituitary gland| placenta| prostate| spleen| thymus|tailbud embryo| metamorphosing embryo| fetus| juvenile| adult	GO:0000266; GO:0006915; GO:0007005; GO:0009060; GO:0045892; GO:2001022; GO:0043065; GO:0043620; GO:2000144; GO:2001244	mitochondrial fission; apoptotic process; mitochondrion organization; aerobic respiration; negative regulation of transcription, DNA-templated; positive regulation of response to DNA damage stimulus; positive regulation of apoptotic process; regulation of DNA-templated transcription in response to stress; positive regulation of DNA-templated transcription, initiation; positive regulation of intri…	GO:0005634; GO:0005739; GO:0005654; GO:0005730; GO:0016607	nucleus; mitochondrion; nucleoplasm; nucleolus; nuclear speck	GO:0003677; GO:0044822; GO:0005515	DNA binding; poly(A) RNA binding; protein binding		chrUn	0	15675	RefSeq; GenBank; ENSEMBL; NONCODE	Rattus norvegicus mitochondrial fission regulator 2 (Mtfr2), mRNA.; PREDICTED: Rattus norvegicus protein FAM54A-like (LOC100911069), transcript variant X1, mRNA.; Rattus norvegicus BCL2-associated transcription factor 1, mRNA (cDNA clone IMAGE:9101044), complete cds.; Mitochondrial fission regulator 2 [gene_biotype:protein_coding transcript_biotype:protein_coding]; cdna:genscan chromosome:Rnor_6.…	ENSRNOT00000079069; ENSRNOT00000083012; ENSRNOT00000088025; ENSRNOT00000089966	Pfam	1	main	o
64	17610799					-0.00585643	down	0.968245	4.23642	4.24228	4.13148	4.17715	4.41819	4.05374	4.23506	4.42046													chr1	18873741	18873881	ENSEMBL	Small nucleolar RNA SNORA41 [gene_biotype:snoRNA transcript_biotype:snoRNA]			1	main
65	17610801	Abelson helper integration site 1; jouberin-like	Ahi1; LOC103690149	AY647140|FQ226565	Rn.155144	0.455264	up	0.30557	9.74564	9.29037	9.17719	9.27006	9.42387	10.1383	10.1151	8.98354	308923; 103690149	NM_001002277///XM_008758641///XM_008758642///XR_589864///XR_589865///XR_589866///XR_589867	Q6DTM3; F1M9F9; M0RE04	NM_001002277; ENSRNOT00000019076; AY647140; FQ226565	adipose tissue| brain| heart| ovary| pituitary gland| placenta| prostate| testis| thymus| juvenile| adult	GO:0001738; GO:0001947; GO:0002092; GO:0006903; GO:0007169; GO:0007417; GO:0010628; GO:0010842; GO:0010976; GO:0016192; GO:0030862; GO:0030902; GO:0033365; GO:0034613; GO:0035844; GO:0035845; GO:0039008; GO:0039023; GO:0042384; GO:0042462; GO:0043066; GO:0045927; GO:0045944; GO:0046548; GO:0046549; GO:0050708; GO:0050795; GO:0060041; GO:0060271; GO:0065001; GO:0070121; GO:0070986; GO:0071599; GO:…	morphogenesis of a polarized epithelium; heart looping; positive regulation of receptor internalization; vesicle targeting; transmembrane receptor protein tyrosine kinase signaling pathway; central nervous system development; positive regulation of gene expression; retina layer formation; positive regulation of neuron projection development; vesicle-mediated transport; positive regulation of pola…	GO:0001750; GO:0005813; GO:0005814; GO:0005911; GO:0005912; GO:0005929; GO:0031513; GO:0036038; GO:0036064; GO:0072372; GO:0005575; GO:0005737; GO:0005856; GO:0030054; GO:0042995	photoreceptor outer segment; centrosome; centriole; cell-cell junction; adherens junction; cilium; nonmotile primary cilium; TCTN-B9D complex; ciliary basal body; primary cilium; cellular_component; cytoplasm; cytoskeleton; cell junction; cell projection	GO:0042802; GO:0003674; GO:0005515	identical protein binding; molecular_function; protein binding		chrUn	0	121256	RefSeq; ENSEMBL; GenBank; NONCODE	Rattus norvegicus Abelson helper integration site 1 (Ahi1), mRNA.; PREDICTED: Rattus norvegicus jouberin-like (LOC103690149), transcript variant X1, mRNA.; PREDICTED: Rattus norvegicus jouberin-like (LOC103690149), transcript variant X2, mRNA.; PREDICTED: Rattus norvegicus jouberin-like (LOC103690149), transcript variant X3, misc_RNA.; PREDICTED: Rattus norvegicus jouberin-like (LOC103690149), tr…	ENSRNOT00000019076; ENSRNOT00000075461	Pfam	1	main						o	o
66	17610827	HBS1-like translational GTPase	Hbs1l	BC079463	Rn.98198	-0.021879	down	0.804153	8.99174	9.01362	9.08279	8.96174	8.99633	8.87218	8.97502	9.12802	293408	NM_001011934	Q6AXM7; F1M8E8; A0A0G2K2P6	NM_001011934; ENSRNOT00000019734; ENSRNOT00000086756; BC079463	adipose tissue| adrenal gland| brain| connective tissue| dorsal root ganglion| embryonic tissue| eye| heart| kidney| liver| lung| muscle| ovary| pancreas| pituitary gland| placenta| prostate| small intestine| spleen| thymus|tailbud embryo| metamorphosing embryo| fetus| juvenile| adult	GO:0006412; GO:0006414; GO:0032790; GO:0008152	translation; translational elongation; ribosome disassembly; metabolic process	GO:0005622; GO:0016020; GO:0070062	intracellular; membrane; extracellular exosome	GO:0003746; GO:0003924; GO:0005525; GO:0000166	translation elongation factor activity; GTPase activity; GTP binding; nucleotide binding		chr1	17983700	18051510	RefSeq; ENSEMBL; GenBank; NONCODE	Rattus norvegicus HBS1-like translational GTPase (Hbs1l), mRNA.; HBS1-like translational GTPase [gene_biotype:protein_coding transcript_biotype:protein_coding]; Rattus norvegicus Hbs1-like (S. cerevisiae), mRNA (cDNA clone MGC:95018 IMAGE:7122195), complete cds.; cdna:genscan chromosome:Rnor_6.0:1:16859109:16895742:1 transcript_biotype:protein_coding; cdna:genscan chromosome:Rnor_6.0:1:16819100:1…	ENSRNOT00000019734; ENSRNOT00000086756	Pfam	1	main
67	17610845	aldehyde dehydrogenase 8 family, member A1	Aldh8a1		Rn.44523	-0.209869	down	0.0711778	5.21977	5.42964	5.34956	5.34789	5.59147	5.27365	5.17368	5.21199	685750	NM_001191088///XM_006227674	D3ZXY4	NM_001191088; XM_006227674; ENSRNOT00000020015	kidney| liver| juvenile| adult	GO:0042573; GO:0042574; GO:0042904; GO:0055114; GO:0008152	retinoic acid metabolic process; retinal metabolic process; 9-cis-retinoic acid biosynthetic process; oxidation-reduction process; metabolic process	GO:0005622; GO:0070062	intracellular; extracellular exosome	GO:0001758; GO:0004029; GO:0016491; GO:0016620	retinal dehydrogenase activity; aldehyde dehydrogenase (NAD) activity; oxidoreductase activity; oxidoreductase activity, acting on the aldehyde or oxo group of donors, NAD or NADP as acceptor		chr1	18065379	18084495	RefSeq; ENSEMBL; NONCODE	Rattus norvegicus aldehyde dehydrogenase 8 family, member A1 (Aldh8a1), mRNA.; PREDICTED: Rattus norvegicus aldehyde dehydrogenase 8 family, member A1 (Aldh8a1), transcript variant X1, mRNA.; aldehyde dehydrogenase 8 family, member A1 [gene_biotype:protein_coding transcript_biotype:protein_coding]; cdna:genscan chromosome:Rnor_6.0:1:16904711:16929304:1 transcript_biotype:protein_coding; Non-codin…	ENSRNOT00000020015	Pfam	1	main
68	17610855					-0.0952367	down	0.70752	3.49734	3.59258	3.22058	4.00139	3.55577	3.46335	3.62921	3.39947													chr1	18124261	18124364	ENSEMBL	U6 spliceosomal RNA [gene_biotype:snRNA transcript_biotype:snRNA]			3	main
69	17610857					-0.246799	down	0.221532	4.28851	4.53531	4.45607	4.41337	4.7365	4.39928	4.01566	4.45061													chr1	18149651	18149894	ENSEMBL	Nuclear RNase P [gene_biotype:ribozyme transcript_biotype:ribozyme]			1	main
70	17610859					0.103736	up	0.261762	3.64925	3.54551	3.58544	3.54133	3.50977	3.52491	3.78826	3.63458													chr1	19850089	19854004	ENSEMBL	cdna:genscan chromosome:Rnor_6.0:1:18331793:18340086:1 transcript_biotype:protein_coding			1	main
71	17610865	similar to hypothetical protein 4930474N05 [Source:RGD Symbol;Acc:1560695]	RGD1560695			-0.0916681	down	0.182706	4.22459	4.31625	4.41724	4.2397	4.29182	4.24094	4.25102	4.18179			D3ZYU2			GO:0043547	positive regulation of GTPase activity	GO:0005622	intracellular	GO:0005085	guanyl-nucleotide exchange factor activity		chr1	19866199	19866921	ENSEMBL	similar to hypothetical protein 4930474N05 [gene_biotype:protein_coding transcript_biotype:protein_coding]; cdna:genscan chromosome:Rnor_6.0:1:18353812:18354851:1 transcript_biotype:protein_coding	ENSRNOT00000029394	Pfam	3	main
72	17610868	laminin, alpha 2	Lama2			-0.0615625	down	0.633195	7.30644	7.36801	7.38153	7.39268	7.32981	7.13954	7.24596	7.53383	309368	XM_008758643///XM_008774283	F1M614			GO:0007155; GO:0007411; GO:0022011; GO:0030155; GO:0030198; GO:0030334; GO:0032224; GO:0045995	cell adhesion; axon guidance; myelination in peripheral nervous system; regulation of cell adhesion; extracellular matrix organization; regulation of cell migration; positive regulation of synaptic transmission, cholinergic; regulation of embryonic development	GO:0005604; GO:0005605; GO:0042383; GO:0043197; GO:0070062; GO:0005606	basement membrane; basal lamina; sarcolemma; dendritic spine; extracellular exosome; laminin-1 complex	GO:0005102; GO:0003674	receptor binding; molecular_function		chrUn	0	681997	RefSeq; ENSEMBL; NONCODE	PREDICTED: Rattus norvegicus laminin, alpha 2 (Lama2), transcript variant X2, mRNA.; PREDICTED: Rattus norvegicus laminin, alpha 2 (Lama2), transcript variant X1, mRNA.; laminin, alpha 2 [gene_biotype:protein_coding transcript_biotype:protein_coding]; cdna:genscan chromosome:Rnor_6.0:1:18640557:18648538:1 transcript_biotype:protein_coding; cdna:genscan chromosome:Rnor_6.0:1:18683793:18694289:1 tr…	ENSRNOT00000014917; ENSRNOT00000079138	Pfam	1	main						o	o
73	17610933					0.126464	up	0.784052	3.81933	3.69287	3.64235	3.72544	3.71081	3.13123	4.61236	3.7144													chr1	20089514	20089620	ENSEMBL	U6 spliceosomal RNA [gene_biotype:snRNA transcript_biotype:snRNA]			3	main
74	17610935	l(3)mbt-like 3 (Drosophila)	L3mbtl3			0.240292	up	0.0542104	6.90985	6.66956	6.66001	6.5225	6.82617	6.93407	6.88241	6.91307	309550	XM_003748666///XM_003753137///XM_006227693///XM_006227695///XM_006227696///XM_006227697///XM_006227698///XM_006227699///XM_008758644	D3ZJT9			GO:0006355; GO:0030099; GO:0030225; GO:0030851; GO:0043249	regulation of transcription, DNA-templated; myeloid cell differentiation; macrophage differentiation; granulocyte differentiation; erythrocyte maturation	GO:0005634	nucleus	GO:0005515	protein binding		chr1	21510156	21585932	RefSeq; ENSEMBL; NONCODE	PREDICTED: Rattus norvegicus l(3)mbt-like 3 (Drosophila) (L3mbtl3), transcript variant X2, mRNA.; PREDICTED: Rattus norvegicus l(3)mbt-like 3 (Drosophila) (L3mbtl3), transcript variant X1, mRNA.; PREDICTED: Rattus norvegicus l(3)mbt-like 3 (Drosophila) (L3mbtl3), transcript variant X3, mRNA.; PREDICTED: Rattus norvegicus l(3)mbt-like 3 (Drosophila) (L3mbtl3), transcript variant X6, mRNA.; PREDICT…	ENSRNOT00000061404	Pfam	1	main						o	o					o
75	17610961	transmembrane protein 200A	Tmem200a		Rn.162404	-0.0035495	down	0.983375	6.30457	6.30812	6.18666	6.28036	6.45732	6.57054	6.24202	6.10114	498987	NM_001109135///XM_006227690///XM_008758623///XM_008758624///XM_008758625	D3Z9K1; F1LZY8	NM_001109135; XM_006227690; XM_008758623; XM_008758624; XM_008758625; ENSRNOT00000070858	kidney| ovary| juvenile			GO:0016021; GO:0016020	integral component of membrane; membrane				chrUn	0	85196	RefSeq; ENSEMBL; NONCODE	Rattus norvegicus transmembrane protein 200A (Tmem200a), mRNA.; PREDICTED: Rattus norvegicus transmembrane protein 200A (Tmem200a), transcript variant X3, mRNA.; PREDICTED: Rattus norvegicus transmembrane protein 200A (Tmem200a), transcript variant X1, mRNA.; PREDICTED: Rattus norvegicus transmembrane protein 200A (Tmem200a), transcript variant X2, mRNA.; PREDICTED: Rattus norvegicus transmembran…	ENSRNOT00000070858	Pfam	1	main
76	17610966					0.00957917	up	0.950025	8.11848	8.1089	7.93912	8.31814	8.06944	8.01433	8.04145	8.29966													chr1	21875264	21875397	ENSEMBL; NONCODE	U11 spliceosomal RNA [gene_biotype:snRNA transcript_biotype:snRNA]; Non-coding transcript identified by NONCODE			3	main
77	17610968					0.218506	up	0.222149	8.43793	8.21943	8.0325	8.34459	8.28119	8.52112	8.20592	8.58676													chr1	22211304	22211788	ENSEMBL	cdna:genscan chromosome:Rnor_6.0:1:20729643:20730005:1 transcript_biotype:protein_coding			1	main
78	17610971	small leucine-rich protein 1	Smlr1	FQ211051	Rn.12393	0.129433	up	0.179972	3.96844	3.83901	3.9284	3.73939	3.84923	3.95051	3.87823	4.07658	686032	NM_001195606	M0R807	NM_001195606; ENSRNOT00000071726; FQ211051; OTTRNOT00000000177				GO:0016021; GO:0016020	integral component of membrane; membrane	GO:0005515	protein binding		chrUn	0	36729	RefSeq; ENSEMBL; GenBank; Havana transcript; NONCODE	Rattus norvegicus small leucine-rich protein 1 (Smlr1), mRNA.; small leucine-rich protein 1 [gene_biotype:protein_coding transcript_biotype:protein_coding]; Rattus norvegicus TL0ABA18YE15 mRNA sequence.; small leucine-rich protein 1[gene_biotype:protein_coding transcript_biotype:protein_coding]; cdna:genscan chromosome:Rnor_6.0:1:20852761:20893875:1 transcript_biotype:protein_coding; Non-coding t…			1	main
79	17610974	A kinase (PRKA) anchor protein 7	Akap7	AY350741|BC098632	Rn.204773	0.236663	up	0.192555	7.65601	7.41934	7.29947	7.54681	7.41174	7.62227	7.90174	7.444	361458	NM_001001801	Q6JP77; A0A0A0MXX1	NM_001001801; ENSRNOT00000017617; AY350741; BC098632	brain| colon| connective tissue| eye| small intestine| fetus| juvenile| adult	GO:0008104; GO:0010738; GO:0060306; GO:0071320; GO:1901381; GO:1902261	protein localization; regulation of protein kinase A signaling; regulation of membrane repolarization; cellular response to cAMP; positive regulation of potassium ion transmembrane transport; positive regulation of delayed rectifier potassium channel activity	GO:0005634; GO:0005737; GO:0005829; GO:0016020; GO:0016324; GO:0016328; GO:0016529; GO:0030315; GO:0043234; GO:0070382; GO:0005886	nucleus; cytoplasm; cytosol; membrane; apical plasma membrane; lateral plasma membrane; sarcoplasmic reticulum; T-tubule; protein complex; exocytic vesicle; plasma membrane	GO:0005515; GO:0008022; GO:0016208; GO:0019901; GO:0019904; GO:0032947; GO:0034237; GO:0051018	protein binding; protein C-terminus binding; AMP binding; protein kinase binding; protein domain specific binding; protein complex scaffold; protein kinase A regulatory subunit binding; protein kinase A binding		chr1	22609540	22744656	RefSeq; ENSEMBL; GenBank; NONCODE	Rattus norvegicus A kinase (PRKA) anchor protein 7 (Akap7), mRNA.; A kinase (PRKA) anchor protein 7 [gene_biotype:protein_coding transcript_biotype:protein_coding]; Rattus norvegicus AKAP18 delta isoform mRNA, complete cds.; Rattus norvegicus A kinase (PRKA) anchor protein 7, mRNA (cDNA clone MGC:112559 IMAGE:7315112), complete cds.; cdna:genscan chromosome:Rnor_6.0:1:21235685:21263850:1 transcri…	ENSRNOT00000017617	Pfam	1	main
80	17610983					-0.270721	down	0.341799	5.70792	5.97864	6.09212	5.59993	6.24388	5.52101	6.02445	5.5783													chr1	22645437	22645560	ENSEMBL; NONCODE	Small nucleolar RNA SNORA17 [gene_biotype:snoRNA transcript_biotype:snoRNA]; Non-coding transcript identified by NONCODE			3	main
81	17610985	arginase 1	Arg1	BC091158|J02720	Rn.9857	0.120297	up	0.396094	6.62469	6.50439	6.43121	6.41491	6.66706	6.61243	6.46312	6.79851	29221	NM_017134	P07824	NM_017134; ENSRNOT00000017911; BC091158; J02720	brain| colon| connective tissue| eye| liver| lung| pancreas| small intestine| spleen| juvenile| adult	GO:0000050; GO:0001889; GO:0001938; GO:0006525; GO:0007565; GO:0007568; GO:0009611; GO:0009635; GO:0010042; GO:0010043; GO:0010269; GO:0010963; GO:0014075; GO:0019547; GO:0030324; GO:0032496; GO:0032964; GO:0033189; GO:0033197; GO:0042493; GO:0043200; GO:0043434; GO:0046686; GO:0048545; GO:0048678; GO:0051597; GO:0060056; GO:0060135; GO:0070207; GO:0070301; GO:0071222; GO:0071353; GO:0071377; GO:…	urea cycle; liver development; positive regulation of endothelial cell proliferation; arginine metabolic process; female pregnancy; aging; response to wounding; response to herbicide; response to manganese ion; response to zinc ion; response to selenium ion; regulation of L-arginine import; response to amine; arginine catabolic process to ornithine; lung development; response to lipopolysaccharid…	GO:0005615; GO:0005634; GO:0005737; GO:0005741; GO:0043005; GO:0043025; GO:0070062	extracellular space; nucleus; cytoplasm; mitochondrial outer membrane; neuron projection; neuronal cell body; extracellular exosome	GO:0004053; GO:0030145; GO:0016787; GO:0016813; GO:0046872	arginase activity; manganese ion binding; hydrolase activity; hydrolase activity, acting on carbon-nitrogen (but not peptide) bonds, in linear amidines; metal ion binding		chr1	23005330	23017714	RefSeq; ENSEMBL; GenBank; NONCODE	Rattus norvegicus arginase 1 (Arg1), mRNA.; arginase 1 [gene_biotype:protein_coding transcript_biotype:protein_coding]; Rattus norvegicus arginase, liver, mRNA (cDNA clone MGC:108729 IMAGE:7368991), complete cds.; Rat liver arginase mRNA, complete cds.; cdna:genscan chromosome:Rnor_6.0:1:21520494:21525615:1 transcript_biotype:protein_coding; cdna:genscan chromosome:Rnor_6.0:1:21530374:21537482:1 …	ENSRNOT00000017911	Pfam	1	main
82	17610996	ectonucleotide pyrophosphatase/phosphodiesterase 3	Enpp3	BC097326|D30649|U78787|U78788	Rn.44	-0.31689	down	0.0927929	5.45593	5.77282	6.0312	5.71414	5.57312	5.40318	5.41026	5.55435	54410	NM_019370///XM_008758654	P97675; Q9QYV2	NM_019370; ENSRNOT00000018695; BC097326; D30649; U78787; U78788	adipose tissue| colon| connective tissue| eye| liver| lung| muscle| placenta| prostate| small intestine| testis| fetus| juvenile| adult	GO:0006796; GO:0006898; GO:0006955; GO:0009143; GO:0030505; GO:0051150; GO:0090305; GO:0008152	phosphate-containing compound metabolic process; receptor-mediated endocytosis; immune response; nucleoside triphosphate catabolic process; inorganic diphosphate transport; regulation of smooth muscle cell differentiation; nucleic acid phosphodiester bond hydrolysis; metabolic process	GO:0005886; GO:0009986; GO:0016021; GO:0048471; GO:0070062; GO:0005576; GO:0016020	plasma membrane; cell surface; integral component of membrane; perinuclear region of cytoplasm; extracellular exosome; extracellular region; membrane	GO:0003676; GO:0004528; GO:0004551; GO:0005044; GO:0030247; GO:0035529; GO:0046872; GO:0047429; GO:0003824; GO:0016787	nucleic acid binding; phosphodiesterase I activity; nucleotide diphosphatase activity; scavenger receptor activity; polysaccharide binding; NADH pyrophosphatase activity; metal ion binding; nucleoside-triphosphate diphosphatase activity; catalytic activity; hydrolase activity		chr1	23093113	23164282	RefSeq; ENSEMBL; GenBank; NONCODE	Rattus norvegicus ectonucleotide pyrophosphatase/phosphodiesterase 3 (Enpp3), mRNA.; ectonucleotide pyrophosphatase/phosphodiesterase 3 [gene_biotype:protein_coding transcript_biotype:protein_coding]; Rattus norvegicus ectonucleotide pyrophosphatase/phosphodiesterase 3, mRNA (cDNA clone MGC:114330 IMAGE:7458431), complete cds.; Rattus norvegicus mRNA for phosphodiesterase I, complete cds.; Rattus…	ENSRNOT00000018695	Pfam	1	main
83	17611024	ectonucleotide pyrophosphatase/phosphodiesterase 1	Enpp1	AF320054|AF340185|AF340186	Rn.1199	-0.0695047	down	0.626674	7.576	7.64551	7.70485	7.40887	7.82281	7.64653	7.48447	7.59701	85496	NM_053535///XM_006227692	Q924C3; O88827; G3V7V4	NM_053535; XM_006227692; ENSRNOT00000019519; AF320054; AF340185; AF340186	brain| colon| connective tissue| muscle| ovary| pancreas| pineal gland| placenta| prostate| fetus| juvenile| adult	GO:0006091; GO:0006796; GO:0006898; GO:0006955; GO:0009143; GO:0030279; GO:0030308; GO:0030505; GO:0030643; GO:0030730; GO:0031214; GO:0031953; GO:0032869; GO:0045599; GO:0045719; GO:0046325; GO:0046627; GO:0046849; GO:0050427; GO:0090305; GO:0008150; GO:0008152	generation of precursor metabolites and energy; phosphate-containing compound metabolic process; receptor-mediated endocytosis; immune response; nucleoside triphosphate catabolic process; negative regulation of ossification; negative regulation of cell growth; inorganic diphosphate transport; cellular phosphate ion homeostasis; sequestering of triglyceride; biomineral tissue development; negative…	GO:0005576; GO:0005615; GO:0005765; GO:0005886; GO:0005887; GO:0009986; GO:0016021; GO:0016323; GO:0005575; GO:0016020	extracellular region; extracellular space; lysosomal membrane; plasma membrane; integral component of plasma membrane; cell surface; integral component of membrane; basolateral plasma membrane; cellular_component; membrane	GO:0003676; GO:0004528; GO:0004551; GO:0005044; GO:0005158; GO:0005509; GO:0005524; GO:0008270; GO:0030247; GO:0035529; GO:0042803; GO:0046872; GO:0047429; GO:0003674; GO:0003824; GO:0016787; GO:0005515	nucleic acid binding; phosphodiesterase I activity; nucleotide diphosphatase activity; scavenger receptor activity; insulin receptor binding; calcium ion binding; ATP binding; zinc ion binding; polysaccharide binding; NADH pyrophosphatase activity; protein homodimerization activity; metal ion binding; nucleoside-triphosphate diphosphatase activity; molecular_function; catalytic activity; hydrolas…		chr1	23228281	23291660	RefSeq; ENSEMBL; GenBank; NONCODE	Rattus norvegicus ectonucleotide pyrophosphatase/phosphodiesterase 1 (Enpp1), mRNA.; PREDICTED: Rattus norvegicus ectonucleotide pyrophosphatase/phosphodiesterase 1 (Enpp1), transcript variant X1, mRNA.; ectonucleotide pyrophosphatase/phosphodiesterase 1 [gene_biotype:protein_coding transcript_biotype:protein_coding]; Rattus norvegicus ecto-nucleotide pyrophosphatase mRNA, complete cds.; Rattus n…	ENSRNOT00000019519	Pfam	1	main												o
84	17611050	trace amine-associated receptor 9	Taar9		Rn.138162	0.151094	up	0.302869	5.24385	5.09276	4.96788	5.34025	4.97015	5.26994	5.28198	5.17965	319107	NM_175602	Q923Y6	NM_175602; ENSRNOT00000038523		GO:0007606; GO:0010579; GO:0007165; GO:0007186	sensory perception of chemical stimulus; positive regulation of adenylate cyclase activity involved in G-protein coupled receptor signaling pathway; signal transduction; G-protein coupled receptor signaling pathway	GO:0005887; GO:0005886; GO:0016020; GO:0016021	integral component of plasma membrane; plasma membrane; membrane; integral component of membrane	GO:0001594; GO:0004871; GO:0004930	trace-amine receptor activity; signal transducer activity; G-protein coupled receptor activity		chr1	23799480	23800526	RefSeq; ENSEMBL; NONCODE	Rattus norvegicus trace amine-associated receptor 9 (Taar9), mRNA.; trace amine-associated receptor 9 [gene_biotype:protein_coding transcript_biotype:protein_coding]; cdna:genscan chromosome:Rnor_6.0:1:22319353:22365675:1 transcript_biotype:protein_coding; Non-coding transcript identified by NONCODE	ENSRNOT00000038523	Pfam	1	main
85	17611052	trace amine-associated receptor 8c	Taar8c		Rn.138161	-0.0756823	down	0.713063	4.96071	5.03639	5.07538	5.14361	4.89019	5.29321	4.69411	4.89481	319105	NM_175600	Q923Y0; A0A0G2KAF7	NM_175600; ENSRNOT00000091252		GO:0007606; GO:0010579; GO:0007165; GO:0007186	sensory perception of chemical stimulus; positive regulation of adenylate cyclase activity involved in G-protein coupled receptor signaling pathway; signal transduction; G-protein coupled receptor signaling pathway	GO:0005887; GO:0005886; GO:0016020; GO:0016021	integral component of plasma membrane; plasma membrane; membrane; integral component of membrane	GO:0001594; GO:0004871; GO:0004930	trace-amine receptor activity; signal transducer activity; G-protein coupled receptor activity		chrUn	0	1035	RefSeq; ENSEMBL	Rattus norvegicus trace amine-associated receptor 8c (Taar8c), mRNA.; trace amine-associated receptor 8c (Taar8c), mRNA [gene_biotype:protein_coding transcript_biotype:protein_coding]	ENSRNOT00000091252	Pfam	3	main
86	17611054	trace amine-associated receptor 8b	Taar8b		Rn.162405	0.0999766	up	0.475248	4.68633	4.58635	4.72983	4.36101	4.66821	4.5746	4.73944	4.74495	319106	NM_175601///XM_006227718///XM_006227719///XM_008758615	Q923Y3	NM_175601; XM_006227718; XM_006227719; XM_008758615		GO:0007606; GO:0010579; GO:0007165; GO:0007186	sensory perception of chemical stimulus; positive regulation of adenylate cyclase activity involved in G-protein coupled receptor signaling pathway; signal transduction; G-protein coupled receptor signaling pathway	GO:0005887; GO:0005886; GO:0016020; GO:0016021	integral component of plasma membrane; plasma membrane; membrane; integral component of membrane	GO:0001594; GO:0004871; GO:0004930	trace-amine receptor activity; signal transducer activity; G-protein coupled receptor activity		chr1	25037235	25038269	RefSeq; ENSEMBL; NONCODE	Rattus norvegicus trace amine-associated receptor 8b (Taar8b), mRNA.; PREDICTED: Rattus norvegicus trace amine-associated receptor 8b (Taar8b), transcript variant X3, mRNA.; PREDICTED: Rattus norvegicus trace amine-associated receptor 8b (Taar8b), transcript variant X1, mRNA.; PREDICTED: Rattus norvegicus trace amine-associated receptor 8b (Taar8b), transcript variant X2, mRNA.; cdna:genscan chro…			1	main
87	17611056	trace amine-associated receptor 7a	Taar7a		Rn.138140	0.0462833	up	0.849918	2.71002	2.66373	2.54058	2.70246	2.74817	2.79348	3.04336	2.29322	294125	NM_175585	Q923Y2	NM_175585		GO:0007606; GO:0010579; GO:0007165; GO:0007186	sensory perception of chemical stimulus; positive regulation of adenylate cyclase activity involved in G-protein coupled receptor signaling pathway; signal transduction; G-protein coupled receptor signaling pathway	GO:0005887; GO:0005886; GO:0016020; GO:0016021	integral component of plasma membrane; plasma membrane; membrane; integral component of membrane	GO:0001594; GO:0004871; GO:0004930	trace-amine receptor activity; signal transducer activity; G-protein coupled receptor activity		chr1	24003601	24005748	RefSeq; ENSEMBL; NONCODE	Rattus norvegicus trace amine-associated receptor 7a (Taar7a), mRNA.; cdna:genscan chromosome:Rnor_6.0:1:22528704:22529735:1 transcript_biotype:protein_coding; Non-coding transcript identified by NONCODE			1	main
88	17611060	trace amine-associated receptor 6	Taar6		Rn.138139	-0.0260695	down	0.831128	4.23443	4.2605	4.1017	4.41806	4.26172	4.09921	4.32713	4.27695	294124	NM_175584	Q923Y5	NM_175584; ENSRNOT00000021529		GO:0007606; GO:0010579; GO:0007165; GO:0007186	sensory perception of chemical stimulus; positive regulation of adenylate cyclase activity involved in G-protein coupled receptor signaling pathway; signal transduction; G-protein coupled receptor signaling pathway	GO:0005887; GO:0005886; GO:0016020; GO:0016021	integral component of plasma membrane; plasma membrane; membrane; integral component of membrane	GO:0001594; GO:0004871; GO:0004930	trace-amine receptor activity; signal transducer activity; G-protein coupled receptor activity		chr1	24011141	24012178	RefSeq; ENSEMBL; NONCODE	Rattus norvegicus trace amine-associated receptor 6 (Taar6), mRNA.; trace amine-associated receptor 6 [gene_biotype:protein_coding transcript_biotype:protein_coding]; cdna:genscan chromosome:Rnor_6.0:1:22536199:22537236:1 transcript_biotype:protein_coding; Non-coding transcript identified by NONCODE	ENSRNOT00000021529	Pfam	1	main
89	17611062	ribosomal protein S12	Rps12	BC058460	Rn.8400; Rn.115713	-0.0883871	down	0.426428	5.77052	5.85891	5.6818	5.9863	5.90864	5.85034	5.71836	5.74287	65139	NM_031709	P63324; Q6PDW1	NM_031709; ENSRNOT00000022184	brain| connective tissue| dorsal root ganglion| eye| kidney| liver| lung| ovary| pancreas| pituitary gland| juvenile| adult; adrenal gland| brain| connective tissue| dorsal root ganglion| embryonic tissue| eye| heart| kidney| liver| lung| muscle| ovary| pancreas| pituitary gland| prostate| vibrissa| metamorphosing embryo| fetus| juvenile| adult	GO:0006412; GO:0008150	translation; biological_process	GO:0016020; GO:0022627; GO:0005622; GO:0005737; GO:0005840; GO:0030529	membrane; cytosolic small ribosomal subunit; intracellular; cytoplasm; ribosome; ribonucleoprotein complex	GO:0003735; GO:0044822; GO:0003674	structural constituent of ribosome; poly(A) RNA binding; molecular_function		chr1	24229986	24232144	RefSeq; ENSEMBL; GenBank; NONCODE	Rattus norvegicus ribosomal protein S12 (Rps12), mRNA.; ribosomal protein S12-like [gene_biotype:protein_coding transcript_biotype:protein_coding]; cdna:genscan chromosome:Rnor_6.0:1:22758082:22785100:1 transcript_biotype:protein_coding; Rattus norvegicus ribosomal protein S12, mRNA (cDNA clone MGC:72763 IMAGE:6919500), complete cds.; Non-coding transcript identified by NONCODE	ENSRNOT00000022184	Pfam	1	main
90	17611069					-0.187667	down	0.531845	3.69124	3.8789	4.02525	4.06677	3.54469	3.37727	4.10907	3.58737													chr1	24230691	24230764	ENSEMBL; NONCODE	Small nucleolar RNA SNORD101 [gene_biotype:snoRNA transcript_biotype:snoRNA]; Non-coding transcript identified by NONCODE			1	main
91	17611071					0.139848	up	0.689564	8.98968	8.84983	8.42129	9.38133	8.74687	8.77256	9.30817	8.88829													chr1	24231403	24231477	ENSEMBL; NONCODE	Small nucleolar RNA SNORD100 [gene_biotype:snoRNA transcript_biotype:snoRNA]; Non-coding transcript identified by NONCODE			1	main
92	17611073					0.649801	up	0.0982065	6.94728	6.29748	6.47357	6.4016	6.01727	6.62033	7.47709	6.74442													chr1	24231737	24231863	ENSEMBL; NONCODE	Small nucleolar RNA SNORA33 [gene_biotype:snoRNA transcript_biotype:snoRNA]; Non-coding transcript identified by NONCODE			3	main
93	17611075					-0.157196	down	0.254965	3.62444	3.78164	3.60055	3.9889	3.75546	3.55654	3.63905	3.67774													chrUn	0	2801					1	main
94	17611079	EYA transcriptional coactivator and phosphatase 4	Eya4		Rn.130635	0.367023	up	0.592335	5.43068	5.06365	5.33281	5.29326	4.56488	4.27138	5.96825	6.0524	292172	NM_001271317///XM_008758600	F1LX86	NM_001271317; XM_008758600; ENSRNOT00000022362	prostate| adult	GO:0006355; GO:0007605; GO:0035335; GO:0042474; GO:0048839; GO:0006470; GO:0007275; GO:0008152	regulation of transcription, DNA-templated; sensory perception of sound; peptidyl-tyrosine dephosphorylation; middle ear morphogenesis; inner ear development; protein dephosphorylation; multicellular organismal development; metabolic process	GO:0005575	cellular_component	GO:0004725; GO:0046872; GO:0003674; GO:0004721; GO:0016787	protein tyrosine phosphatase activity; metal ion binding; molecular_function; phosphoprotein phosphatase activity; hydrolase activity		chr1	24847610	25079458	RefSeq; ENSEMBL	Rattus norvegicus EYA transcriptional coactivator and phosphatase 4 (Eya4), mRNA.; PREDICTED: Rattus norvegicus EYA transcriptional coactivator and phosphatase 4 (Eya4), transcript variant X1, mRNA.; EYA transcriptional coactivator and phosphatase 4 [gene_biotype:protein_coding transcript_biotype:protein_coding]; cdna:genscan chromosome:Rnor_6.0:1:23378050:23494150:1 transcript_biotype:protein_co…			1	main
95	17611107	transcription factor 21	Tcf21	BC100106	Rn.1671	0.147078	up	0.102893	5.23767	5.0906	4.99654	5.16954	5.10571	5.3015	5.14319	5.26834	252856	NM_001032397	Q498R2; O70483	NM_001032397; ENSRNOT00000022798; BC100106	colon| kidney| liver| lung| ovary| placenta| small intestine| spleen| fetus| juvenile| adult	GO:0000122; GO:0001657; GO:0001658; GO:0001763; GO:0001822; GO:0001944; GO:0006366; GO:0007530; GO:0007548; GO:0009887; GO:0014707; GO:0030855; GO:0032835; GO:0045944; GO:0048286; GO:0048536; GO:0048557; GO:0048608; GO:0048732; GO:0060008; GO:0060021; GO:0060425; GO:0060426; GO:0060435; GO:0060539; GO:0060541; GO:0060766; GO:0072162; GO:0072277	negative regulation of transcription from RNA polymerase II promoter; ureteric bud development; branching involved in ureteric bud morphogenesis; morphogenesis of a branching structure; kidney development; vasculature development; transcription from RNA polymerase II promoter; sex determination; sex differentiation; organ morphogenesis; branchiomeric skeletal muscle development; epithelial cell d…	GO:0005634	nucleus	GO:0001077; GO:0001078; GO:0042826; GO:0043425; GO:0046983; GO:0050681; GO:0070888; GO:0005515	transcriptional activator activity, RNA polymerase II core promoter proximal region sequence-specific binding; transcriptional repressor activity, RNA polymerase II core promoter proximal region sequence-specific binding; histone deacetylase binding; bHLH transcription factor binding; protein dimerization activity; androgen receptor binding; E-box binding; protein binding		chr1	25370183	25373042	RefSeq; ENSEMBL; GenBank; NONCODE	Rattus norvegicus transcription factor 21 (Tcf21), mRNA.; transcription factor 21 [gene_biotype:protein_coding transcript_biotype:protein_coding]; Rattus norvegicus transcription factor 21, mRNA (cDNA clone MGC:112908 IMAGE:7379660), complete cds.; cdna:genscan chromosome:Rnor_6.0:1:23906942:23910381:1 transcript_biotype:protein_coding; Non-coding transcript identified by NONCODE	ENSRNOT00000022798	Pfam	1	main							o
96	17611112	TBP-like 1	Tbpl1	FQ234587|FQ213420	Rn.25148	0.0436439	up	0.708614	7.83549	7.79184	7.85058	7.62864	7.89631	7.71172	7.83847	7.95627	689030	NM_001127201///XM_006227721///XM_006227722///XM_008758627	D4A898	NM_001127201; XM_006227721; XM_006227722; XM_008758627; ENSRNOT00000014805; FQ234587; FQ213420	adipose tissue| brain| connective tissue| dorsal root ganglion| embryonic tissue| eye| heart| kidney| lung| pancreas| prostate| testis| thymus| metamorphosing embryo| fetus| juvenile| adult	GO:0001675; GO:0006235; GO:0006352; GO:0007283; GO:0007289	acrosome assembly; dTTP biosynthetic process; DNA-templated transcription, initiation; spermatogenesis; spermatid nucleus differentiation	GO:0005634; GO:0005672; GO:0005737	nucleus; transcription factor TFIIA complex; cytoplasm	GO:0003677; GO:0005515	DNA binding; protein binding		chr1	25441918	25466742	RefSeq; ENSEMBL; GenBank; NONCODE	Rattus norvegicus TBP-like 1 (Tbpl1), mRNA.; PREDICTED: Rattus norvegicus TBP-like 1 (Tbpl1), transcript variant X1, mRNA.; PREDICTED: Rattus norvegicus TBP-like 1 (Tbpl1), transcript variant X2, mRNA.; PREDICTED: Rattus norvegicus TBP-like 1 (Tbpl1), transcript variant X3, mRNA.; TBP-like 1 [gene_biotype:protein_coding transcript_biotype:protein_coding]; Rattus norvegicus TL0AEA58YG07 mRNA seque…	ENSRNOT00000014805	Pfam	1	main						o	o
97	17611123					0.16134	up	0.342344	5.27951	5.11817	5.15058	5.10088	5.10306	5.45681	5.39832	4.98341													chr1	25628504	25628989					1	main
98	17611126					0.0310227	up	0.773859	5.0072	4.97618	5.00646	5.12351	4.79856	5.05336	4.94094	5.0273													chr1	25773189	25773295	ENSEMBL	Small nucleolar RNA SNORD23 [gene_biotype:snoRNA transcript_biotype:snoRNA]			1	main
99	17611128	clavesin 2	Clvs2		Rn.230112	0.154553	up	0.369664	7.59308	7.43852	7.42394	7.24322	7.64842	7.5994	7.76028	7.41955	361459	NM_001108459	A6JUQ6	NM_001108459	brain| connective tissue| dorsal root ganglion| adult	GO:0006810; GO:0007040	transport; lysosome organization	GO:0005768; GO:0005802; GO:0030136; GO:0031901; GO:0005622; GO:0005794; GO:0016020; GO:0031410	endosome; trans-Golgi network; clathrin-coated vesicle; early endosome membrane; intracellular; Golgi apparatus; membrane; cytoplasmic vesicle	GO:0005215; GO:0080025; GO:0008289	transporter activity; phosphatidylinositol-3,5-bisphosphate binding; lipid binding		chrUn	0	109319	RefSeq; ENSEMBL; NONCODE	Rattus norvegicus clavesin 2 (Clvs2), mRNA.; clavesin 2 [gene_biotype:protein_coding transcript_biotype:protein_coding]; cdna:genscan chromosome:Rnor_6.0:1:25265574:25295939:1 transcript_biotype:protein_coding; cdna:genscan chromosome:Rnor_6.0:1:25174577:25217722:1 transcript_biotype:protein_coding; Non-coding transcript identified by NONCODE	ENSRNOT00000016518	Pfam	1	main
100	17611137					0.08916	up	0.629438	5.53852	5.44936	5.33522	5.4209	5.59195	5.83681	5.45105	5.32769													chr1	26816353	26817613	ENSEMBL	cdna:genscan chromosome:Rnor_6.0:1:25355044:25356816:1 transcript_biotype:protein_coding			1	main
101	17611142	Na+/K+ transporting ATPase interacting 2	Nkain2			-0.141061	down	0.417734	10.6594	10.8004	10.7878	10.7522	10.8612	10.3594	10.8612	10.7575	100362992	XM_008758676///XM_008774321	F1M3X2; M0RCY3			GO:0002028	regulation of sodium ion transport	GO:0005886; GO:0016021; GO:0016020	plasma membrane; integral component of membrane; membrane				chrUn	0	1027621	Havana transcript; RefSeq; ENSEMBL	Na+/K+ transporting ATPase interacting 2[gene_biotype:protein_coding transcript_biotype:protein_coding]; PREDICTED: Rattus norvegicus Na+/K+ transporting ATPase interacting 2 (Nkain2), mRNA.; Na+/K+ transporting ATPase interacting 2 [gene_biotype:protein_coding transcript_biotype:protein_coding]; cdna:genscan chromosome:Rnor_6.0:1:27412541:27563220:1 transcript_biotype:protein_coding	OTTRNOT00000001951; ENSRNOT00000047224; ENSRNOT00000075427	Pfam	1	main
102	17611148					-0.374729	down	0.258451	4.01484	4.38957	4.84767	4.29948	4.02154	3.71725	4.16912	4.15814													chr1	29176547	29176663	ENSEMBL	U4 spliceosomal RNA [gene_biotype:snRNA transcript_biotype:snRNA]			1	main
103	17611150	ring finger protein 217	Rnf217		Rn.9080	0.175117	up	0.25042	7.2647	7.08958	7.01262	7.27309	6.98303	7.29441	7.40754	7.09214	292188	NM_001106204	D4ABK2	NM_001106204; OTTRNOT00000001952	adrenal gland| brain| colon| embryonic tissue| heart| lung| ovary| spleen| metamorphosing embryo| adult	GO:0000209; GO:0032436; GO:0042787; GO:0016567	protein polyubiquitination; positive regulation of proteasomal ubiquitin-dependent protein catabolic process; protein ubiquitination involved in ubiquitin-dependent protein catabolic process; protein ubiquitination	GO:0000151; GO:0005737; GO:0016021; GO:0016020	ubiquitin ligase complex; cytoplasm; integral component of membrane; membrane	GO:0031624; GO:0046872; GO:0061630; GO:0008270; GO:0004842	ubiquitin conjugating enzyme binding; metal ion binding; ubiquitin protein ligase activity; zinc ion binding; ubiquitin-protein transferase activity		chr1	29757234	29846858	RefSeq; Havana transcript; ENSEMBL; NONCODE	Rattus norvegicus ring finger protein 217 (Rnf217), mRNA.; ring finger protein 217[gene_biotype:protein_coding transcript_biotype:protein_coding]; ring finger protein 217 [gene_biotype:protein_coding transcript_biotype:protein_coding]; cdna:genscan chromosome:Rnor_6.0:1:28347417:28477575:1 transcript_biotype:protein_coding; Non-coding transcript identified by NONCODE; cdna:genscan chromosome:Rnor…	OTTRNOT00000001952; ENSRNOT00000017831	Pfam	1	main
104	17611159	tumor protein D52-like 1	Tpd52l1	BC099809	Rn.24825	0.134124	up	0.527082	7.31288	7.17875	7.05987	7.21891	7.25748	7.6339	7.30882	6.99591	689256	NM_001044295///XM_006227737///XM_006227739///XM_008758674	Q499Q2; A0A0G2K8M7	NM_001044295; XM_006227737; XM_006227739; XM_008758674; ENSRNOT00000030327; ENSRNOT00000078841; BC099809	brain| eye| heart| kidney| lung| prostate|tailbud embryo| juvenile| adult	GO:0000086; GO:0043406; GO:0046330; GO:2001235	G2/M transition of mitotic cell cycle; positive regulation of MAP kinase activity; positive regulation of JNK cascade; positive regulation of apoptotic signaling pathway	GO:0005737; GO:0048471	cytoplasm; perinuclear region of cytoplasm	GO:0042802; GO:0042803; GO:0046982; GO:0005515	identical protein binding; protein homodimerization activity; protein heterodimerization activity; protein binding		chrUn	0	162967	RefSeq; ENSEMBL; GenBank; NONCODE	Rattus norvegicus tumor protein D52-like 1 (Tpd52l1), mRNA.; PREDICTED: Rattus norvegicus tumor protein D52-like 1 (Tpd52l1), transcript variant X2, mRNA.; PREDICTED: Rattus norvegicus tumor protein D52-like 1 (Tpd52l1), transcript variant X1, mRNA.; PREDICTED: Rattus norvegicus tumor protein D52-like 1 (Tpd52l1), transcript variant X3, mRNA.; tumor protein D52-like 1 [gene_biotype:protein_coding…	ENSRNOT00000030327; ENSRNOT00000078841	Pfam	1	main					o
105	17611168					-0.0347143	down	0.747834	4.67797	4.71269	4.69054	4.73054	4.71698	4.55336	4.60461	4.87594													chr1	30050771	30050883	ENSEMBL	5S ribosomal RNA [gene_biotype:rRNA transcript_biotype:rRNA]			1	main
106	17611170	hes-related family bHLH transcription factor with YRPW motif 2	Hey2		Rn.58672	-0.0810642	down	0.607893	6.81131	6.89237	7.06921	6.74505	6.86286	6.99639	6.61306	6.82448	155430	NM_130417	Q8VIH5; G3V7S6	NM_130417; ENSRNOT00000018718	adipose tissue| brain| dorsal root ganglion| ovary| pancreas| juvenile| adult	GO:0000122; GO:0001568; GO:0001570; GO:0003150; GO:0003151; GO:0003171; GO:0003184; GO:0003186; GO:0003195; GO:0003199; GO:0003208; GO:0003214; GO:0003215; GO:0003222; GO:0003300; GO:0006351; GO:0007219; GO:0007389; GO:0007507; GO:0009948; GO:0010460; GO:0010468; GO:0010629; GO:0010667; GO:0014031; GO:0014898; GO:0035910; GO:0035912; GO:0036304; GO:0045165; GO:0045607; GO:0045746; GO:0045892; GO:…	negative regulation of transcription from RNA polymerase II promoter; blood vessel development; vasculogenesis; muscular septum morphogenesis; outflow tract morphogenesis; atrioventricular valve development; pulmonary valve morphogenesis; tricuspid valve morphogenesis; tricuspid valve formation; endocardial cushion to mesenchymal transition involved in heart valve formation; cardiac ventricle mor…	GO:0005634; GO:0005737; GO:0016580; GO:0017053	nucleus; cytoplasm; Sin3 complex; transcriptional repressor complex	GO:0000983; GO:0001102; GO:0003677; GO:0003700; GO:0008134; GO:0035939; GO:0042826; GO:0043565; GO:0046983; GO:0000988; GO:0003674; GO:0005515	transcription factor activity, RNA polymerase II core promoter sequence-specific; RNA polymerase II activating transcription factor binding; DNA binding; transcription factor activity, sequence-specific DNA binding; transcription factor binding; microsatellite binding; histone deacetylase binding; sequence-specific DNA binding; protein dimerization activity; transcription factor activity, protein…		chr1	30633675	30643762	RefSeq; ENSEMBL	Rattus norvegicus hes-related family bHLH transcription factor with YRPW motif 2 (Hey2), mRNA.; hes-related family bHLH transcription factor with YRPW motif 2 [gene_biotype:protein_coding transcript_biotype:protein_coding]; cdna:genscan chromosome:Rnor_6.0:1:29191235:29199921:1 transcript_biotype:protein_coding	ENSRNOT00000018718	Pfam	1	main						o	o
107	17611176	nuclear receptor coactivator 7	Ncoa7			0.232057	up	0.162457	8.54521	8.31315	8.22471	8.19893	8.51583	8.54313	8.70206	8.39044	498995	XM_006222872///XM_006227758///XM_006227760///XM_008758675///XM_008774301///XM_008774302	F1LWN1			GO:0045944	positive regulation of transcription from RNA polymerase II promoter	GO:0005622	intracellular	GO:0030374; GO:0035257; GO:0005515	ligand-dependent nuclear receptor transcription coactivator activity; nuclear hormone receptor binding; protein binding		chr1	30734262	30826617	RefSeq; ENSEMBL; NONCODE	PREDICTED: Rattus norvegicus nuclear receptor coactivator 7 (Ncoa7), transcript variant X3, mRNA.; PREDICTED: Rattus norvegicus nuclear receptor coactivator 7 (Ncoa7), transcript variant X4, mRNA.; PREDICTED: Rattus norvegicus nuclear receptor coactivator 7 (Ncoa7), transcript variant X5, mRNA.; PREDICTED: Rattus norvegicus nuclear receptor coactivator 7 (Ncoa7), transcript variant X1, mRNA.; PRE…	ENSRNOT00000018849	Pfam	1	main
108	17611198					-0.247264	down	0.384848	5.86293	6.11019	6.26536	6.3035	5.76171	5.81737	6.20196	5.56945													chr1	30795285	30795418	ENSEMBL; NONCODE	5S ribosomal RNA [gene_biotype:rRNA transcript_biotype:rRNA]; Non-coding transcript identified by NONCODE			1	main
109	17611200	histidine triad nucleotide binding protein 3	Hint3	FQ215151	Rn.9467	-0.00500323	down	0.973336	8.06718	8.07218	7.95353	8.21328	8.04974	8.11999	8.24091	7.84065	246769	NM_001100825///NM_001276433	Q8K3P7; F1M9G8; A0A0G2K7W8	NM_001100825; NM_001276433; ENSRNOT00000019047; ENSRNOT00000088885; FQ215151	dorsal root ganglion| eye| heart| lung| ovary| pituitary gland| placenta| small intestine| adult	GO:0008152	metabolic process	GO:0005634; GO:0005730; GO:0005737; GO:0005739; GO:0070062	nucleus; nucleolus; cytoplasm; mitochondrion; extracellular exosome	GO:0000166; GO:0003824; GO:0016787	nucleotide binding; catalytic activity; hydrolase activity		chr1	30852993	30862852	RefSeq; ENSEMBL; GenBank; NONCODE	Rattus norvegicus histidine triad nucleotide binding protein 3 (Hint3), transcript variant 1, mRNA.; Rattus norvegicus histidine triad nucleotide binding protein 3 (Hint3), transcript variant 2, mRNA.; histidine triad nucleotide binding protein 3 [gene_biotype:protein_coding transcript_biotype:protein_coding]; Rattus norvegicus TL0ACA49YI17 mRNA sequence.; cdna:genscan chromosome:Rnor_6.0:1:29413…			1	main
110	17611207	tRNA methyltransferase 11 homolog	Trmt11	AF532978	Rn.214011	-0.0388007	down	0.865628	5.58641	5.62521	5.64794	5.61149	5.6162	5.15872	5.83538	5.76514	378794	NM_198051///XM_006227748///XM_006227749///XM_006227750///XM_006227751///XM_006227752///XM_008758673	Q7TNK6; F1MA13; A0A0G2JWR1	NM_198051; XM_006227748; XM_006227749; XM_006227750; XM_006227751; XM_006227752; XM_008758673; ENSRNOT00000019436; ENSRNOT00000083276; AF532978		GO:0008033; GO:0030488; GO:0032259	tRNA processing; tRNA methylation; methylation			GO:0000049; GO:0003676; GO:0004809; GO:0008168; GO:0003723; GO:0016740	tRNA binding; nucleic acid binding; tRNA (guanine-N2-)-methyltransferase activity; methyltransferase activity; RNA binding; transferase activity		chr1	30871695	30927014	RefSeq; ENSEMBL; GenBank; NONCODE	Rattus norvegicus tRNA methyltransferase 11 homolog (Trmt11), mRNA.; PREDICTED: Rattus norvegicus tRNA methyltransferase 11 homolog (S. cerevisiae) (Trmt11), transcript variant X1, mRNA.; PREDICTED: Rattus norvegicus tRNA methyltransferase 11 homolog (S. cerevisiae) (Trmt11), transcript variant X2, mRNA.; PREDICTED: Rattus norvegicus tRNA methyltransferase 11 homolog (S. cerevisiae) (Trmt11), tra…	ENSRNOT00000019436; ENSRNOT00000083276	Pfam	1	main
111	17611222					0.187047	up	0.249237	6.75566	6.56861	6.73126	6.39932	6.57525	6.91397	6.78361	6.56939													chr1	31139719	31140690	ENSEMBL	cdna:genscan chromosome:Rnor_6.0:1:29705166:29705848:1 transcript_biotype:protein_coding			3	main
112	17611225	centromere protein W	Cenpw	FQ220188	Rn.51	0.0157946	up	0.940236	6.1876	6.17181	5.96356	6.08338	6.46849	6.43784	6.0312	6.09376	689399	NM_001246319	A1L1L1	NM_001246319; FQ220188; ENSRNOT00000065677	adrenal gland| connective tissue| heart| pancreas| testis| thymus| fetus| juvenile| adult	GO:0000278; GO:0007059; GO:0007067; GO:0051276; GO:0051301; GO:0051382; GO:0007049	mitotic cell cycle; chromosome segregation; mitotic nuclear division; chromosome organization; cell division; kinetochore assembly; cell cycle	GO:0000775; GO:0000776; GO:0000777; GO:0005634; GO:0005694	chromosome, centromeric region; kinetochore; condensed chromosome kinetochore; nucleus; chromosome	GO:0003677; GO:0046982; GO:0005515	DNA binding; protein heterodimerization activity; protein binding		chr1	31347827	31352754	RefSeq; GenBank; ENSEMBL; NONCODE	Rattus norvegicus centromere protein W (Cenpw), mRNA.; Rattus norvegicus TL0ADA43YN18 mRNA sequence.; centromere protein W [gene_biotype:protein_coding transcript_biotype:protein_coding]; Non-coding transcript identified by NONCODE	ENSRNOT00000065677	Pfam	1	main					o			o
113	17611230					-0.080718	down	0.545318	9.59532	9.67604	9.67687	9.68546	9.66578	9.70643	9.35131	9.72822													chr1	31460274	31460396	ENSEMBL	Small nucleolar RNA SNORA17 [gene_biotype:snoRNA transcript_biotype:snoRNA]			3	main
114	17611232	R-spondin 3	Rspo3	EU030376	Rn.15751	0.435862	up	0.348578	5.96347	5.5276	6.01995	5.09938	5.46348	6.00428	5.40431	6.48181	498997	NM_001100990	A7LKE6	NM_001100990; ENSRNOT00000015395; EU030376	eye| kidney| adult	GO:0001525; GO:0060670; GO:0090263; GO:0008150	angiogenesis; branching involved in labyrinthine layer morphogenesis; positive regulation of canonical Wnt signaling pathway; biological_process	GO:0005576; GO:0005615; GO:0005575	extracellular region; extracellular space; cellular_component	GO:0001664; GO:0005102; GO:0005109; GO:0008201; GO:0003674	G-protein coupled receptor binding; receptor binding; frizzled binding; heparin binding; molecular_function		chr1	32115843	32198978	RefSeq; ENSEMBL; GenBank; NONCODE	Rattus norvegicus R-spondin 3 (Rspo3), mRNA.; R-spondin 3 [gene_biotype:protein_coding transcript_biotype:protein_coding]; Rattus norvegicus R-spondin 3-like protein mRNA, complete cds.; cdna:genscan chromosome:Rnor_6.0:1:30703885:30714250:1 transcript_biotype:protein_coding; cdna:genscan chromosome:Rnor_6.0:1:30750068:30765081:1 transcript_biotype:protein_coding; Non-coding transcript identified…			1	main
115	17611240					0.27993	up	0.0250013	3.80434	3.52441	3.50293	3.45388	3.61643	3.67774	3.88403	3.85126													chr1	32228136	32358438					1	main
116	17611246	ring finger protein 146	Rnf146	BC083675	Rn.16849	0.0193174	up	0.840642	6.61551	6.59619	6.72485	6.5446	6.51912	6.64885	6.49435	6.70333	308051	NM_001012060///XM_006227744///XM_006227745	Q5XIK5	NM_001012060; XM_006227744; XM_006227745; ENSRNOT00000015421; BC083675	adrenal gland| brain| connective tissue| dorsal root ganglion| eye| heart| kidney| liver| lung| placenta| prostate| testis|tailbud embryo| metamorphosing embryo| juvenile| adult	GO:0016055; GO:0042787; GO:0051865; GO:0070936; GO:0090263; GO:0016567	Wnt signaling pathway; protein ubiquitination involved in ubiquitin-dependent protein catabolic process; protein autoubiquitination; protein K48-linked ubiquitination; positive regulation of canonical Wnt signaling pathway; protein ubiquitination	GO:0005634; GO:0005829; GO:0005737	nucleus; cytosol; cytoplasm	GO:0004842; GO:0008270; GO:0016874; GO:0072572; GO:0046872	ubiquitin-protein transferase activity; zinc ion binding; ligase activity; poly-ADP-D-ribose binding; metal ion binding		chr1	32297192	32307789	RefSeq; ENSEMBL; GenBank; NONCODE	Rattus norvegicus ring finger protein 146 (Rnf146), mRNA.; PREDICTED: Rattus norvegicus ring finger protein 146 (Rnf146), transcript variant X1, mRNA.; PREDICTED: Rattus norvegicus ring finger protein 146 (Rnf146), transcript variant X2, mRNA.; ring finger protein 146 [gene_biotype:protein_coding transcript_biotype:protein_coding]; Rattus norvegicus ring finger protein 146, mRNA (cDNA clone MGC:9…	ENSRNOT00000015421	Pfam	1	main
117	17611251	predicted gene 9996 [Source:MGI Symbol;Acc:MGI:3642549]	Gm9996			0.0419218	up	0.860956	5.0367	4.99478	5.16096	4.93002	4.89336	4.93898	5.43626	4.73487			A0A0G2K3C2										chr1	32553286	32553624	ENSEMBL	predicted gene 9996 [gene_biotype:protein_coding transcript_biotype:protein_coding]			1	main
118	17611253					-0.145262	down	0.359227	2.34263	2.48789	2.50215	2.39114	2.57038	2.54698	2.1004	2.38052													chr1	32592280	32592395	ENSEMBL	Small nucleolar RNA SNORA17 [gene_biotype:snoRNA transcript_biotype:snoRNA]			3	main
119	17611255	similar to RIKEN cDNA 2310057J18	RGD1311933		Rn.214139	0.149829	up	0.487987	3.78011	3.63028	3.73685	3.60829	3.5457	4.13148	3.72099	3.48785	308056	XM_001059712///XM_217725	F1M171	XM_001059712; XM_217725; ENSRNOT00000016989	small intestine| adult			GO:0005615; GO:0070062	extracellular space; extracellular exosome				chr1	32835712	32851816	RefSeq; ENSEMBL	PREDICTED: Rattus norvegicus similar to RIKEN cDNA 2310057J18 (RGD1311933), mRNA.; similar to RIKEN cDNA 2310057J18 [gene_biotype:protein_coding transcript_biotype:protein_coding]; cdna:genscan chromosome:Rnor_6.0:1:31409579:31437224:1 transcript_biotype:protein_coding	ENSRNOT00000016989	Pfam	1	main
120	17611262					-0.175562	down	0.416461	5.29082	5.46638	5.66011	5.28583	5.45321	5.59977	5.05849	5.21421													chr1	32869587	32869833	ENSEMBL	Nuclear RNase P [gene_biotype:ribozyme transcript_biotype:ribozyme]			1	main
121	17611264	zinc finger protein 420-like	LOC100911237			0.298442	up	0.239605	5.7363	5.43786	5.61497	5.13574	5.56286	5.4656	5.74457	5.99872	100911237	XM_008758694///XM_008758695///XM_008758696///XM_008774306///XM_008774307///XM_008774308											chr1	32940492	32944397	RefSeq	PREDICTED: Rattus norvegicus zinc finger protein 420-like (LOC100911237), transcript variant X1, mRNA.; PREDICTED: Rattus norvegicus zinc finger protein 420-like (LOC100911237), transcript variant X2, mRNA.; PREDICTED: Rattus norvegicus zinc finger protein 420-like (LOC100911237), transcript variant X3, mRNA.			1	main
122	17611268	leucine rich repeat containing 14B	Lrrc14b	FQ217859	Rn.140570	0.0329095	up	0.769486	5.66745	5.63454	5.58097	5.67368	5.64898	5.84943	5.4997	5.65322	502225	NM_001109333	D3ZJ80	NM_001109333; ENSRNOT00000034704; FQ217859	heart| muscle| juvenile| adult								chr1	32957291	32961462	RefSeq; ENSEMBL; GenBank; NONCODE	Rattus norvegicus leucine rich repeat containing 14B (Lrrc14b), mRNA.; leucine rich repeat containing 14B [gene_biotype:protein_coding transcript_biotype:protein_coding]; Rattus norvegicus TL0ACA15YL24 mRNA sequence.; cdna:genscan chromosome:Rnor_6.0:1:31531143:31534272:1 transcript_biotype:protein_coding; Non-coding transcript identified by NONCODE			1	main
123	17611272	succinate dehydrogenase complex, subunit A, flavoprotein (Fp)	Sdha	AB072907	Rn.228607	-0.0946537	down	0.217079	10.1122	10.2068	10.2562	10.1937	10.1706	10.1706	9.99337	10.1725	157074	NM_130428	Q920L2	NM_130428; ENSRNOT00000018336; AB072907	adipose tissue| adrenal gland| brain| colon| connective tissue| dorsal root ganglion| eye| heart| kidney| liver| lung| muscle| ovary| pancreas| pineal gland| pituitary gland| placenta| prostate| small intestine| spleen| testis| thymus|tailbud embryo| metamorphosing embryo| fetus| juvenile| adult	GO:0006099; GO:0006105; GO:0007399; GO:0022904; GO:0055114; GO:0022900	tricarboxylic acid cycle; succinate metabolic process; nervous system development; respiratory electron transport chain; oxidation-reduction process; electron transport chain	GO:0005739; GO:0005743; GO:0005749; GO:0043209; GO:0016020	mitochondrion; mitochondrial inner membrane; mitochondrial respiratory chain complex II, succinate dehydrogenase complex (ubiquinone); myelin sheath; membrane	GO:0000104; GO:0008177; GO:0050660; GO:0016491; GO:0016627; GO:0005515	succinate dehydrogenase activity; succinate dehydrogenase (ubiquinone) activity; flavin adenine dinucleotide binding; oxidoreductase activity; oxidoreductase activity, acting on the CH-CH group of donors; protein binding	NM_130428 // GenMAPP // Electron_Transport_Chain///NM_130428 // GenMAPP // Krebs-TCA_Cycle///ENSRNOT00000018336 // GenMAPP // Electron_Transport_Chain///ENSRNOT00000018336 // GenMAPP // Krebs-TCA_Cycle///AB072907 // GenMAPP // Electron_Transport_Chain///AB072907 // GenMAPP // Krebs-TCA_Cycle	chr1	32971779	32996749	RefSeq; ENSEMBL; GenBank; NONCODE	Rattus norvegicus succinate dehydrogenase complex, subunit A, flavoprotein (Fp) (Sdha), mRNA.; succinate dehydrogenase complex, subunit A, flavoprotein (Fp) [gene_biotype:protein_coding transcript_biotype:protein_coding]; Rattus norvegicus SDHA mRNA for flavoprotein subunit of succinate-ubiquinone reductase, complete cds.; cdna:genscan chromosome:Rnor_6.0:1:31545672:31591016:1 transcript_biotype:…	ENSRNOT00000018336	Pfam	1	main
124	17611290	programmed cell death 6	Pdcd6	BC168744	Rn.104071	0.0330375	up	0.808108	8.29441	8.26137	8.28763	8.26986	8.22662	8.294	8.07628	8.51294	308061	NM_001107452///XM_006227784	B5DEP1; G3V7W1	NM_001107452; XM_006227784; ENSRNOT00000019735; BC168744	adrenal gland| connective tissue| dorsal root ganglion| embryonic tissue| eye| heart| kidney| liver| lung| ovary| pituitary gland| placenta| prostate| small intestine| spleen| thymus|tailbud embryo| metamorphosing embryo| fetus| juvenile| adult	GO:0001938; GO:0006508; GO:0006886; GO:0006915; GO:0006919; GO:0010595; GO:0030948; GO:0032007; GO:0034605; GO:0036324; GO:0043280; GO:0045766; GO:0051592; GO:0051898	positive regulation of endothelial cell proliferation; proteolysis; intracellular protein transport; apoptotic process; activation of cysteine-type endopeptidase activity involved in apoptotic process; positive regulation of endothelial cell migration; negative regulation of vascular endothelial growth factor receptor signaling pathway; negative regulation of TOR signaling; cellular response to h…	GO:0005634; GO:0005737; GO:0005783; GO:0031410; GO:0070062; GO:0070971	nucleus; cytoplasm; endoplasmic reticulum; cytoplasmic vesicle; extracellular exosome; endoplasmic reticulum exit site	GO:0004198; GO:0005509; GO:0042802; GO:0042803; GO:0043495; GO:0046983; GO:0048306; GO:0060090; GO:0005515	calcium-dependent cysteine-type endopeptidase activity; calcium ion binding; identical protein binding; protein homodimerization activity; protein anchor; protein dimerization activity; calcium-dependent protein binding; binding, bridging; protein binding		chr1	33002331	33017997	RefSeq; ENSEMBL; GenBank; NONCODE	Rattus norvegicus programmed cell death 6 (Pdcd6), mRNA.; PREDICTED: Rattus norvegicus programmed cell death 6 (Pdcd6), transcript variant X1, mRNA.; programmed cell death 6 [gene_biotype:protein_coding transcript_biotype:protein_coding]; Rattus norvegicus programmed cell death 6, mRNA (cDNA clone MGC:188846 IMAGE:6920123), complete cds.; cdna:genscan chromosome:Rnor_6.0:1:31545672:31591016:1 tra…	ENSRNOT00000019735	Pfam	1	main	o
125	17611299	aryl-hydrocarbon receptor repressor	Ahrr	AB174900|AY367561	Rn.145524	-0.24846	down	0.0458806	4.82846	5.07692	5.20778	4.98899	5.03399	4.77241	4.93967	4.77331	498999	NM_001024285	Q75NT5	NM_001024285; ENSRNOT00000019806; AB174900; AY367561	adult	GO:0000122; GO:0006351; GO:0009410; GO:0033235; GO:0045892; GO:0045944; GO:0006355; GO:0007165	negative regulation of transcription from RNA polymerase II promoter; transcription, DNA-templated; response to xenobiotic stimulus; positive regulation of protein sumoylation; negative regulation of transcription, DNA-templated; positive regulation of transcription from RNA polymerase II promoter; regulation of transcription, DNA-templated; signal transduction	GO:0005634; GO:0005737; GO:0034753	nucleus; cytoplasm; nuclear aryl hydrocarbon receptor complex	GO:0001191; GO:0003677; GO:0046983; GO:0004871	transcriptional repressor activity, RNA polymerase II transcription factor binding; DNA binding; protein dimerization activity; signal transducer activity		chr1	33029445	33123739	RefSeq; ENSEMBL; GenBank; NONCODE	Rattus norvegicus aryl-hydrocarbon receptor repressor (Ahrr), mRNA.; aryl-hydrocarbon receptor repressor [gene_biotype:protein_coding transcript_biotype:protein_coding]; Rattus norvegicus ahrr mRNA for AhR repressor, complete cds.; Rattus norvegicus aryl-hydrocarbon receptor repressor (Ahrr) mRNA, complete cds.; cdna:genscan chromosome:Rnor_6.0:1:31615729:31639906:1 transcript_biotype:protein_cod…	ENSRNOT00000019806	Pfam	1	main
126	17611311	exocyst complex component 3	Exoc3	BC097993|U32575	Rn.6753	0.0712755	up	0.0734075	7.82528	7.754	7.78894	7.745	7.72807	7.87086	7.81116	7.79382	252881	NM_001024964///XM_006227767///XM_006227768	Q62825	NM_001024964; XM_006227767; XM_006227768; ENSRNOT00000020251; ENSRNOT00000077740; BC097993; U32575	brain| connective tissue| eye| heart| liver| lung| placenta| spleen|tailbud embryo| metamorphosing embryo| juvenile| adult	GO:0006887; GO:0015031; GO:0051601; GO:0006810	exocytosis; protein transport; exocyst localization; transport	GO:0000145	exocyst	GO:0000149; GO:0005515	SNARE binding; protein binding		chr1	33126575	33156980	RefSeq; ENSEMBL; GenBank; NONCODE	Rattus norvegicus exocyst complex component 3 (Exoc3), mRNA.; PREDICTED: Rattus norvegicus exocyst complex component 3 (Exoc3), transcript variant X2, mRNA.; PREDICTED: Rattus norvegicus exocyst complex component 3 (Exoc3), transcript variant X1, mRNA.; exocyst complex component 3 [gene_biotype:protein_coding transcript_biotype:protein_coding]; Rattus norvegicus exocyst complex component 3, mRNA …	ENSRNOT00000020251; ENSRNOT00000077740	Pfam	1	main
127	17611325	centrosomal protein 72	Cep72			-0.294624	down	0.0690868	4.28611	4.58074	4.58587	4.69317	4.46317	4.31417	4.10204	4.44212	308064	XM_001056326///XM_006222875///XM_006222876///XM_006227800///XM_006227801///XM_008758697///XM_008774309///XM_217737	D3ZVQ1			GO:0007051; GO:0033566	spindle organization; gamma-tubulin complex localization	GO:0005813	centrosome	GO:0042802	identical protein binding		chr1	33259588	33289500	RefSeq; ENSEMBL; NONCODE	PREDICTED: Rattus norvegicus centrosomal protein 72 (Cep72), transcript variant X4, mRNA.; PREDICTED: Rattus norvegicus centrosomal protein 72 (Cep72), transcript variant X2, mRNA.; PREDICTED: Rattus norvegicus centrosomal protein 72 (Cep72), transcript variant X3, mRNA.; PREDICTED: Rattus norvegicus centrosomal protein 72 (Cep72), transcript variant X1, mRNA.; centrosomal protein 72 [gene_biotyp…	ENSRNOT00000020780	Pfam	1	main					o
128	17611337	thyroid hormone receptor interactor 13	Trip13	BC083900	Rn.11751	-0.0463956	down	0.422971	5.14571	5.1921	5.27069	5.11525	5.19037	5.09309	5.17036	5.17368	292206	NM_001011930///XM_008758681	Q5XHZ9	NM_001011930; XM_008758681; ENSRNOT00000021532; ENSRNOT00000081471; BC083900	embryonic tissue| heart| liver| lung| ovary| pancreas| placenta| prostate| testis|tailbud embryo| adult	GO:0001556; GO:0006302; GO:0007130; GO:0007131; GO:0007141; GO:0007144; GO:0007283; GO:0007286; GO:0048477; GO:0030154; GO:0051321	oocyte maturation; double-strand break repair; synaptonemal complex assembly; reciprocal meiotic recombination; male meiosis I; female meiosis I; spermatogenesis; spermatid development; oogenesis; cell differentiation; meiotic cell cycle	GO:0001673	male germ cell nucleus	GO:0005524; GO:0042802; GO:0000166; GO:0005515	ATP binding; identical protein binding; nucleotide binding; protein binding		chr1	33392427	33437368	RefSeq; ENSEMBL; GenBank; NONCODE	Rattus norvegicus thyroid hormone receptor interactor 13 (Trip13), mRNA.; PREDICTED: Rattus norvegicus thyroid hormone receptor interactor 13 (Trip13), transcript variant X1, mRNA.; thyroid hormone receptor interactor 13 [gene_biotype:protein_coding transcript_biotype:protein_coding]; Rattus norvegicus thyroid hormone receptor interactor 13, mRNA (cDNA clone MGC:95258 IMAGE:7133557), complete cds…	ENSRNOT00000021532; ENSRNOT00000081471	Pfam	1	main					o	o	o
129	17611354	naked cuticle homolog 2 (Drosophila)	Nkd2		Rn.198099	0.060926	up	0.539511	6.76004	6.69912	6.71999	6.76604	6.61133	6.91201	6.64984	6.71828	308068	NM_001107454///XM_008758691///XM_008758692///XM_008758693	D4A182	NM_001107454; XM_008758691; XM_008758692; XM_008758693; ENSRNOT00000021898	brain| eye| lung| pancreas| prostate| juvenile| adult	GO:0010954; GO:0030178; GO:0032436; GO:0048210; GO:0072661; GO:0090004; GO:0090090	positive regulation of protein processing; negative regulation of Wnt signaling pathway; positive regulation of proteasomal ubiquitin-dependent protein catabolic process; Golgi vesicle fusion to target membrane; protein targeting to plasma membrane; positive regulation of establishment of protein localization to plasma membrane; negative regulation of canonical Wnt signaling pathway	GO:0005737; GO:0016323; GO:0016328; GO:0031410; GO:0071944	cytoplasm; basolateral plasma membrane; lateral plasma membrane; cytoplasmic vesicle; cell periphery	GO:0005509; GO:0019838; GO:0031625; GO:0005515	calcium ion binding; growth factor binding; ubiquitin protein ligase binding; protein binding		chr1	33482721	33509561	RefSeq; ENSEMBL; NONCODE	Rattus norvegicus naked cuticle homolog 2 (Drosophila) (Nkd2), mRNA.; PREDICTED: Rattus norvegicus naked cuticle homolog 2 (Drosophila) (Nkd2), transcript variant X1, mRNA.; PREDICTED: Rattus norvegicus naked cuticle homolog 2 (Drosophila) (Nkd2), transcript variant X2, mRNA.; PREDICTED: Rattus norvegicus naked cuticle homolog 2 (Drosophila) (Nkd2), transcript variant X3, mRNA.; naked cuticle hom…			1	main
130	17611366	solute carrier family 6 (neutral amino acid transporter), member 19	Slc6a19	AJ890206|EF474455	Rn.213283	0.0316541	up	0.781384	5.59542	5.56377	5.5412	5.4178	5.7323	5.50957	5.57934	5.69736	664630	NM_001039722	Q2A865	NM_001039722; ENSRNOT00000036714; AJ890206; EF474455	kidney| small intestine| adult	GO:0003333; GO:0006836; GO:0007584; GO:0015804; GO:0006810; GO:0006865; GO:0055085	amino acid transmembrane transport; neurotransmitter transport; response to nutrient; neutral amino acid transport; transport; amino acid transport; transmembrane transport	GO:0005887; GO:0031526; GO:0070062; GO:0005575; GO:0016020; GO:0016021	integral component of plasma membrane; brush border membrane; extracellular exosome; cellular_component; membrane; integral component of membrane	GO:0005328; GO:0015175; GO:0003674; GO:0015293; GO:0005515	neurotransmitter:sodium symporter activity; neutral amino acid transmembrane transporter activity; molecular_function; symporter activity; protein binding		chr1	33624551	33643498	RefSeq; ENSEMBL; GenBank; NONCODE	Rattus norvegicus solute carrier family 6 (neutral amino acid transporter), member 19 (Slc6a19), mRNA.; solute carrier family 6 (neutral amino acid transporter), member 19 [gene_biotype:protein_coding transcript_biotype:protein_coding]; Rattus norvegicus mRNA for transporter for neutral amino acids (B0at1 gene).; Rattus norvegicus amino acid transporter B0AT1 mRNA, complete cds.; cdna:genscan chr…	ENSRNOT00000036714	Pfam	1	main
131	17611384	solute carrier family 6 (neutral amino acid transporter), member 18	Slc6a18	BC083562|U12973	Rn.9998	0.189844	up	0.242121	5.59759	5.40775	5.26347	5.27931	5.68046	5.56286	5.64203	5.58787	29323	NM_017163///XM_006227772///XM_006227774///XM_006227775///XM_008758682	Q62687; Q5XIV7; G3V847	NM_017163; XM_006227772; XM_006227774; XM_006227775; XM_008758682; ENSRNOT00000022346; ENSRNOT00000089941; BC083562; U12973	kidney| juvenile	GO:0003333; GO:0006836; GO:0006970; GO:0006972; GO:0055085; GO:0006810; GO:0006865	amino acid transmembrane transport; neurotransmitter transport; response to osmotic stress; hyperosmotic response; transmembrane transport; transport; amino acid transport	GO:0005886; GO:0005887; GO:0031526; GO:0016020; GO:0016021	plasma membrane; integral component of plasma membrane; brush border membrane; membrane; integral component of membrane	GO:0005328; GO:0015171; GO:0015293; GO:0005515	neurotransmitter:sodium symporter activity; amino acid transmembrane transporter activity; symporter activity; protein binding		chr1	33646636	33660461	RefSeq; ENSEMBL; GenBank; NONCODE	Rattus norvegicus solute carrier family 6 (neutral amino acid transporter), member 18 (Slc6a18), mRNA.; PREDICTED: Rattus norvegicus solute carrier family 6 (neutral amino acid transporter), member 18 (Slc6a18), transcript variant X2, mRNA.; PREDICTED: Rattus norvegicus solute carrier family 6 (neutral amino acid transporter), member 18 (Slc6a18), transcript variant X3, mRNA.; PREDICTED: Rattus n…	ENSRNOT00000022346; ENSRNOT00000089941	Pfam	1	main
132	17611401					-0.122256	down	0.353861	3.62124	3.7435	3.95527	3.62537	3.64984	3.52427	3.67048	3.66897													chr1	33831804	33840822					1	main
133	17611410					0.0663263	up	0.60113	9.85734	9.79101	9.68161	9.89644	9.79499	9.8387	10.0377	9.69558		XM_008758139///XM_008758140											chr2	175780316	176543841	RefSeq	PREDICTED: Rattus norvegicus T-cell activation Rho GTPase-activating protein-like (LOC103690382), mRNA.; PREDICTED: Rattus norvegicus CD99 antigen-like protein 2-like (LOC102557071), transcript variant X1, mRNA.			3	main
134	17611414	protein phosphatase 1, regulatory (inhibitor) subunit 14c	Ppp1r14c	AF407168|BC086978	Rn.87667	0.147064	up	0.0660173	6.10029	5.95322	6.03144	5.85182	5.9764	6.08171	6.06999	6.14916	171010	NM_133425	Q8R4R9	NM_133425; ENSRNOT00000022046; AF407168; BC086978	brain| heart| nerve| prostate| juvenile| adult	GO:0042325; GO:0043086	regulation of phosphorylation; negative regulation of catalytic activity	GO:0005737; GO:0012505; GO:0016020	cytoplasm; endomembrane system; membrane	GO:0004865; GO:0004864	protein serine/threonine phosphatase inhibitor activity; protein phosphatase inhibitor activity		chr1	41159898	41272185	RefSeq; ENSEMBL; GenBank; NONCODE	Rattus norvegicus protein phosphatase 1, regulatory (inhibitor) subunit 14c (Ppp1r14c), mRNA.; protein phosphatase 1, regulatory (inhibitor) subunit 14c [gene_biotype:protein_coding transcript_biotype:protein_coding]; Rattus norvegicus PKC-potentiated PP1 inhibitory protein (Kepi) mRNA, complete cds.; Rattus norvegicus protein phosphatase 1, regulatory (inhibitor) subunit 14c, mRNA (cDNA clone MG…	ENSRNOT00000022046	Pfam	1	main
135	17611421	iodotyrosine deiodinase	Iyd	BC091241	Rn.34836	0.212889	up	0.142232	5.13473	4.92184	4.95006	4.78043	5.03504	5.21609	5.23226	4.95584	308129	NM_001025000	Q5BK17	NM_001025000; ENSRNOT00000021895; BC091241	liver| prostate| small intestine| juvenile| adult	GO:0055114	oxidation-reduction process	GO:0016021; GO:0016020	integral component of membrane; membrane	GO:0004447; GO:0016491; GO:0005515	iodide peroxidase activity; oxidoreductase activity; protein binding		chr1	41435347	41449800	RefSeq; ENSEMBL; GenBank; NONCODE	Rattus norvegicus iodotyrosine deiodinase (Iyd), mRNA.; iodotyrosine deiodinase [gene_biotype:protein_coding transcript_biotype:protein_coding]; Rattus norvegicus iodotyrosine deiodinase, mRNA (cDNA clone MGC:109018 IMAGE:7326298), complete cds.; cdna:genscan chromosome:Rnor_6.0:1:40086522:40100453:1 transcript_biotype:protein_coding; Non-coding transcript identified by NONCODE	ENSRNOT00000021895	Pfam	1	main
136	17611428	pleckstrin homology domain containing, family G (with RhoGef domain) member 1	Plekhg1		Rn.225479	-0.383715	down	0.0316249	7.50925	7.89296	8.03655	7.85713	7.78521	7.37727	7.46471	7.68576	679812	NM_001190999///XM_006227838///XM_006227841///XM_006227842///XM_006227844///XM_008758706///XM_008758707	D4AE81	NM_001190999; XM_006227838; XM_006227841; XM_006227842; XM_006227844; XM_008758706; XM_008758707; ENSRNOT00000021471	brain| lung	GO:0035023; GO:0043547	regulation of Rho protein signal transduction; positive regulation of GTPase activity			GO:0005089	Rho guanyl-nucleotide exchange factor activity		chr1	41780838	41866419	RefSeq; ENSEMBL	Rattus norvegicus pleckstrin homology domain containing, family G (with RhoGef domain) member 1 (Plekhg1), mRNA.; PREDICTED: Rattus norvegicus pleckstrin homology domain containing, family G (with RhoGef domain) member 1 (Plekhg1), transcript variant X1, mRNA.; PREDICTED: Rattus norvegicus pleckstrin homology domain containing, family G (with RhoGef domain) member 1 (Plekhg1), transcript variant …	ENSRNOT00000021471	Pfam	1	main
137	17611443	methylenetetrahydrofolate dehydrogenase (NADP+ dependent) 1-like	Mthfd1l	BC166462	Rn.18065	-0.0785955	down	0.775606	6.55936	6.63795	6.84463	6.5179	6.55133	6.09708	6.87218	6.70881	361472	NM_001108462	B2GUZ3	NM_001108462; ENSRNOT00000026564; BC166462	brain| connective tissue| dorsal root ganglion| embryonic tissue| lung| ovary| prostate| testis|tailbud embryo| fetus| juvenile| adult	GO:0001843; GO:0006730; GO:0006760; GO:0009396; GO:0015942; GO:0046653; GO:0048702; GO:0048703; GO:0055114; GO:0008150	neural tube closure; one-carbon metabolic process; folic acid-containing compound metabolic process; folic acid-containing compound biosynthetic process; formate metabolic process; tetrahydrofolate metabolic process; embryonic neurocranium morphogenesis; embryonic viscerocranium morphogenesis; oxidation-reduction process; biological_process	GO:0005739; GO:0005829; GO:0016020; GO:0005575	mitochondrion; cytosol; membrane; cellular_component	GO:0004329; GO:0004477; GO:0004488; GO:0005524; GO:0042803; GO:0003674; GO:0003824	formate-tetrahydrofolate ligase activity; methenyltetrahydrofolate cyclohydrolase activity; methylenetetrahydrofolate dehydrogenase (NADP+) activity; ATP binding; protein homodimerization activity; molecular_function; catalytic activity		chrUn	0	209109	RefSeq; ENSEMBL; GenBank; NONCODE	Rattus norvegicus methylenetetrahydrofolate dehydrogenase (NADP+ dependent) 1-like (Mthfd1l), mRNA.; methylenetetrahydrofolate dehydrogenase (NADP+ dependent) 1-like [gene_biotype:protein_coding transcript_biotype:protein_coding]; Rattus norvegicus methylenetetrahydrofolate dehydrogenase (NADP+ dependent) 1-like, mRNA (cDNA clone MGC:187798 IMAGE:9030223), complete cds.; cdna:genscan chromosome:R…	ENSRNOT00000026564	Pfam	1	main
138	17611477					-0.0692856	down	0.485354	4.53854	4.60782	4.52168	4.66671	4.63509	4.62498	4.38129	4.60933													chr1	42019178	42019340	ENSEMBL; NONCODE	U1 spliceosomal RNA [gene_biotype:snRNA transcript_biotype:snRNA]; Non-coding transcript identified by NONCODE			1	main
139	17611479					-0.0679205	down	0.461241	4.59456	4.66248	4.63931	4.77727	4.57085	4.62107	4.67772	4.48488													chr1	42119714	42121441	ENSEMBL	cdna:genscan chromosome:Rnor_6.0:1:40751102:40862696:1 transcript_biotype:protein_coding			1	main
140	17611483	A kinase (PRKA) anchor protein 12	Akap12	AY695056|AY695057|AY695058|U41453	Rn.122094	0.101632	up	0.192863	8.73643	8.6348	8.64342	8.6765	8.58447	8.67198	8.68275	8.85456	83425	NM_001033653///NM_057103///XM_006227847///XM_006227848	Q5QD51; E9PU09	NM_001033653; NM_057103; XM_006227847; XM_006227848; ENSRNOT00000026482; ENSRNOT00000060767; ENSRNOT00000083702; AY695056; AY695057; AY695058; U41453	adipose tissue| brain| colon| dorsal root ganglion| embryonic tissue| eye| lung| ovary| prostate| spleen| testis|tailbud embryo| metamorphosing embryo| fetus| juvenile| adult	GO:0006605; GO:0007165; GO:0010739; GO:0016310; GO:0030819; GO:0090036	protein targeting; signal transduction; positive regulation of protein kinase A signaling; phosphorylation; positive regulation of cAMP biosynthetic process; regulation of protein kinase C signaling	GO:0005622; GO:0005737; GO:0005856; GO:0005886; GO:0005925; GO:0016020	intracellular; cytoplasm; cytoskeleton; plasma membrane; focal adhesion; membrane	GO:0008179; GO:0016301; GO:0051018; GO:0005515	adenylate cyclase binding; kinase activity; protein kinase A binding; protein binding		chr1	42162163	42252615	RefSeq; ENSEMBL; GenBank; NONCODE	Rattus norvegicus A kinase (PRKA) anchor protein 12 (Akap12), transcript variant 2, mRNA.; Rattus norvegicus A kinase (PRKA) anchor protein 12 (Akap12), transcript variant 1, mRNA.; PREDICTED: Rattus norvegicus A kinase (PRKA) anchor protein 12 (Akap12), transcript variant X1, mRNA.; PREDICTED: Rattus norvegicus A kinase (PRKA) anchor protein 12 (Akap12), transcript variant X2, mRNA.; A kinase (P…	ENSRNOT00000026482; ENSRNOT00000060767; ENSRNOT00000083702	Pfam	1	main
141	17611493	acidic residue methyltransferase 1	Armt1	BC078920	Rn.50425	-0.0447972	down	0.552093	6.39251	6.43731	6.43848	6.37284	6.50061	6.28509	6.48602	6.40643	292267	NM_001017447///XM_006227833	Q6AYT5	NM_001017447; XM_006227833; ENSRNOT00000026367; BC078920	adrenal gland| brain| connective tissue| heart| kidney| liver| lung| pancreas| spleen| testis| thymus| juvenile| adult	GO:0006479; GO:0006974; GO:0032259; GO:2001020	protein methylation; cellular response to DNA damage stimulus; methylation; regulation of response to DNA damage stimulus			GO:0008757; GO:0019899; GO:0051998; GO:0008168; GO:0016740; GO:0005515	S-adenosylmethionine-dependent methyltransferase activity; enzyme binding; protein carboxyl O-methyltransferase activity; methyltransferase activity; transferase activity; protein binding		chrUn	0	25313	RefSeq; ENSEMBL; GenBank; NONCODE	Rattus norvegicus acidic residue methyltransferase 1 (Armt1), mRNA.; PREDICTED: Rattus norvegicus similar to RIKEN cDNA 1700052N19 (RGD1305235), transcript variant X1, mRNA.; acidic residue methyltransferase 1 [gene_biotype:protein_coding transcript_biotype:protein_coding]; Rattus norvegicus similar to RIKEN cDNA 1700052N19, mRNA (cDNA clone MGC:93699 IMAGE:7096641), complete cds.; cdna:genscan c…	ENSRNOT00000026367	Pfam	1	main
142	17611501					-0.277581	down	0.223013	5.4396	5.71718	5.91937	5.72288	5.50929	5.15011	5.50437	5.66431													chr1	42346067	42346204	ENSEMBL; NONCODE	Small nucleolar RNA SNORA73 family [gene_biotype:snoRNA transcript_biotype:snoRNA]; Non-coding transcript identified by NONCODE			1	main
143	17611503	coiled-coil domain containing 170	Ccdc170			-0.0379046	down	0.873172	6.58017	6.61808	6.90663	6.51888	6.42872	6.91364	6.381	6.44587	292266	XM_001065531///XM_008758712///XM_008758717///XM_008758718///XM_008758719///XM_008774325///XM_214760	F1LT05							GO:0005515	protein binding		chrUn	0	93905	RefSeq; ENSEMBL; NONCODE	PREDICTED: Rattus norvegicus coiled-coil domain containing 170 (Ccdc170), transcript variant X1, mRNA.; PREDICTED: Rattus norvegicus coiled-coil domain containing 170 (Ccdc170), transcript variant X4, mRNA.; PREDICTED: Rattus norvegicus coiled-coil domain containing 170 (Ccdc170), transcript variant X5, mRNA.; PREDICTED: Rattus norvegicus coiled-coil domain containing 170 (Ccdc170), transcript va…			1	main
144	17611516	estrogen receptor 1	Esr1	AB477039|KJ746832|KJ746833|X61098|X98237	Rn.10595	-0.0315829	down	0.767331	5.00482	5.0364	4.93854	4.94803	5.22264	5.02095	5.05684	4.93668	24890	NM_012689///XM_006227832///XM_008758703///XM_008758704	P06211; D0FYH4; F2VIP9; A0A0G2K0D4; A0A0G2K1T9; A0A0G2JZG2; A0A068JIX3; A0A068JFJ9	NM_012689; XM_006227832; XM_008758703; XM_008758704; ENSRNOT00000026350; ENSRNOT00000078494; ENSRNOT00000081017; ENSRNOT00000082133; ENSRNOT00000088168; ENSRNOT00000088678; AB477039; KJ746832; KJ746833; OTTRNOT00000002098; OTTRNOT00000002102; OTTRNOT00000002103; X61098; X98237	ovary							NM_012689 // GenMAPP // Nuclear_Receptors///XM_006227832 // GenMAPP // Nuclear_Receptors///XM_008758703 // GenMAPP // Nuclear_Receptors///XM_008758704 // GenMAPP // Nuclear_Receptors///ENSRNOT00000026350 // GenMAPP // Nuclear_Receptors///ENSRNOT00000078494 // GenMAPP // Nuclear_Receptors///ENSRNOT00000081017 // GenMAPP // Nuclear_Receptors///ENSRNOT00000082133 // GenMAPP // Nuclear_Receptors///EN…	chrUn	0	436213	RefSeq; ENSEMBL; GenBank; Havana transcript; NONCODE	Rattus norvegicus estrogen receptor 1 (Esr1), mRNA.; PREDICTED: Rattus norvegicus estrogen receptor 1 (Esr1), transcript variant X3, mRNA.; PREDICTED: Rattus norvegicus estrogen receptor 1 (Esr1), transcript variant X1, mRNA.; PREDICTED: Rattus norvegicus estrogen receptor 1 (Esr1), transcript variant X2, mRNA.; estrogen receptor 1 [gene_biotype:protein_coding transcript_biotype:protein_coding]; …	ENSRNOT00000026350; ENSRNOT00000078494; ENSRNOT00000081017; ENSRNOT00000088168; OTTRNOT00000002098	Pfam	1	main						o	o				o	o
145	17611526					0.141529	up	0.475484	7.1204	6.97887	6.8996	7.05693	6.98008	7.45214	6.86297	7.04609													chr1	42993375	43018358	NONCODE	Non-coding transcript identified by NONCODE			1	main
146	17611530					0.105333	up	0.335303	2.50136	2.39603	2.43917	2.50906	2.23986	2.59952	2.48478	2.41979													chr1	43258192	43258295	ENSEMBL	U6 spliceosomal RNA [gene_biotype:snRNA transcript_biotype:snRNA]			1	main
147	17611532					-0.171485	down	0.561949	5.89541	6.06689	5.84767	6.58063	5.77238	6.06545	5.82082	5.79994													chrUn	0	924	ENSEMBL	cdna:genscan chromosome:Rnor_6.0:1:41983576:41984145:1 transcript_biotype:protein_coding			3	main
148	17611535	myc target 1	Myct1		Rn.55418	0.0638798	up	0.567006	4.64791	4.58403	4.59768	4.5773	4.57711	4.80624	4.45653	4.68096	292264	NM_001106207	D3ZUL5	NM_001106207; ENSRNOT00000025616; OTTRNOT00000002099	heart| muscle			GO:0016021; GO:0016020	integral component of membrane; membrane				chrUn	0	11274	RefSeq; ENSEMBL; Havana transcript; NONCODE	Rattus norvegicus myc target 1 (Myct1), mRNA.; myc target 1 [gene_biotype:protein_coding transcript_biotype:protein_coding]; myc target 1[gene_biotype:protein_coding transcript_biotype:protein_coding]; cdna:genscan chromosome:Rnor_6.0:1:42129599:42131260:1 transcript_biotype:protein_coding; Non-coding transcript identified by NONCODE	ENSRNOT00000025616	Pfam	1	main
149	17611540	vasoactive intestinal peptide	Vip	AB089807|AB089808|AB089809|BC158798	Rn.18675	0.0550611	up	0.775279	5.11949	5.06443	5.16324	4.97396	5.0561	4.80138	5.39079	5.16631	117064	NM_053991///XM_006227827///XM_006227828	P01283; B0BNF3; A0A090BZQ0	NM_053991; XM_006227827; XM_006227828; ENSRNOT00000025477; AB089807; AB089808; AB089809; BC158798	brain| dorsal root ganglion| juvenile| adult	GO:0001878; GO:0001938; GO:0007611; GO:0009966; GO:0010579; GO:0019731; GO:0019732; GO:0032880; GO:0043066; GO:0043267; GO:0045087; GO:0045732; GO:0045909; GO:0048255; GO:0048662; GO:0050829; GO:0050830; GO:0051930; GO:0060406; GO:0070459	response to yeast; positive regulation of endothelial cell proliferation; learning or memory; regulation of signal transduction; positive regulation of adenylate cyclase activity involved in G-protein coupled receptor signaling pathway; antibacterial humoral response; antifungal humoral response; regulation of protein localization; negative regulation of apoptotic process; negative regulation of …	GO:0005576; GO:0043025	extracellular region; neuronal cell body	GO:0005102; GO:0005179; GO:0005515	receptor binding; hormone activity; protein binding		chr1	43498384	43506465	RefSeq; ENSEMBL; GenBank; NONCODE	Rattus norvegicus vasoactive intestinal peptide (Vip), mRNA.; PREDICTED: Rattus norvegicus vasoactive intestinal peptide (Vip), transcript variant X1, mRNA.; PREDICTED: Rattus norvegicus vasoactive intestinal peptide (Vip), transcript variant X2, mRNA.; vasoactive intestinal peptide [gene_biotype:protein_coding transcript_biotype:protein_coding]; Rattus norvegicus vip/phi27 mRNA for vasoactive in…	ENSRNOT00000025477	Pfam	1	main		o
150	17611549					0.00724967	up	0.968083	9.50496	9.49771	9.47475	9.65383	9.36455	9.59986	9.70026	9.21475													chr1	43807087	43807166	ENSEMBL	Small nucleolar RNA U2-19 [gene_biotype:snoRNA transcript_biotype:snoRNA]			3	main
151	17611551					0.0307061	up	0.899372	8.24494	8.21424	7.92981	8.66212	8.05079	8.27617	8.19595	8.26271													chr1	43807309	43807378	ENSEMBL	Small nucleolar RNA U2-30 [gene_biotype:snoRNA transcript_biotype:snoRNA]			3	main
152	17611553					-0.0433071	down	0.665787	5.19712	5.24043	5.31127	5.24448	5.16553	5.13642	5.36118	5.09375													chr1	44324466	44324750	ENSEMBL	cdna:genscan chromosome:Rnor_6.0:1:42968087:42992943:-1 transcript_biotype:protein_coding			1	main
153	17611555	opioid receptor, mu 1	Oprm1	AY225402|AY225403|AY309000|AY309002|AY309003|AY309004|D16349|DQ680043|EU024650|EU024651|EU024652|EU340244|EU340245|EU340246|FJ041289|HQ699463|L13069|L20684|L22455|U02083|U35424	Rn.10118	0.20906	up	0.545638	5.62537	5.41631	5.27448	5.46715	5.50729	6.11843	5.70084	5.05684	25601	NM_001038597///NM_001038599///NM_001038600///NM_001038601///NM_001304733///NM_001304734///NM_001304735///NM_001304736///NM_001304737///NM_001304738///NM_001304740///NM_013071///NR_027877///XM_008758731	P33535; B8Q1M0; D2CKI4; G8XRH3; D2CKI5; B8K2Q4; G9BXT6; F1MAN5	NM_001038597; NM_001038599; NM_001038600; NM_001038601; NM_001304733; NM_001304734; NM_001304735; NM_001304736; NM_001304737; NM_001304738; NM_001304740; NM_013071; NR_027877; XM_008758731; ENSRNOT00000024682; ENSRNOT00000045144; ENSRNOT00000051837; ENSRNOT00000077168; ENSRNOT00000079390; ENSRNOT00000079628; ENSRNOT00000082455; ENSRNOT00000083308; ENSRNOT00000084099; ENSRNOT00000085873; ENSRNOT00…	adult							NM_001038597 // GenMAPP // GPCRDB_Class_A_Rhodopsin-like///NM_001038597 // GenMAPP // Peptide_GPCRs///NM_001038599 // GenMAPP // GPCRDB_Class_A_Rhodopsin-like///NM_001038599 // GenMAPP // Peptide_GPCRs///NM_001038600 // GenMAPP // GPCRDB_Class_A_Rhodopsin-like///NM_001038600 // GenMAPP // Peptide_GPCRs///NM_001038601 // GenMAPP // GPCRDB_Class_A_Rhodopsin-like///NM_001038601 // GenMAPP // Peptide…	chrUn	0	264531	RefSeq; ENSEMBL; GenBank; Havana transcript; NONCODE	Rattus norvegicus opioid receptor, mu 1 (Oprm1), transcript variant MOR-1A, mRNA.; Rattus norvegicus opioid receptor, mu 1 (Oprm1), transcript variant MOR-1B2, mRNA.; Rattus norvegicus opioid receptor, mu 1 (Oprm1), transcript variant MOR-1C1, mRNA.; Rattus norvegicus opioid receptor, mu 1 (Oprm1), transcript variant MOR-1C2, mRNA.; Rattus norvegicus opioid receptor, mu 1 (Oprm1), transcript vari…	ENSRNOT00000024682; ENSRNOT00000045144; ENSRNOT00000051837; ENSRNOT00000079628; ENSRNOT00000083308; ENSRNOT00000092034; OTTRNOT00000003023; OTTRNOT00000003024; OTTRNOT00000003025; OTTRNOT00000003026	Pfam	1	main		o					o					o
154	17611575	SR-related CTD-associated factor 8	Scaf8	U49055	Rn.10529	-0.0324703	down	0.493341	8.39967	8.43214	8.44278	8.46821	8.38542	8.47021	8.37133	8.35747	245926	NM_139094///XM_006227858	Q63623; F1LPT8; A0A0G2K5M7	NM_139094; XM_006227858; ENSRNOT00000065733; ENSRNOT00000083425; U49055	adipose tissue| brain| connective tissue| embryonic tissue| heart| liver| lung| muscle| ovary| pancreas| pituitary gland| prostate| thymus| metamorphosing embryo| juvenile| adult	GO:0006366; GO:0006397; GO:0008380	transcription from RNA polymerase II promoter; mRNA processing; RNA splicing	GO:0005654; GO:0005681; GO:0016363; GO:0005634	nucleoplasm; spliceosomal complex; nuclear matrix; nucleus	GO:0000166; GO:0003676; GO:0003723; GO:0019904; GO:0043175; GO:0070063	nucleotide binding; nucleic acid binding; RNA binding; protein domain specific binding; RNA polymerase core enzyme binding; RNA polymerase binding		chr1	45348476	45451205	RefSeq; ENSEMBL; GenBank	Rattus norvegicus SR-related CTD-associated factor 8 (Scaf8), mRNA.; PREDICTED: Rattus norvegicus SR-related CTD-associated factor 8 (Scaf8), transcript variant X1, mRNA.; SR-related CTD-associated factor 8 [gene_biotype:protein_coding transcript_biotype:protein_coding]; Rattus norvegicus CTD-binding SR-like protein rA8 mRNA, complete cds.; cdna:genscan chromosome:Rnor_6.0:1:44027090:44119969:1 t…	ENSRNOT00000065733; ENSRNOT00000083425	Pfam	1	main
155	17611600	T-cell lymphoma invasion and metastasis 2	Tiam2			-0.012704	down	0.917765	6.14028	6.15298	6.26688	6.04444	6.14763	6.32269	5.99689	6.10126	100362710	XM_006222901///XM_006222904///XM_006227902///XM_006227904///XM_008758738///XM_008774327	D3ZMS5			GO:0035023; GO:0035556; GO:0043547; GO:0007165	regulation of Rho protein signal transduction; intracellular signal transduction; positive regulation of GTPase activity; signal transduction	GO:0005737; GO:0016020; GO:0070062	cytoplasm; membrane; extracellular exosome	GO:0005057; GO:0005085; GO:0005089; GO:0005096; GO:0005515	receptor signaling protein activity; guanyl-nucleotide exchange factor activity; Rho guanyl-nucleotide exchange factor activity; GTPase activator activity; protein binding		chrUn	0	116970	RefSeq; ENSEMBL; NONCODE	PREDICTED: Rattus norvegicus T-cell lymphoma invasion and metastasis 2 (LOC100362710), transcript variant X1, mRNA.; PREDICTED: Rattus norvegicus T-cell lymphoma invasion and metastasis 2 (LOC100362710), transcript variant X2, mRNA.; PREDICTED: Rattus norvegicus T-cell lymphoma invasion and metastasis 2 (LOC100362710), transcript variant X3, mRNA.; T-cell lymphoma invasion and metastasis 2 [gene_…	ENSRNOT00000065386	Pfam	1	main
156	17611629	claudin 20	Cldn20		Rn.198106	0.0207594	up	0.87455	4.0724	4.05164	3.83136	4.1756	4.14796	4.12945	3.96236	4.12538	680178	NM_001109394	D3ZT28	NM_001109394; ENSRNOT00000030132	connective tissue| eye| adult			GO:0005886; GO:0005923; GO:0016021; GO:0016020; GO:0030054	plasma membrane; bicellular tight junction; integral component of membrane; membrane; cell junction	GO:0005198	structural molecule activity		chr1	45776856	45777515	RefSeq; ENSEMBL; NONCODE	Rattus norvegicus claudin 20 (Cldn20), mRNA.; claudin 20 [gene_biotype:protein_coding transcript_biotype:protein_coding]; Non-coding transcript identified by NONCODE	ENSRNOT00000030132	Pfam	1	main
157	17611631	AT rich interactive domain 1B (Swi1 like)	Arid1b	AJ440711	Rn.22598; Rn.228637	-0.0576573	down	0.59937	8.6596	8.71726	8.69694	8.8782	8.57662	8.56901	8.74401	8.66578	282546	XM_008758744///XM_008758745///XM_008774330	Q8CHN9; F1LNP1	XM_008758744; XM_008758745; XM_008774330; ENSRNOT00000022939; ENSRNOT00000084454; AJ440711	brain| connective tissue| ovary| adult; adrenal gland| brain| dorsal root ganglion| ovary| pancreas| thymus| adult	GO:0006338; GO:0006355; GO:0008150	chromatin remodeling; regulation of transcription, DNA-templated; biological_process	GO:0005654; GO:0005737; GO:0016514; GO:0071565; GO:0090544; GO:0005575; GO:0005634	nucleoplasm; cytoplasm; SWI/SNF complex; nBAF complex; BAF-type complex; cellular_component; nucleus	GO:0003677; GO:0003700; GO:0003674; GO:0005515	DNA binding; transcription factor activity, sequence-specific DNA binding; molecular_function; protein binding		chr1	47239545	47548532	RefSeq; ENSEMBL; GenBank	PREDICTED: Rattus norvegicus AT rich interactive domain 1B (Swi1 like) (Arid1b), transcript variant X2, partial mRNA.; PREDICTED: Rattus norvegicus AT rich interactive domain 1B (Swi1 like) (Arid1b), transcript variant X3, partial mRNA.; PREDICTED: Rattus norvegicus AT rich interactive domain 1B (Swi1 like) (Arid1b), transcript variant X1, mRNA.; AT rich interactive domain 1B (Swi1 like) [gene_bi…	ENSRNOT00000022939; ENSRNOT00000084454	Pfam	1	main
158	17611650	zinc finger, DHHC-type containing 14	Zdhhc14	AY886530	Rn.18327	-0.319808	down	0.0798453	8.30505	8.62486	8.88162	8.56836	8.4246	8.31232	8.34196	8.26089	499014	NM_001039343///XM_006227884///XM_006227885///XM_006227886///XR_349967	Q2TGJ5	NM_001039343; XM_006227884; XM_006227885; XM_006227886; XR_349967; ENSRNOT00000043521; AY886530	adrenal gland| brain| eye| heart| liver| nerve| placenta| adult	GO:0006612; GO:0018230; GO:0018345	protein targeting to membrane; peptidyl-L-cysteine S-palmitoylation; protein palmitoylation	GO:0005783; GO:0005794; GO:0016021; GO:0016020	endoplasmic reticulum; Golgi apparatus; integral component of membrane; membrane	GO:0008270; GO:0016409; GO:0019706; GO:0016740; GO:0016746; GO:0046872	zinc ion binding; palmitoyltransferase activity; protein-cysteine S-palmitoyltransferase activity; transferase activity; transferase activity, transferring acyl groups; metal ion binding		chrUn	0	227160	RefSeq; ENSEMBL; GenBank	Rattus norvegicus zinc finger, DHHC-type containing 14 (Zdhhc14), mRNA.; PREDICTED: Rattus norvegicus zinc finger, DHHC-type containing 14 (Zdhhc14), transcript variant X1, mRNA.; PREDICTED: Rattus norvegicus zinc finger, DHHC-type containing 14 (Zdhhc14), transcript variant X2, mRNA.; PREDICTED: Rattus norvegicus zinc finger, DHHC-type containing 14 (Zdhhc14), transcript variant X3, mRNA.; PREDI…	ENSRNOT00000043521	Pfam	1	main
159	17611655	synaptojanin 2	Synj2	AY034050|AY034051|U90312	Rn.10868	-0.149238	down	0.478823	6.99627	7.14551	7.31889	7.20828	6.90935	6.71793	7.05323	7.21764	84018	NM_001113371///NM_001113372///NM_032071	O55207; F1M0S5; F1LPP1; F1M2D6	NM_001113371; NM_001113372; NM_032071; ENSRNOT00000066798; ENSRNOT00000067661; ENSRNOT00000068476; AY034050; AY034051; U90312	brain| colon| lung| muscle| pancreas| pituitary gland| prostate| testis| juvenile| adult	GO:0006470; GO:0007420; GO:0046855; GO:0046856; GO:0048312	protein dephosphorylation; brain development; inositol phosphate dephosphorylation; phosphatidylinositol dephosphorylation; intracellular distribution of mitochondria	GO:0005737; GO:0005881; GO:0031315; GO:0032587; GO:0043679; GO:0048471; GO:0005739; GO:0005886; GO:0016020	cytoplasm; cytoplasmic microtubule; extrinsic component of mitochondrial outer membrane; ruffle membrane; axon terminus; perinuclear region of cytoplasm; mitochondrion; plasma membrane; membrane	GO:0000166; GO:0003676; GO:0003723; GO:0004439; GO:0004445; GO:0005515; GO:0017124; GO:0030165; GO:0042578; GO:0052744; GO:0016787	nucleotide binding; nucleic acid binding; RNA binding; phosphatidylinositol-4,5-bisphosphate 5-phosphatase activity; inositol-polyphosphate 5-phosphatase activity; protein binding; SH3 domain binding; PDZ domain binding; phosphoric ester hydrolase activity; phosphatidylinositol monophosphate phosphatase activity; hydrolase activity		chr1	48177197	48241903	RefSeq; ENSEMBL; GenBank; NONCODE	Rattus norvegicus synaptojanin 2 (Synj2), transcript variant 1, mRNA.; Rattus norvegicus synaptojanin 2 (Synj2), transcript variant 2, mRNA.; Rattus norvegicus synaptojanin 2 (Synj2), transcript variant 3, mRNA.; synaptojanin 2 [gene_biotype:protein_coding transcript_biotype:protein_coding]; Rattus norvegicus synaptojanin 2B1 mRNA, complete cds, alternatively spliced.; Rattus norvegicus synaptoja…	ENSRNOT00000066798; ENSRNOT00000067661; ENSRNOT00000068476	Pfam	1	main
160	17611686	general transcription factor IIH, polypeptide 5	Gtf2h5	BC058501|FQ212207	Rn.25310	0.0828339	up	0.521545	7.32134	7.23851	7.17436	7.1063	7.43487	7.42561	7.20941	7.329	502227	NM_001126088///XM_006227894	D3ZEI7	NM_001126088; XM_006227894; ENSRNOT00000024211; BC058501; FQ212207	adrenal gland| brain| colon| connective tissue| dorsal root ganglion| eye| heart| kidney| liver| lung| muscle| ovary| pancreas| pituitary gland| placenta| prostate| small intestine| spleen| juvenile| adult	GO:0006289; GO:0006294; GO:0006355; GO:0006362; GO:0006364; GO:0071480; GO:0008150	nucleotide-excision repair; nucleotide-excision repair, preincision complex assembly; regulation of transcription, DNA-templated; transcription elongation from RNA polymerase I promoter; rRNA processing; cellular response to gamma radiation; biological_process	GO:0000439; GO:0005730; GO:0005575	core TFIIH complex; nucleolus; cellular_component	GO:0000182; GO:0003674	rDNA binding; molecular_function		chr1	48280968	48287542	RefSeq; ENSEMBL; GenBank; NONCODE	Rattus norvegicus general transcription factor IIH, polypeptide 5 (Gtf2h5), mRNA.; PREDICTED: Rattus norvegicus general transcription factor IIH, polypeptide 5 (Gtf2h5), transcript variant X1, mRNA.; general transcription factor IIH, polypeptide 5 [gene_biotype:protein_coding transcript_biotype:protein_coding]; Rattus norvegicus cDNA clone IMAGE:6886947, partial cds.; Rattus norvegicus TL0AAA65YK…	ENSRNOT00000024211	Pfam	1	main
161	17611692	tubby like protein 4	Tulp4		Rn.198109	0.00410067	up	0.963862	10.3373	10.3332	10.363	10.3919	10.2449	10.4217	10.3966	10.1937	499016	NM_001109137///XM_006227887///XM_008758736///XM_008758737///XR_349970	D3ZFM2	NM_001109137; XM_006227887; XM_008758736; XM_008758737; XR_349970; ENSRNOT00000024412	brain| colon| dorsal root ganglion| heart| pineal gland| pituitary gland| prostate| fetus	GO:0016567; GO:0035556; GO:0061512	protein ubiquitination; intracellular signal transduction; protein localization to cilium	GO:0005737; GO:0005929	cytoplasm; cilium	GO:0035091	phosphatidylinositol binding		chr1	48334690	48430485	RefSeq; ENSEMBL; NONCODE	Rattus norvegicus tubby like protein 4 (Tulp4), mRNA.; PREDICTED: Rattus norvegicus tubby like protein 4 (Tulp4), transcript variant X2, mRNA.; PREDICTED: Rattus norvegicus tubby like protein 4 (Tulp4), transcript variant X1, mRNA.; PREDICTED: Rattus norvegicus tubby like protein 4 (Tulp4), transcript variant X3, mRNA.; PREDICTED: Rattus norvegicus tubby like protein 4 (Tulp4), transcript variant…	ENSRNOT00000024412	Pfam	1	main
162	17611709					-0.232432	down	0.468202	5.52308	5.75551	6.22746	5.58375	5.45532	5.22104	5.55901	5.78919													chr1	48344499	48344615	ENSEMBL; NONCODE	5S ribosomal RNA [gene_biotype:rRNA transcript_biotype:rRNA]; Non-coding transcript identified by NONCODE			1	main
163	17611711	transmembrane protein 181	Tmem181	BC168231|FQ211485|FQ228553	Rn.136597	0.087883	up	0.199743	8.45185	8.36397	8.42313	8.3654	8.30338	8.51294	8.48011	8.36251	502228	NM_001130939	B4F7D5	NM_001130939; ENSRNOT00000068457; BC168231; FQ211485; FQ228553	brain| connective tissue| dorsal root ganglion| kidney| ovary| pancreas| placenta| prostate| spleen| testis| thymus| juvenile| adult	GO:0009405	pathogenesis	GO:0016021; GO:0016020	integral component of membrane; membrane	GO:0015643	toxic substance binding		chrUn	0	60427	RefSeq; ENSEMBL; GenBank; NONCODE	Rattus norvegicus transmembrane protein 181 (Tmem181), mRNA.; transmembrane protein 181 [gene_biotype:protein_coding transcript_biotype:protein_coding]; Rattus norvegicus similar to OTTHUMP00000040081, mRNA (cDNA clone MGC:188304 IMAGE:7387910), complete cds.; Rattus norvegicus TL0AAA92YB11 mRNA sequence.; Rattus norvegicus TL0ADA7YA20 mRNA sequence.; cdna:genscan chromosome:Rnor_6.0:1:47139740:4…			1	main
164	17611731	synaptotagmin-like 3	Sytl3	BC166706	Rn.136598	-0.0520678	down	0.602778	5.5414	5.59347	5.56229	5.66823	5.54989	5.50094	5.41987	5.70339	499017	NM_001127560///XM_006227888///XM_006227891	B2RYA4; E9PU77	NM_001127560; XM_006227888; XM_006227891; ENSRNOT00000024967; BC166706	brain| connective tissue| prostate| adult	GO:0006886; GO:0006887; GO:0016079; GO:0017158; GO:0048791; GO:0006906	intracellular protein transport; exocytosis; synaptic vesicle exocytosis; regulation of calcium ion-dependent exocytosis; calcium ion-dependent exocytosis of neurotransmitter; vesicle fusion	GO:0005886; GO:0016020; GO:0019897; GO:0070382	plasma membrane; membrane; extrinsic component of plasma membrane; exocytic vesicle	GO:0005509; GO:0005543; GO:0005544; GO:0017137; GO:0019905; GO:0030276; GO:0042043; GO:0005515	calcium ion binding; phospholipid binding; calcium-dependent phospholipid binding; Rab GTPase binding; syntaxin binding; clathrin binding; neurexin family protein binding; protein binding		chr1	48534303	48590471	RefSeq; ENSEMBL; GenBank; NONCODE	Rattus norvegicus synaptotagmin-like 3 (Sytl3), mRNA.; PREDICTED: Rattus norvegicus synaptotagmin-like 3 (Sytl3), transcript variant X1, mRNA.; PREDICTED: Rattus norvegicus synaptotagmin-like 3 (Sytl3), transcript variant X2, mRNA.; synaptotagmin-like 3 [gene_biotype:protein_coding transcript_biotype:protein_coding]; Rattus norvegicus synaptotagmin-like 3, mRNA (cDNA clone MGC:188395 IMAGE:559923…	ENSRNOT00000024967	Pfam	1	main
165	17611750	fibronectin type III domain containing 1	Fndc1	DQ256268	Rn.20633	-0.0923055	down	0.429045	5.604	5.69631	5.60372	5.62412	5.86109	5.5327	5.73348	5.54583	308099	NM_001038615///XM_006227871///XM_008758732///XM_008758733	Q2Q0I9; A0A0G2K4G5	NM_001038615; XM_006227871; XM_008758732; XM_008758733; ENSRNOT00000034842; ENSRNOT00000089458; DQ256268	adipose tissue| connective tissue| eye| heart| kidney| prostate| adult	GO:0001934; GO:0010666; GO:0051223; GO:0071456	positive regulation of protein phosphorylation; positive regulation of cardiac muscle cell apoptotic process; regulation of protein transport; cellular response to hypoxia	GO:0005576; GO:0005654; GO:0005737; GO:0005886; GO:0005911; GO:0031966	extracellular region; nucleoplasm; cytoplasm; plasma membrane; cell-cell junction; mitochondrial membrane				chr1	48905802	48987223	RefSeq; ENSEMBL; GenBank; NONCODE	Rattus norvegicus fibronectin type III domain containing 1 (Fndc1), mRNA.; PREDICTED: Rattus norvegicus fibronectin type III domain containing 1 (Fndc1), transcript variant X1, mRNA.; PREDICTED: Rattus norvegicus fibronectin type III domain containing 1 (Fndc1), transcript variant X2, mRNA.; PREDICTED: Rattus norvegicus fibronectin type III domain containing 1 (Fndc1), transcript variant X3, mRNA…	ENSRNOT00000034842; ENSRNOT00000089458	Pfam	1	main
166	17611773	Wilms tumor 1 associated protein	Wtap	FQ212824|FQ228682	Rn.161764	0.0326583	up	0.422778	8.17784	8.14519	8.08641	8.17926	8.16988	8.17049	8.14454	8.2185	499020	NM_001113542///NM_001113543///NM_001113544///XM_006227892///XM_006227893	D3ZPY0; A0A0G2K2U2	NM_001113542; NM_001113543; NM_001113544; XM_006227892; XM_006227893; ENSRNOT00000025936; ENSRNOT00000079312; FQ212824; FQ228682	adrenal gland| brain| connective tissue| dorsal root ganglion| embryonic tissue| eye| heart| kidney| lung| ovary| pancreas| pineal gland| placenta| prostate| small intestine| spleen| thymus|tailbud embryo| metamorphosing embryo| fetus| juvenile| adult	GO:0000381; GO:0080009; GO:0048024	regulation of alternative mRNA splicing, via spliceosome; mRNA methylation; regulation of mRNA splicing, via spliceosome	GO:0005634; GO:0005654; GO:0016607; GO:0031965; GO:0036396	nucleus; nucleoplasm; nuclear speck; nuclear membrane; MIS complex	GO:0005515	protein binding		chr1	51781700	51806725	RefSeq; ENSEMBL; GenBank; NONCODE	Rattus norvegicus Wilms tumor 1 associated protein (Wtap), transcript variant 1, mRNA.; Rattus norvegicus Wilms tumor 1 associated protein (Wtap), transcript variant 2, mRNA.; Rattus norvegicus Wilms tumor 1 associated protein (Wtap), transcript variant 3, mRNA.; PREDICTED: Rattus norvegicus Wilms tumor 1 associated protein (Wtap), transcript variant X1, mRNA.; PREDICTED: Rattus norvegicus Wilms …			1	main
167	17611785	acetyl-CoA acetyltransferase 2	Acat2	BC083872	Rn.203063	-0.0665282	down	0.620374	7.56759	7.63412	7.65463	7.48746	7.76028	7.41362	7.74211	7.54705	308100	NM_001006995	Q5XI22; Q7TP61; F1LS48; A0A0G2JUB4	NM_001006995; ENSRNOT00000033408; ENSRNOT00000077707; BC083872	adrenal gland| brain| connective tissue| dorsal root ganglion| embryonic tissue| heart| kidney| liver| lung| ovary| pancreas| prostate| testis| vibrissa|tailbud embryo| metamorphosing embryo| fetus| juvenile| adult	GO:0001889; GO:0007420; GO:0031670; GO:0045797; GO:0046952; GO:0071398; GO:0008152	liver development; brain development; cellular response to nutrient; positive regulation of intestinal cholesterol absorption; ketone body catabolic process; cellular response to fatty acid; metabolic process	GO:0005634; GO:0005730; GO:0005737; GO:0005739; GO:0005829; GO:0070062	nucleus; nucleolus; cytoplasm; mitochondrion; cytosol; extracellular exosome	GO:0003985; GO:0016747; GO:0003824; GO:0016740; GO:0016746	acetyl-CoA C-acetyltransferase activity; transferase activity, transferring acyl groups other than amino-acyl groups; catalytic activity; transferase activity; transferase activity, transferring acyl groups		chrUn	0	35905	RefSeq; ENSEMBL; GenBank	Rattus norvegicus acetyl-CoA acetyltransferase 2 (Acat2), mRNA.; acetyl-CoA acetyltransferase 2 [gene_biotype:protein_coding transcript_biotype:protein_coding]; Rattus norvegicus acetyl-Coenzyme A acetyltransferase 2, mRNA (cDNA clone MGC:95138 IMAGE:7128564), complete cds.; cdna:genscan chromosome:Rnor_6.0:1:47964628:48025579:1 transcript_biotype:protein_coding	ENSRNOT00000033408; ENSRNOT00000077707	Pfam	1	main
168	17611806	acetyl-CoA acetyltransferase 2-like 1	Acat2l1			0.115132	up	0.679551	4.05626	3.94112	4.31473	3.54459	3.96405	4.3172	3.96263	3.88894	365096	XM_003748697///XM_003753176	D3ZKB6; A0A096MJY8			GO:0008152	metabolic process			GO:0016747; GO:0003824	transferase activity, transferring acyl groups other than amino-acyl groups; catalytic activity		chrUn	0	85614	RefSeq; ENSEMBL; Havana transcript	PREDICTED: Rattus norvegicus similar to Ab2-076 (RGD1562948), mRNA.; similar to Ab2-076 [gene_biotype:protein_coding transcript_biotype:protein_coding]; cdna:genscan chromosome:Rnor_6.0:1:47964628:48025579:1 transcript_biotype:protein_coding; novel protein similar to acetyl-Coenzyme A acetyltransferase 3 (Acat3)[gene_biotype:protein_coding transcript_biotype:protein_coding]	ENSRNOT00000018934; ENSRNOT00000076951; OTTRNOT00000001477	Pfam	1	main
169	17611835	mitochondrial ribosomal protein L18	Mrpl18	BC167033	Rn.4178	0.152127	up	0.428832	6.15597	6.00384	5.95017	5.88554	6.17581	6.02564	5.98917	6.4531	292244	NM_001106205	B2RZ57	NM_001106205; ENSRNOT00000020064; BC167033; OTTRNOT00000001473	adipose tissue| connective tissue| dorsal root ganglion| eye| liver| lung| muscle| pancreas| placenta| spleen| fetus| adult	GO:0006412; GO:0035928	translation; rRNA import into mitochondrion	GO:0005615; GO:0005739; GO:0005840; GO:0005622	extracellular space; mitochondrion; ribosome; intracellular	GO:0003735; GO:0008097	structural constituent of ribosome; 5S rRNA binding		chr1	51713671	51718629	RefSeq; ENSEMBL; GenBank; Havana transcript; NONCODE	Rattus norvegicus mitochondrial ribosomal protein L18 (Mrpl18), mRNA.; mitochondrial ribosomal protein L18 [gene_biotype:protein_coding transcript_biotype:protein_coding]; Rattus norvegicus mitochondrial ribosomal protein L18, mRNA (cDNA clone MGC:189275 IMAGE:8372474), complete cds.; mitochondrial ribosomal protein L18[gene_biotype:protein_coding transcript_biotype:protein_coding]; cdna:genscan …	ENSRNOT00000020064; OTTRNOT00000001473	Pfam	1	main
170	17611842	poly(A)-specific ribonuclease (PARN)-like domain containing 1	Pnldc1	BC099137	Rn.136599	-0.0526951	down	0.477345	5.57249	5.62519	5.65492	5.56759	5.65306	5.46175	5.58431	5.67142	361478	NM_001025724///XM_006227880///XM_008758734///XM_008758735	Q4KLL1; A0A096UWG8; A0A096MJ55; A0A096MK26	NM_001025724; XM_006227880; XM_008758734; XM_008758735; ENSRNOT00000060412; ENSRNOT00000075858; ENSRNOT00000076225; ENSRNOT00000076338; ENSRNOT00000076545; BC099137; OTTRNOT00000001468; OTTRNOT00000001469; OTTRNOT00000001470; OTTRNOT00000001471; OTTRNOT00000001472	brain| liver| testis| juvenile| adult			GO:0005634	nucleus	GO:0003676	nucleic acid binding		chr1	51693997	51712434	RefSeq; ENSEMBL; GenBank; Havana transcript; NONCODE	Rattus norvegicus poly(A)-specific ribonuclease (PARN)-like domain containing 1 (Pnldc1), mRNA.; PREDICTED: Rattus norvegicus poly(A)-specific ribonuclease (PARN)-like domain containing 1 (Pnldc1), transcript variant X2, mRNA.; PREDICTED: Rattus norvegicus poly(A)-specific ribonuclease (PARN)-like domain containing 1 (Pnldc1), transcript variant X1, mRNA.; PREDICTED: Rattus norvegicus poly(A)-spe…	ENSRNOT00000060412; ENSRNOT00000075858; ENSRNOT00000076225; ENSRNOT00000076338; OTTRNOT00000001468; OTTRNOT00000001469; OTTRNOT00000001470; OTTRNOT00000001472	Pfam	1	main
171	17611864	MAS1 proto-oncogene, G protein-coupled receptor	Mas1	BC078884	Rn.21943	0.114993	up	0.142512	5.40908	5.29409	5.25442	5.25073	5.37712	5.45834	5.31407	5.45483	25153	NM_012757///XM_006227859///XM_006227860///XM_006227867///XM_006227868///XM_008758726///XM_008758727///XM_008758728///XM_008758729///XM_008758730	P12526; W8W3M4	NM_012757; XM_006227859; XM_006227860; XM_006227867; XM_006227868; XM_008758726; XM_008758727; XM_008758728; XM_008758729; XM_008758730; ENSRNOT00000020100; BC078884	heart| testis	GO:0001933; GO:0007186; GO:0007250; GO:0007283; GO:0008284; GO:0008584; GO:0014823; GO:0021766; GO:0034698; GO:0038166; GO:0042493; GO:0043434; GO:0045740; GO:0050727; GO:0060732; GO:0070528; GO:0071375; GO:0007165	negative regulation of protein phosphorylation; G-protein coupled receptor signaling pathway; activation of NF-kappaB-inducing kinase activity; spermatogenesis; positive regulation of cell proliferation; male gonad development; response to activity; hippocampus development; response to gonadotropin; angiotensin-activated signaling pathway; response to drug; response to peptide hormone; positive r…	GO:0005622; GO:0005886; GO:0005887; GO:0009986; GO:0016020; GO:0016021	intracellular; plasma membrane; integral component of plasma membrane; cell surface; membrane; integral component of membrane	GO:0001595; GO:0004930; GO:0017046; GO:0042277; GO:0004871	angiotensin receptor activity; G-protein coupled receptor activity; peptide hormone binding; peptide binding; signal transducer activity	NM_012757 // GenMAPP // GPCRDB_Class_A_Rhodopsin-like///XM_006227859 // GenMAPP // GPCRDB_Class_A_Rhodopsin-like///XM_006227860 // GenMAPP // GPCRDB_Class_A_Rhodopsin-like///XM_006227867 // GenMAPP // GPCRDB_Class_A_Rhodopsin-like///XM_006227868 // GenMAPP // GPCRDB_Class_A_Rhodopsin-like///XM_008758726 // GenMAPP // GPCRDB_Class_A_Rhodopsin-like///XM_008758727 // GenMAPP // GPCRDB_Class_A_Rhodop…	chr1	51644719	51675364	RefSeq; ENSEMBL; GenBank; NONCODE	Rattus norvegicus MAS1 proto-oncogene, G protein-coupled receptor (Mas1), mRNA.; PREDICTED: Rattus norvegicus MAS1 proto-oncogene, G protein-coupled receptor (Mas1), transcript variant X3, mRNA.; PREDICTED: Rattus norvegicus MAS1 proto-oncogene, G protein-coupled receptor (Mas1), transcript variant X1, mRNA.; PREDICTED: Rattus norvegicus MAS1 proto-oncogene, G protein-coupled receptor (Mas1), tra…	ENSRNOT00000020100	Pfam	1	main
172	17611871	insulin-like growth factor 2 receptor	Igf2r	U59809	Rn.270	-0.0709451	down	0.223574	7.80005	7.871	7.94253	7.86325	7.8072	7.78409	7.75825	7.85781	25151	NM_012756	Q63002; G3V824	NM_012756; ENSRNOT00000021840; U59809	adipose tissue| brain| colon| connective tissue| embryonic tissue| eye| heart| kidney| liver| lung| ovary| pancreas| placenta| prostate| spleen| vibrissa|tailbud embryo| metamorphosing embryo| fetus| juvenile| adult	GO:0001889; GO:0007186; GO:0007283; GO:0009791; GO:0015031; GO:0031100; GO:0032526; GO:0042981; GO:0043065; GO:0048009; GO:0006810	liver development; G-protein coupled receptor signaling pathway; spermatogenesis; post-embryonic development; protein transport; organ regeneration; response to retinoic acid; regulation of apoptotic process; positive regulation of apoptotic process; insulin-like growth factor receptor signaling pathway; transport	GO:0005615; GO:0005634; GO:0005641; GO:0005768; GO:0005769; GO:0005770; GO:0005802; GO:0005886; GO:0005925; GO:0009986; GO:0016020; GO:0016021; GO:0030118; GO:0030139; GO:0030140; GO:0048471; GO:0070062; GO:0005737	extracellular space; nucleus; nuclear envelope lumen; endosome; early endosome; late endosome; trans-Golgi network; plasma membrane; focal adhesion; cell surface; membrane; integral component of membrane; clathrin coat; endocytic vesicle; trans-Golgi network transport vesicle; perinuclear region of cytoplasm; extracellular exosome; cytoplasm	GO:0001948; GO:0001965; GO:0001972; GO:0004930; GO:0005010; GO:0005215; GO:0005520; GO:0005537; GO:0019899; GO:0031995; GO:0042802; GO:0051219; GO:0005515	glycoprotein binding; G-protein alpha-subunit binding; retinoic acid binding; G-protein coupled receptor activity; insulin-like growth factor-activated receptor activity; transporter activity; insulin-like growth factor binding; mannose binding; enzyme binding; insulin-like growth factor II binding; identical protein binding; phosphoprotein binding; protein binding		chr1	51488766	51577140	RefSeq; ENSEMBL; GenBank; NONCODE	Rattus norvegicus insulin-like growth factor 2 receptor (Igf2r), mRNA.; insulin-like growth factor 2 receptor [gene_biotype:protein_coding transcript_biotype:protein_coding]; Rattus norvegicus mannose 6-phosphate/insulin-like growth factor II receptor (M6P/IGF2r) mRNA, complete cds.; cdna:genscan chromosome:Rnor_6.0:1:48176190:48263220:1 transcript_biotype:protein_coding; Non-coding transcript id…	ENSRNOT00000021840	Pfam	1	main
173	17611922	solute carrier family 22 (organic cation transporter), member 1	Slc22a1	BC078883|U76379	Rn.11186	0.0739469	up	0.695465	6.04237	5.96843	6.10375	5.79817	6.00336	6.3439	5.90402	5.8792	24904	NM_012697	Q63089	NM_012697; ENSRNOT00000022068; ENSRNOT00000022254; BC078883; U76379	heart| kidney| liver| ovary| pancreas| pituitary gland| small intestine| adult	GO:0006812; GO:0006836; GO:0006855; GO:0010248; GO:0015695; GO:0015697; GO:0015844; GO:0015872; GO:0015874; GO:0048241; GO:0051260; GO:0072488; GO:1901374; GO:0006810; GO:0006811; GO:0055085; GO:0098655	cation transport; neurotransmitter transport; drug transmembrane transport; establishment or maintenance of transmembrane electrochemical gradient; organic cation transport; quaternary ammonium group transport; monoamine transport; dopamine transport; norepinephrine transport; epinephrine transport; protein homooligomerization; ammonium transmembrane transport; acetate ester transport; transport;…	GO:0005887; GO:0016323; GO:0005886; GO:0016020; GO:0016021	integral component of plasma membrane; basolateral plasma membrane; plasma membrane; membrane; integral component of membrane	GO:0005277; GO:0005329; GO:0005333; GO:0008504; GO:0008513; GO:0015101; GO:0015651; GO:0042802; GO:0042803; GO:0005215; GO:0022857; GO:0005515	acetylcholine transmembrane transporter activity; dopamine transmembrane transporter activity; norepinephrine transmembrane transporter activity; monoamine transmembrane transporter activity; secondary active organic cation transmembrane transporter activity; organic cation transmembrane transporter activity; quaternary ammonium group transmembrane transporter activity; identical protein binding;…		chr1	51452275	51479609	RefSeq; ENSEMBL; GenBank; NONCODE	Rattus norvegicus solute carrier family 22 (organic cation transporter), member 1 (Slc22a1), mRNA.; solute carrier family 22 (organic cation transporter), member 1 [gene_biotype:protein_coding transcript_biotype:protein_coding]; Rattus norvegicus solute carrier family 22 (organic cation transporter), member 1, mRNA (cDNA clone MGC:93570 IMAGE:7130305), complete cds.; Rattus norvegicus organic cat…	ENSRNOT00000022068; ENSRNOT00000022254	Pfam	1	main
174	17611937					0.175452	up	0.591158	5.00645	4.831	4.95445	4.26566	5.2729	5.08118	5.01829	4.9199													chr1	51366259	51367372					1	main
175	17611941	solute carrier family 22 (organic cation transporter), member 3	Slc22a3	AF055286	Rn.24231	-0.0538467	down	0.678922	3.85274	3.90659	3.68068	4.00279	4.03629	3.8567	3.77841	3.92311	29504	NM_019230	O88446	NM_019230; ENSRNOT00000037369; AF055286	adipose tissue| brain| spleen| adult	GO:0015695; GO:0015697; GO:0015844; GO:0015872; GO:0032098; GO:0051608; GO:0051615; GO:0072488; GO:0098779; GO:1901998; GO:0006810; GO:0006811; GO:0055085; GO:0098655	organic cation transport; quaternary ammonium group transport; monoamine transport; dopamine transport; regulation of appetite; histamine transport; histamine uptake; ammonium transmembrane transport; mitophagy in response to mitochondrial depolarization; toxin transport; transport; ion transport; transmembrane transport; cation transmembrane transport	GO:0005887; GO:0016020; GO:0016021	integral component of plasma membrane; membrane; integral component of membrane	GO:0005329; GO:0005515; GO:0015101; GO:0015651; GO:0019534; GO:0005215; GO:0022857	dopamine transmembrane transporter activity; protein binding; organic cation transmembrane transporter activity; quaternary ammonium group transmembrane transporter activity; toxin transporter activity; transporter activity; transmembrane transporter activity		chrUn	0	91738	RefSeq; ENSEMBL; GenBank; NONCODE	Rattus norvegicus solute carrier family 22 (organic cation transporter), member 3 (Slc22a3), mRNA.; solute carrier family 22 (organic cation transporter), member 3 [gene_biotype:protein_coding transcript_biotype:protein_coding]; Rattus norvegicus potential-sensitive polyspecific organic cation transporter OCT3 (OCT3) mRNA, complete cds.; cdna:genscan chromosome:Rnor_6.0:1:48433470:48519917:1 tran…	ENSRNOT00000037369	Pfam	1	main
176	17611955	mitogen activated protein kinase kinase kinase 4	Map3k4		Rn.66100	0.171321	up	0.0346015	7.7816	7.61028	7.68191	7.57358	7.57533	7.79161	7.84705	7.70613	308106	NM_001107456///XM_006227872///XM_006227873///XM_006227874	D3ZGU6; A0A0G2K3R1	NM_001107456; XM_006227872; XM_006227873; XM_006227874; ENSRNOT00000064018; ENSRNOT00000084317	brain| dorsal root ganglion| pineal gland| prostate| metamorphosing embryo| adult	GO:0000165; GO:0000186; GO:0000187; GO:0001890; GO:0010225; GO:0010468; GO:0019100; GO:0032212; GO:0035556; GO:0043507; GO:0051973; GO:0060718; GO:1900745; GO:1904355; GO:0006468; GO:0008150; GO:0016310	MAPK cascade; activation of MAPKK activity; activation of MAPK activity; placenta development; response to UV-C; regulation of gene expression; male germ-line sex determination; positive regulation of telomere maintenance via telomerase; intracellular signal transduction; positive regulation of JUN kinase activity; positive regulation of telomerase activity; chorionic trophoblast cell differentia…	GO:0005622; GO:0005737; GO:0005575	intracellular; cytoplasm; cellular_component	GO:0004672; GO:0004708; GO:0004709; GO:0005524; GO:0000166; GO:0003674; GO:0016301; GO:0005515	protein kinase activity; MAP kinase kinase activity; MAP kinase kinase kinase activity; ATP binding; nucleotide binding; molecular_function; kinase activity; protein binding		chr1	51043919	51129818	RefSeq; ENSEMBL; NONCODE	Rattus norvegicus mitogen activated protein kinase kinase kinase 4 (Map3k4), mRNA.; PREDICTED: Rattus norvegicus mitogen activated protein kinase kinase kinase 4 (Map3k4), transcript variant X1, mRNA.; PREDICTED: Rattus norvegicus mitogen activated protein kinase kinase kinase 4 (Map3k4), transcript variant X2, mRNA.; PREDICTED: Rattus norvegicus mitogen activated protein kinase kinase kinase 4 (…	ENSRNOT00000064018; ENSRNOT00000084317	Pfam	1	main							o
177	17611983	Park2 co-regulated	Pacrg	BC127534	Rn.14085	-0.0767805	down	0.70951	7.45611	7.53289	7.83077	7.31035	7.45754	7.67592	7.29867	7.39373	499021	NM_001077677	A0JPP9	NM_001077677; BC127534	lung| muscle| testis| fetus| adult	GO:0007286; GO:0060548	spermatid development; negative regulation of cell death	GO:0005634; GO:0005739; GO:0005829; GO:0005929; GO:0031982; GO:0043005; GO:0044297; GO:0097225	nucleus; mitochondrion; cytosol; cilium; vesicle; neuron projection; cell body; sperm midpiece	GO:0001664; GO:0003779; GO:0030544; GO:0031072; GO:0031625; GO:0043014; GO:0048487; GO:0051087; GO:0051879	G-protein coupled receptor binding; actin binding; Hsp70 protein binding; heat shock protein binding; ubiquitin protein ligase binding; alpha-tubulin binding; beta-tubulin binding; chaperone binding; Hsp90 protein binding		chrUn	0	461721	RefSeq; GenBank; ENSEMBL; NONCODE	Rattus norvegicus Park2 co-regulated (Pacrg), mRNA.; Rattus norvegicus Park2 co-regulated, mRNA (cDNA clone MGC:156800 IMAGE:7133203), complete cds.; cdna:genscan chromosome:Rnor_6.0:1:50309378:50368387:1 transcript_biotype:protein_coding; cdna:genscan chromosome:Rnor_6.0:1:50797232:50797438:1 transcript_biotype:protein_coding; cdna:genscan chromosome:Rnor_6.0:1:50469762:50504478:1 transcript_bio…			1	main						o	o
178	17611990	quaking; QKI, KH domain containing, RNA binding	Qk; Qki	BC158800|AB054997|AB054997	Rn.228876	-0.0628167	down	0.272941	11.0391	11.1019	11.1528	11.0423	11.1106	11.053	10.9683	11.0961	499022; 100910212	NM_001115021///XM_008758777///XM_008758778///XM_008758779///XM_008758779///XM_008758780///XM_008758780///XM_008758781///XM_008758781	Q91XU1; B0BNF5; D4A2X0; F1LMH5; A0A0G2JXZ5; A0A0G2JUS0	NM_001115021; BC158800; AB054997	brain| connective tissue| dorsal root ganglion| embryonic tissue| eye| lung| pituitary gland| spleen| metamorphosing embryo| juvenile| adult	GO:0001570; GO:0006397; GO:0006417; GO:0007286; GO:0007420; GO:0008366; GO:0008380; GO:0010628; GO:0010667; GO:0010976; GO:0042552; GO:0042692; GO:0042759; GO:0048255; GO:0048714; GO:0051028; GO:0061158; GO:0006810; GO:0007275; GO:0030154	vasculogenesis; mRNA processing; regulation of translation; spermatid development; brain development; axon ensheathment; RNA splicing; positive regulation of gene expression; negative regulation of cardiac muscle cell apoptotic process; positive regulation of neuron projection development; myelination; muscle cell differentiation; long-chain fatty acid biosynthetic process; mRNA stabilization; po…	GO:0005634; GO:0005737	nucleus; cytoplasm	GO:0003723; GO:0003729; GO:0017124; GO:0044822; GO:0003674; GO:0003676; GO:0005515	RNA binding; mRNA binding; SH3 domain binding; poly(A) RNA binding; molecular_function; nucleic acid binding; protein binding		chr1	52104780	52328929	RefSeq; GenBank; ENSEMBL; NONCODE	Rattus norvegicus quaking (Qk), mRNA.; PREDICTED: Rattus norvegicus protein quaking-like (LOC100910212), transcript variant X1, mRNA.; PREDICTED: Rattus norvegicus protein quaking-like (LOC100910212), transcript variant X2, mRNA.; PREDICTED: Rattus norvegicus protein quaking-like (LOC100910212), transcript variant X3, mRNA.; PREDICTED: Rattus norvegicus protein quaking-like (LOC100910212), transc…	ENSRNOT00000023290; ENSRNOT00000035402; ENSRNOT00000086441; ENSRNOT00000089149	Pfam	1	main						o	o
179	17612002	poly(A) binding protein, cytoplasmic 6	Pabpc6	BC168959	Rn.108830	-0.15581	down	0.272912	4.23791	4.39372	4.48784	4.3311	4.36221	4.05045	4.22251	4.44076	292295	NM_001106208	B5DF80	NM_001106208; ENSRNOT00000023319; BC168959	testis| juvenile			GO:0005737; GO:0070062	cytoplasm; extracellular exosome	GO:0000166; GO:0003723; GO:0008143; GO:0003676	nucleotide binding; RNA binding; poly(A) binding; nucleic acid binding		chr1	52894282	52897431	RefSeq; ENSEMBL; GenBank; NONCODE	Rattus norvegicus poly(A) binding protein, cytoplasmic 6 (Pabpc6), mRNA.; poly(A) binding protein, cytoplasmic 6 [gene_biotype:protein_coding transcript_biotype:protein_coding]; Rattus norvegicus poly(A) binding protein, cytoplasmic 3, mRNA (cDNA clone MGC:189273 IMAGE:7135469), complete cds.; cdna:genscan chromosome:Rnor_6.0:1:51619934:51621865:1 transcript_biotype:protein_coding; Non-coding tra…	ENSRNOT00000023319	Pfam	1	main
180	17612006	ribonuclease T2	Rnaset2	BC168957	Rn.18019	-0.0616788	down	0.625678	8.46484	8.52652	8.42104	8.66578	8.49274	8.5248	8.28496	8.58477	292306	NM_001106210	B5DF79; D3ZCH6; A0A0G2K9L0	NM_001106210; ENSRNOT00000017601; ENSRNOT00000084628	adrenal gland| brain| connective tissue| dorsal root ganglion| eye| liver| lung| ovary| placenta| prostate| spleen| juvenile| adult	GO:0006401; GO:0090501; GO:0090502	RNA catabolic process; RNA phosphodiester bond hydrolysis; RNA phosphodiester bond hydrolysis, endonucleolytic	GO:0005576; GO:0005615; GO:0005764; GO:0005788; GO:0070062	extracellular region; extracellular space; lysosome; endoplasmic reticulum lumen; extracellular exosome	GO:0003723; GO:0004521; GO:0004540; GO:0033897	RNA binding; endoribonuclease activity; ribonuclease activity; ribonuclease T2 activity		chr1	54425133	54442302	RefSeq; ENSEMBL; GenBank; NONCODE	Rattus norvegicus ribonuclease T2 (Rnaset2), mRNA.; ribonuclease T2 [gene_biotype:protein_coding transcript_biotype:protein_coding]; Rattus norvegicus ribonuclease T2, mRNA (cDNA clone MGC:189268 IMAGE:9098746), complete cds.; Non-coding transcript identified by NONCODE; cdna:genscan chromosome:Rnor_6.0:1:53174975:53214528:1 transcript_biotype:protein_coding	ENSRNOT00000017601; ENSRNOT00000084628	Pfam	1	main
181	17612016					-0.0571396	down	0.564806	6.32015	6.37729	6.39902	6.36315	6.3697	6.14281	6.44015	6.37749													chr1	54469940	54551345	ENSEMBL; NONCODE	cdna:genscan chromosome:Rnor_6.0:1:53286022:53304161:1 transcript_biotype:protein_coding; Non-coding transcript identified by NONCODE; ensembl:novel chromosome:Rnor_6.0:1:53220397:53284319:1 gene:ENSRNOG00000057484 gene_biotype:protein_coding transcript_biotype:protein_coding			1	main
182	17612028	ribosomal protein S6 kinase polypeptide 2	Rps6ka2		Rn.2356	-0.0843578	down	0.412157	7.59303	7.67739	7.81817	7.54669	7.66731	7.51748	7.57846	7.68315	117269	NM_057128///XM_006227917	Q9Z1I2; F1M7N7	NM_057128; XM_006227917; ENSRNOT00000017809	brain| colon| dorsal root ganglion| eye| heart| kidney| ovary| prostate| fetus| juvenile| adult	GO:0001556; GO:0002035; GO:0006417; GO:0006468; GO:0007507; GO:0008285; GO:0010628; GO:0010659; GO:0018105; GO:0035556; GO:0043065; GO:0045786; GO:0045835; GO:0060047; GO:0070613; GO:0071322; GO:0016310	oocyte maturation; brain renin-angiotensin system; regulation of translation; protein phosphorylation; heart development; negative regulation of cell proliferation; positive regulation of gene expression; cardiac muscle cell apoptotic process; peptidyl-serine phosphorylation; intracellular signal transduction; positive regulation of apoptotic process; negative regulation of cell cycle; negative r…	GO:0005634; GO:0005654; GO:0005737; GO:0005819; GO:0005840; GO:0031965	nucleus; nucleoplasm; cytoplasm; spindle; ribosome; nuclear membrane	GO:0000287; GO:0004672; GO:0004674; GO:0004711; GO:0004712; GO:0005524; GO:0000166; GO:0016301; GO:0016740; GO:0005515	magnesium ion binding; protein kinase activity; protein serine/threonine kinase activity; ribosomal protein S6 kinase activity; protein serine/threonine/tyrosine kinase activity; ATP binding; nucleotide binding; kinase activity; transferase activity; protein binding		chr1	54609625	54747731	RefSeq; ENSEMBL; NONCODE	Rattus norvegicus ribosomal protein S6 kinase polypeptide 2 (Rps6ka2), mRNA.; PREDICTED: Rattus norvegicus ribosomal protein S6 kinase polypeptide 2 (Rps6ka2), transcript variant X1, mRNA.; ribosomal protein S6 kinase polypeptide 2 [gene_biotype:protein_coding transcript_biotype:protein_coding]; cdna:genscan chromosome:Rnor_6.0:1:53414622:53513382:1 transcript_biotype:protein_coding; Non-coding t…	ENSRNOT00000017809	Pfam	1	main	o					o	o
183	17612052	t-complex protein 10b	Tcp10b	BC166440	Rn.138402	0.188177	up	0.185153	5.40037	5.21219	5.17019	5.1036	5.36278	5.5705	5.27354	5.35706	308169	NM_001107461///XM_006227927///XM_006227928///XM_006227930///XM_008758757///XM_008758758///XM_008758759	D3ZUW1; A0A0G2JYT7	NM_001107461; XM_006227927; XM_006227928; XM_006227930; XM_008758757; XM_008758758; XM_008758759; ENSRNOT00000018015; ENSRNOT00000077340; BC166440	testis| juvenile| adult	GO:0000122	negative regulation of transcription from RNA polymerase II promoter	GO:0005634	nucleus	GO:0001106; GO:0042802; GO:0043621; GO:0070491	RNA polymerase II transcription corepressor activity; identical protein binding; protein self-association; repressing transcription factor binding		chrUn	0	23342	RefSeq; ENSEMBL; GenBank; NONCODE	Rattus norvegicus t-complex protein 10b (Tcp10b), mRNA.; PREDICTED: Rattus norvegicus t-complex protein 10b (Tcp10b), transcript variant X2, mRNA.; PREDICTED: Rattus norvegicus t-complex protein 10b (Tcp10b), transcript variant X3, mRNA.; PREDICTED: Rattus norvegicus t-complex protein 10b (Tcp10b), transcript variant X5, mRNA.; PREDICTED: Rattus norvegicus t-complex protein 10b (Tcp10b), transcri…	ENSRNOT00000018015; ENSRNOT00000077340	Pfam	1	main
184	17612074	sperm motility kinase 2A	Smok2a		Rn.145528	-0.145512	down	0.404494	3.31723	3.46274	3.63022	3.1562	3.60178	3.36292	3.32638	3.26238	292316	XM_574319///XM_008758795///XM_008758798	M0RD88	XM_574319; ENSRNOT00000072895	testis	GO:0006468; GO:0035556	protein phosphorylation; intracellular signal transduction	GO:0005634; GO:0005737	nucleus; cytoplasm	GO:0004672; GO:0005524; GO:0000166; GO:0004674	protein kinase activity; ATP binding; nucleotide binding; protein serine/threonine kinase activity		chrUn	0	2024	RefSeq; ENSEMBL; NONCODE	PREDICTED: Rattus norvegicus sperm motility kinase 2A (Smok2a), transcript variant X2, mRNA.; Protein LOC100362047 [gene_biotype:protein_coding transcript_biotype:protein_coding]; cdna:genscan chromosome:Rnor_6.0:1:54825114:54952635:-1 transcript_biotype:protein_coding; PREDICTED: Rattus norvegicus similar to putative protein kinase (RGD1560718), mRNA.; PREDICTED: Rattus norvegicus sperm motility…	ENSRNOT00000072895	Pfam	1	main
185	17612078	sperm motility kinase 2A	Smok2a		Rn.145528	0.200237	up	0.210236	5.16839	4.96815	4.87915	5.13642	4.88888	5.37761	5.05929	5.06826	292316	XM_574319///NM_001191619///XM_008758795///XM_008758866///XM_008758798	M0RD88	XM_574319; ENSRNOT00000072895; NM_001191619	testis	GO:0006468; GO:0035556	protein phosphorylation; intracellular signal transduction	GO:0005634; GO:0005737	nucleus; cytoplasm	GO:0004672; GO:0005524; GO:0000166; GO:0004674	protein kinase activity; ATP binding; nucleotide binding; protein serine/threonine kinase activity		chr1	56065259	56066707	RefSeq; ENSEMBL; NONCODE	PREDICTED: Rattus norvegicus sperm motility kinase 2A (Smok2a), transcript variant X2, mRNA.; Protein LOC100362047 [gene_biotype:protein_coding transcript_biotype:protein_coding]; Rattus norvegicus sperm motility kinase 2A (Smok2a), mRNA.; ensembl:novel chromosome:Rnor_6.0:1:54126216:54127569:-1 gene:ENSRNOG00000059913 gene_biotype:lincRNA transcript_biotype:lincRNA; cdna:genscan chromosome:Rnor_…	ENSRNOT00000072895	Pfam	3	main
186	17612080					0.0256978	up	0.796189	4.82805	4.80235	4.72959	4.87954	4.79793	4.91126	4.66328	4.90961													chr1	55269563	55269667	ENSEMBL	U6 spliceosomal RNA [gene_biotype:snRNA transcript_biotype:snRNA]			3	main
187	17612082					-0.180942	down	0.367281	5.86392	6.04486	5.95596	6.37537	5.80325	5.79729	5.83281	5.96166		XM_574319											chr1	56065259	56066707	RefSeq; ENSEMBL	PREDICTED: Rattus norvegicus sperm motility kinase 2A (Smok2a), transcript variant X2, mRNA.; Protein LOC100362047 [gene_biotype:protein_coding transcript_biotype:protein_coding]; cdna:genscan chromosome:Rnor_6.0:1:54825114:54952635:-1 transcript_biotype:protein_coding			3	main
188	17612084	similar to putative protein kinase	RGD1560718			-0.205503	down	0.613067	3.07641	3.28192	2.9678	3.81333	3.06462	3.30589	3.37255	2.55081	499027	XM_008758795///XM_008758798	M0RDM0			GO:0006468; GO:0035556	protein phosphorylation; intracellular signal transduction	GO:0005737	cytoplasm	GO:0004674; GO:0005524; GO:0000166; GO:0004672	protein serine/threonine kinase activity; ATP binding; nucleotide binding; protein kinase activity		chr1	55274511	55275959	RefSeq; ENSEMBL; NONCODE	PREDICTED: Rattus norvegicus similar to putative protein kinase (RGD1560718), mRNA.; PREDICTED: Rattus norvegicus sperm motility kinase 2B-like (LOC103690981), mRNA.; Protein RGD1560718 [gene_biotype:protein_coding transcript_biotype:protein_coding]; cdna:genscan chromosome:Rnor_6.0:1:53977371:54042145:-1 transcript_biotype:protein_coding; Non-coding transcript identified by NONCODE	ENSRNOT00000075019	Pfam	3	main
189	17612086					-0.102519	down	0.198125	2.60211	2.70463	2.60326	2.73586	2.77475	2.53238	2.67626	2.59768													chr1	55179838	55179941	ENSEMBL; NONCODE	U6 spliceosomal RNA [gene_biotype:snRNA transcript_biotype:snRNA]; Non-coding transcript identified by NONCODE			3	main
190	17612088					0.495544	up	0.203187	7.99082	7.49528	7.21242	7.48886	7.78456	8.55156	7.67504	7.74587													chr1	55150493	55153270	ENSEMBL; NONCODE	cdna:genscan chromosome:Rnor_6.0:1:53912773:53913344:-1 transcript_biotype:protein_coding; Non-coding transcript identified by NONCODE			3	main
191	17612090	myeloid/lymphoid or mixed-lineage leukemia; translocated to, 4	Mllt4	U83230|U83231	Rn.58	0.127234	up	0.0763931	8.20076	8.07353	8.12997	8.07894	8.01168	8.28281	8.16605	8.15342	26955	NM_013217	O35889; F1LT10	NM_013217; U83230; U83231	adipose tissue| brain| colon| dorsal root ganglion| embryonic tissue| eye| heart| kidney| liver| lung| nerve| ovary| placenta| prostate| small intestine| spleen| metamorphosing embryo| fetus| juvenile| adult	GO:0007155; GO:0007165; GO:0021537; GO:0021987; GO:0034334; GO:0043547; GO:0048854; GO:0048872; GO:0060019; GO:0060563; GO:0070445; GO:0090557	cell adhesion; signal transduction; telencephalon development; cerebral cortex development; adherens junction maintenance; positive regulation of GTPase activity; brain morphogenesis; homeostasis of number of cells; radial glial cell differentiation; neuroepithelial cell differentiation; regulation of oligodendrocyte progenitor proliferation; establishment of endothelial intestinal barrier	GO:0005654; GO:0005737; GO:0005829; GO:0005886; GO:0005911; GO:0005912; GO:0005913; GO:0030054; GO:0045177	nucleoplasm; cytoplasm; cytosol; plasma membrane; cell-cell junction; adherens junction; cell-cell adherens junction; cell junction; apical part of cell	GO:0005515; GO:0017016; GO:0030274; GO:0050839	protein binding; Ras GTPase binding; LIM domain binding; cell adhesion molecule binding	NM_013217 // GenMAPP // Krebs-TCA_Cycle///U83230 // GenMAPP // Krebs-TCA_Cycle///U83231 // GenMAPP // Krebs-TCA_Cycle	chrUn	0	85487	RefSeq; GenBank; ENSEMBL; NONCODE	Rattus norvegicus myeloid/lymphoid or mixed-lineage leukemia; translocated to, 4 (Mllt4), mRNA.; Rattus norvegicus l-Afadin mRNA, complete cds.; Rattus norvegicus s-Afadin mRNA, complete cds.; myeloid/lymphoid or mixed-lineage leukemia (trithorax homolog, Drosophila); translocated to, 4 [gene_biotype:protein_coding transcript_biotype:protein_coding]; cdna:genscan chromosome:Rnor_6.0:1:53696493:53…	ENSRNOT00000032667	Pfam	1	main						o	o					o
192	17612129	uncharacterized LOC102556715	LOC102556715			0.0089428	up	0.965643	5.88405	5.87511	5.95324	5.92339	5.7487	5.55342	6.1909	5.90784	102556715	XM_006222922											chrUn	0	9708	RefSeq	PREDICTED: Rattus norvegicus uncharacterized LOC102556715 (LOC102556715), mRNA.			1	main
193	17612139					0.237744	up	0.303011	10.9754	10.7377	10.3804	11.0105	10.8222	10.8927	10.9081	11.1255													chr1	87960321	87960432					3	main
194	17612141					-0.220139	down	0.00101207	3.65581	3.87595	3.89944	3.82531	3.90309	3.6521	3.66372	3.65161													chr1	56683695	56693094					1	main
195	17612148					0.210853	up	0.361126	3.98539	3.77454	3.64523	3.74484	3.93355	4.19836	3.61394	4.14389		NM_001099463											chrUn	0	29296	ENSEMBL; RefSeq	cdna:genscan chromosome:Rnor_6.0:1:86732751:86776738:-1 transcript_biotype:protein_coding; cdna:genscan chromosome:Rnor_6.0:1:54534727:54646428:1 transcript_biotype:protein_coding; Rattus norvegicus vomeronasal 2 receptor, 7 (Vom2r7), mRNA.			1	main
196	17612155					-0.0752167	down	0.509791	2.0491	2.12432	2.15332	2.07772	2.14192	2.08913	2.2012	1.85698													chr1	176250400	176250503	ENSEMBL	U6 spliceosomal RNA [gene_biotype:snRNA transcript_biotype:snRNA]			1	main
197	17612157	vomeronasal 2 receptor, 8	Vom2r8		Rn.201688	0.229364	up	0.416255	2.8397	2.61033	2.91749	2.28543	2.62808	3.19017	2.67501	2.65391	685641	NM_001099464	D3ZYL3	NM_001099464; ENSRNOT00000042050	prostate	GO:0007186; GO:0007165	G-protein coupled receptor signaling pathway; signal transduction	GO:0005886; GO:0016021; GO:0016020	plasma membrane; integral component of membrane; membrane	GO:0004930; GO:0004871	G-protein coupled receptor activity; signal transducer activity		chr1	176189368	176229412	RefSeq; ENSEMBL; NONCODE	Rattus norvegicus vomeronasal 2 receptor, 8 (Vom2r8), mRNA.; vomeronasal 2 receptor, 38 [gene_biotype:protein_coding transcript_biotype:protein_coding]; cdna:genscan scaffold:Rnor_6.0:AABR07024031.1:16710:59371:-1 transcript_biotype:protein_coding; Non-coding transcript identified by NONCODE	ENSRNOT00000042050	Pfam	1	main
198	17612164	vomeronasal 2 receptor, 9	Vom2r9		Rn.217930	-0.234188	down	0.42546	3.42237	3.65656	3.53793	4.02212	3.40962	3.69434	3.06374	3.50902	685666	NM_001099465	D3ZJ30	NM_001099465; ENSRNOT00000029537		GO:0007186; GO:0007165	G-protein coupled receptor signaling pathway; signal transduction	GO:0005886; GO:0016021; GO:0016020	plasma membrane; integral component of membrane; membrane	GO:0004930; GO:0004871	G-protein coupled receptor activity; signal transducer activity		chrUn	0	13784	RefSeq; ENSEMBL; NONCODE	Rattus norvegicus vomeronasal 2 receptor, 9 (Vom2r9), mRNA.; vomeronasal 2 receptor, 9 [gene_biotype:protein_coding transcript_biotype:protein_coding]; Non-coding transcript identified by NONCODE	ENSRNOT00000029537	Pfam	1	main
199	17612171	uncharacterized LOC103690992	LOC103690992			-0.131753	down	0.336792	4.33716	4.46891	4.55623	4.5931	4.25741	4.22688	4.42023	4.36437	103690992	XR_589986											chrUn	0	12295	RefSeq	PREDICTED: Rattus norvegicus uncharacterized LOC103690992 (LOC103690992), ncRNA.			1	main
200	17612179	similar to putative protein kinase	RGD1561185			0.172811	up	0.301404	6.39007	6.21726	6.25049	6.34447	6.05682	6.59186	6.39727	6.18108	502251	XM_008758870///XM_001065293///XM_003748704///XM_008758801											chr1	56429031	56430581	RefSeq; ENSEMBL	PREDICTED: Rattus norvegicus similar to putative protein kinase (RGD1561185), transcript variant X2, mRNA.; PREDICTED: Rattus norvegicus similar to serine/threonine kinase (LOC685793), transcript variant X2, mRNA.; cdna:genscan chromosome:Rnor_6.0:1:86785230:86819379:1 transcript_biotype:protein_coding; cdna:genscan chromosome:Rnor_6.0:1:55662372:55719355:-1 transcript_biotype:protein_coding; PRE…			3	main
201	17612182	similar to putative protein kinase	RGD1561667; RGD1561185			0.324669	up	0.118668	5.99499	5.67032	5.56302	5.90701	5.54091	6.21746	5.92007	5.84742	292393; 502251	XM_003748704///XM_006227170///XM_008758801///XM_008758870///XM_008774345///XM_001065293///XM_003753182	F1M3Z2			GO:0006468; GO:0035556	protein phosphorylation; intracellular signal transduction	GO:0005634; GO:0005737	nucleus; cytoplasm	GO:0004672; GO:0005524; GO:0000166; GO:0004674	protein kinase activity; ATP binding; nucleotide binding; protein serine/threonine kinase activity		chr1	87991721	87993184	RefSeq; ENSEMBL	PREDICTED: Rattus norvegicus similar to putative protein kinase (RGD1561667), transcript variant X3, mRNA.; PREDICTED: Rattus norvegicus similar to putative protein kinase (RGD1561185), transcript variant X1, partial mRNA.; PREDICTED: Rattus norvegicus similar to putative protein kinase (RGD1561667), transcript variant X2, mRNA.; PREDICTED: Rattus norvegicus similar to putative protein kinase (RG…	ENSRNOT00000041610	Pfam	3	main
202	17612184					0.104829	up	0.583554	4.35264	4.24781	4.00697	4.52932	4.20715	4.42951	4.45233	4.17609													chrUn	0	20161					1	main
203	17612189					0.206038	up	0.223576	5.46667	5.26063	5.44398	5.18308	5.15484	5.53485	5.25199	5.61318													chr1	56511381	56951318					3	main
204	17612193					-0.007889	down	0.953825	4.85938	4.86727	4.94621	4.67708	4.97853	4.75633	5.02849	4.79333													chr1	56429032	56430581					3	main
205	17612195					0.0724263	up	0.689622	4.75408	4.68165	4.73159	4.64507	4.6683	5.08711	4.57848	4.59665													chr1	56511379	56952304					3	main
206	17612199					0.221128	up	0.100263	7.37693	7.1558	7.05512	7.328	7.08429	7.4712	7.27295	7.38665													chr1	56429032	56477693					3	main
207	17612204					0.414791	up	0.104599	5.49492	5.08013	5.06966	5.03163	5.1391	5.1608	5.83875	5.4852													chr1	56374580	56430581					3	main
208	17612207					-0.300162	down	0.0829686	5.48435	5.78451	5.71585	5.63841	5.99927	5.42615	5.62514	5.40174													chr1	56862923	56956878					1	main
209	17612223					-0.0431234	down	0.760642	5.06123	5.10435	5.21413	4.89379	5.20514	4.9014	5.1391	5.14319													chrUn	0	24638					1	main
210	17612228					-0.0327627	down	0.729687	5.2259	5.25866	5.12492	5.32225	5.3288	5.33882	5.19067	5.1482													chr1	56864139	56947663					1	main
211	17612232					0.177116	up	0.576327	3.97173	3.79461	4.31433	3.66342	3.40608	4.03304	3.75926	4.12288													chrUn	0	986616					1	main
212	17612243					0.0798594	up	0.712997	3.88784	3.80798	3.86185	3.98919	3.57289	3.66778	4.19985	3.79588													chr1	87991742	87993184					3	main
213	17612245					-0.272688	down	0.288059	5.50048	5.77317	6.00296	5.57901	5.73754	5.13204	5.65067	5.71873													chr1	87991721	87993019					3	main
214	17612247					0.0793872	up	0.769772	2.99783	2.91844	3.00442	2.94035	2.81055	2.54777	3.04663	3.39909													chr1	56411995	56583409					3	main
215	17612254					0.060018	up	0.776414	2.34376	2.28375	2.32672	2.34505	2.17947	2.24836	2.71085	2.07208													chr1	56946756	56947584					3	main
216	17612256					0.217356	up	0.235764	4.20482	3.98746	3.85054	4.12945	3.98239	4.469	4.10627	4.03919													chr1	56429032	56530373					3	main
217	17612259	SPARC related modular calcium binding 2	Smoc2	BC168953	Rn.6092	0.231369	up	0.327438	5.5909	5.35953	5.48678	5.22863	5.36317	5.94324	5.55425	5.2752	292401	NM_001106215///XM_006227958	B5DF75; A0A0G2K0K9	NM_001106215; XM_006227958; ENSRNOT00000019317; ENSRNOT00000079718; BC168953	connective tissue| kidney| lung| muscle| ovary| prostate| spleen| metamorphosing embryo| fetus| juvenile| adult	GO:0007165; GO:0010811; GO:0030198	signal transduction; positive regulation of cell-substrate adhesion; extracellular matrix organization	GO:0005578; GO:0005604; GO:0005614	proteinaceous extracellular matrix; basement membrane; interstitial matrix	GO:0005509; GO:0005539; GO:0008201	calcium ion binding; glycosaminoglycan binding; heparin binding		chr1	57434174	57565337	RefSeq; ENSEMBL; GenBank; NONCODE	Rattus norvegicus SPARC related modular calcium binding 2 (Smoc2), mRNA.; PREDICTED: Rattus norvegicus SPARC related modular calcium binding 2 (Smoc2), transcript variant X1, mRNA.; SPARC related modular calcium binding 2 [gene_biotype:protein_coding transcript_biotype:protein_coding]; Rattus norvegicus SPARC related modular calcium binding 2, mRNA (cDNA clone MGC:189261 IMAGE:7109706), complete …	ENSRNOT00000019317; ENSRNOT00000079718	Pfam	1	main
218	17612272	hypothetical protein LOC100125364	LOC100125364		Rn.234071	-0.0802237	down	0.164329	7.46849	7.54872	7.54097	7.51466	7.59052	7.40184	7.45865	7.54499	100125364	NM_001103356///XM_006227969///XM_006227970///XM_008758746	Q6AY64	NM_001103356; XM_006227969; XM_006227970; XM_008758746; ENSRNOT00000020889	brain| dorsal root ganglion| kidney| liver| lung| pituitary gland| spleen| juvenile| adult	GO:0006915	apoptotic process	GO:0070062; GO:0005576	extracellular exosome; extracellular region				chr1	58133058	58135259	RefSeq; ENSEMBL; NONCODE	Rattus norvegicus hypothetical protein LOC100125364 (LOC100125364), mRNA.; PREDICTED: Rattus norvegicus hypothetical protein LOC100125364 (LOC100125364), transcript variant X2, mRNA.; PREDICTED: Rattus norvegicus hypothetical protein LOC100125364 (LOC100125364), transcript variant X3, mRNA.; PREDICTED: Rattus norvegicus hypothetical protein LOC100125364 (LOC100125364), transcript variant X1, mRNA…			1	main	o
219	17612277	ER membrane-associated RNA degradation	Ermard	BC079331|BC105837|FQ209736|FQ214922	Rn.7393	-0.0541553	down	0.811479	7.71162	7.76577	8.13368	7.58426	7.57937	7.56958	7.64508	7.92019	361485	XM_002728660///XM_006222982///XM_006227972///XM_006227974///XM_006227975///XM_006227976///XM_008758815///XM_008758816///XM_008758817	Q3B8R1	XM_002728660; XM_006222982; XM_006227972; XM_006227974; XM_006227975; XM_006227976; XM_008758815; XM_008758816; XM_008758817; ENSRNOT00000059845; BC079331; BC105837; FQ209736; FQ214922	adipose tissue| brain| eye| heart| liver| lung| pituitary gland| placenta| prostate| spleen| testis| thymus|tailbud embryo| juvenile| adult	GO:0007275	multicellular organismal development	GO:0005789; GO:0016021; GO:0005783; GO:0016020	endoplasmic reticulum membrane; integral component of membrane; endoplasmic reticulum; membrane				chr1	58165846	58185153	RefSeq; ENSEMBL; GenBank; NONCODE	PREDICTED: Rattus norvegicus ER membrane-associated RNA degradation (Ermard), transcript variant X2, mRNA.; PREDICTED: Rattus norvegicus ER membrane-associated RNA degradation (Ermard), transcript variant X1, mRNA.; PREDICTED: Rattus norvegicus ER membrane-associated RNA degradation (Ermard), transcript variant X3, mRNA.; PREDICTED: Rattus norvegicus ER membrane-associated RNA degradation (Ermard…	ENSRNOT00000059845	Pfam	1	main
220	17612300	family with sequence similarity 120B	Fam120b	FQ210918	Rn.2666	0.137753	up	0.335987	8.45823	8.32047	8.15725	8.32198	8.4822	8.56098	8.5225	8.2912	308218	NM_001107466///XM_006231141///XM_006231142///XM_008758761	D4AE88; A0A0G2K8J8	NM_001107466; XM_006231141; XM_006231142; XM_008758761; ENSRNOT00000082790; ENSRNOT00000084017; FQ210918	adipose tissue| adrenal gland| brain| colon| connective tissue| eye| heart| lung| ovary| prostate| fetus| juvenile| adult			GO:0005634	nucleus				chr1	242134746	242181177	RefSeq; ENSEMBL; GenBank; NONCODE	Rattus norvegicus family with sequence similarity 120B (Fam120b), mRNA.; PREDICTED: Rattus norvegicus family with sequence similarity 120B (Fam120b), transcript variant X1, mRNA.; PREDICTED: Rattus norvegicus family with sequence similarity 120B (Fam120b), transcript variant X3, mRNA.; PREDICTED: Rattus norvegicus family with sequence similarity 120B (Fam120b), transcript variant X2, mRNA.; famil…			1	main
221	17612316	TATA box binding protein	Tbp	BC081939	Rn.22712	-0.0551602	down	0.35788	8.46896	8.52412	8.44374	8.5321	8.59653	8.41437	8.47752	8.51501	117526	NM_001004198///XM_006227980///XM_008758747///XM_008758748	Q66HB1	NM_001004198; XM_006227980; XM_008758747; XM_008758748; ENSRNOT00000002038; BC081939	brain| connective tissue| embryonic tissue| eye| heart| kidney| lung| ovary| placenta| spleen| testis| thymus|tailbud embryo| fetus| juvenile| adult	GO:0006352; GO:0006366; GO:0006383; GO:0007283; GO:0045893	DNA-templated transcription, initiation; transcription from RNA polymerase II promoter; transcription from RNA polymerase III promoter; spermatogenesis; positive regulation of transcription, DNA-templated	GO:0001939; GO:0001940; GO:0005634; GO:0005654; GO:0005669; GO:0005672; GO:0005719; GO:0005737; GO:0045120	female pronucleus; male pronucleus; nucleus; nucleoplasm; transcription factor TFIID complex; transcription factor TFIIA complex; nuclear euchromatin; cytoplasm; pronucleus	GO:0000978; GO:0000979; GO:0001103; GO:0003677; GO:0003700; GO:0005515; GO:0008134; GO:0019899; GO:0044212; GO:0070491	RNA polymerase II core promoter proximal region sequence-specific DNA binding; RNA polymerase II core promoter sequence-specific DNA binding; RNA polymerase II repressing transcription factor binding; DNA binding; transcription factor activity, sequence-specific DNA binding; protein binding; transcription factor binding; enzyme binding; transcription regulatory region DNA binding; repressing tran…		chr1	58420201	58438562	RefSeq; ENSEMBL; GenBank; NONCODE	Rattus norvegicus TATA box binding protein (Tbp), mRNA.; PREDICTED: Rattus norvegicus TATA box binding protein (Tbp), transcript variant X3, mRNA.; PREDICTED: Rattus norvegicus TATA box binding protein (Tbp), transcript variant X1, mRNA.; PREDICTED: Rattus norvegicus TATA box binding protein (Tbp), transcript variant X2, mRNA.; TATA box binding protein [gene_biotype:protein_coding transcript_biot…	ENSRNOT00000002038	Pfam	1	main
222	17612327	uncharacterized LOC102551889	LOC102551889			0.103164	up	0.625628	8.72306	8.6199	8.26416	8.8751	8.72044	8.84971	8.61805	8.70143	102551889	XR_590005											chr1	58489961	58520281	RefSeq	PREDICTED: Rattus norvegicus uncharacterized LOC102551889 (LOC102551889), transcript variant X5, ncRNA.			1	main
223	17612331	chromodomain helicase DNA binding protein 1	Chd1		Rn.198122	-0.0280683	down	0.741891	7.66411	7.69218	7.73352	7.64955	7.69346	7.51703	7.7689	7.7064	308215	NM_001107465	D4AAG9; A0A0G2K5T4	NM_001107465	brain| colon| connective tissue| embryonic tissue| kidney| liver| lung| ovary| pancreas| pineal gland| placenta| prostate| testis| metamorphosing embryo| fetus| juvenile| adult	GO:0006338; GO:0043923; GO:0008150	chromatin remodeling; positive regulation by host of viral transcription; biological_process	GO:0005634; GO:0005737; GO:0005575	nucleus; cytoplasm; cellular_component	GO:0005524; GO:0035064; GO:0005515; GO:0003674; GO:0003677	ATP binding; methylated histone binding; protein binding; molecular_function; DNA binding		chr1	58619378	58655351	RefSeq; ENSEMBL	Rattus norvegicus chromodomain helicase DNA binding protein 1 (Chd1), mRNA.; chromodomain helicase DNA binding protein 1 [gene_biotype:protein_coding transcript_biotype:protein_coding]; cdna:genscan chromosome:Rnor_6.0:1:57692983:57755485:1 transcript_biotype:protein_coding	ENSRNOT00000019358; ENSRNOT00000083968	Pfam	1	main
224	17612350					0.377444	up	0.110143	4.20438	3.82694	3.79341	3.95757	3.72984	3.90898	4.5031	4.20106													chr1	59263413	59263552	ENSEMBL	Small nucleolar RNA SNORA67 [gene_biotype:snoRNA transcript_biotype:snoRNA]			1	main
225	17612352					-0.167176	down	0.491807	2.9564	3.12358	3.03085	3.28957	3.05033	3.34841	2.65675	2.86406													chr1	60044904	60045902					1	main
226	17612355	RIO kinase 2	Riok2	BC088297|FQ232861	Rn.137079	-0.119924	down	0.489303	7.21593	7.33585	7.47125	7.1939	7.34241	7.18035	7.00052	7.46692	308201	NM_001009687	Q5I0I1	NM_001009687; ENSRNOT00000017165; BC088297; FQ232861	adipose tissue| brain| connective tissue| embryonic tissue| eye| liver| ovary| pancreas| prostate| small intestine| spleen| testis| thymus| juvenile| adult	GO:0006468; GO:0016310	protein phosphorylation; phosphorylation			GO:0004674; GO:0005524; GO:0004672; GO:0016301	protein serine/threonine kinase activity; ATP binding; protein kinase activity; kinase activity		chr1	60057339	60073788	RefSeq; ENSEMBL; GenBank; NONCODE	Rattus norvegicus RIO kinase 2 (Riok2), mRNA.; RIO kinase 2 [gene_biotype:protein_coding transcript_biotype:protein_coding]; Rattus norvegicus RIO kinase 2 (yeast), mRNA (cDNA clone MGC:109496 IMAGE:7322759), complete cds.; Rattus norvegicus TL0AEA64YC20 mRNA sequence.; cdna:genscan chromosome:Rnor_6.0:1:59130019:59146334:1 transcript_biotype:protein_coding; Non-coding transcript identified by NO…	ENSRNOT00000017165	Pfam	1	main
227	17612367	limb and CNS expressed 1	Lix1		Rn.162409	0.149387	up	0.171581	8.24974	8.10035	8.04257	8.13881	8.11967	8.41644	8.13881	8.19396	292381	NM_001106214	D3ZAG6	NM_001106214; ENSRNOT00000017442	brain| eye| pineal gland| adult	GO:0006914; GO:0097352	autophagy; autophagosome maturation	GO:0005737	cytoplasm				chr1	60083352	60139895	RefSeq; ENSEMBL; NONCODE	Rattus norvegicus limb and CNS expressed 1 (Lix1), mRNA.; Lix1 homolog (chicken) [gene_biotype:protein_coding transcript_biotype:protein_coding]; cdna:genscan chromosome:Rnor_6.0:1:59156454:59223263:1 transcript_biotype:protein_coding; Non-coding transcript identified by NONCODE	ENSRNOT00000017442	Pfam	1	main
228	17612377					-0.0635172	down	0.729979	2.88542	2.94894	2.79348	2.85287	3.20046	2.80008	3.11384	2.74233													chr1	60381290	60381460					1	main
229	17612379	microRNA 99b	Mir99b			0.245483	up	0.415425	8.23597	7.99049	8.01634	7.97468	7.98044	8.77609	7.95317	7.97865	100314189	NR_031857											chr1	60623874	60623943	RefSeq; ENSEMBL; miRBase Micro RNA Database; NONCODE	Rattus norvegicus microRNA 99b (Mir99b), microRNA.; microRNA 99b [gene_biotype:miRNA transcript_biotype:miRNA]; MI0000884 Rattus norvegicus miR-99b stem-loop; Non-coding transcript identified by NONCODE			3	main
230	17612381	microRNA let-7e	Mirlet7e			-0.0032425	down	0.986076	4.66576	4.66901	4.66475	4.79182	4.55045	4.92113	4.70545	4.3707	100313991	NR_031805											chr1	60624039	60624131	RefSeq; miRBase Micro RNA Database; NONCODE	Rattus norvegicus microRNA let-7e (Mirlet7e), microRNA.; MI0000832 Rattus norvegicus let-7e stem-loop; Non-coding transcript identified by NONCODE			1	main
231	17612383	microRNA 125a	Mir125a			-0.0448083	down	0.608648	5.90501	5.94982	5.93871	5.89871	6.01204	5.94714	5.76171	6.00618	100314236	NR_031868											chr1	60624485	60624569	RefSeq; ENSEMBL; miRBase Micro RNA Database; NONCODE	Rattus norvegicus microRNA 125a (Mir125a), microRNA.; microRNA 125a [gene_biotype:miRNA transcript_biotype:miRNA]; MI0000895 Rattus norvegicus miR-125a stem-loop; Non-coding transcript identified by NONCODE			1	main
232	17612385	hypothetical protein LOC688452	LOC688452	FM212919	Rn.15197	-0.241265	down	0.211131	6.29927	6.54053	6.84608	6.32544	6.45008	6.22629	6.3035	6.36801	688452	NM_001135720	B6ETS2; B8ZXH4	NM_001135720; ENSRNOT00000014598; FM212919	brain| connective tissue| heart| lung| ovary| placenta| testis| juvenile| adult	GO:0007342	fusion of sperm to egg plasma membrane	GO:0016021; GO:0016020	integral component of membrane; membrane				chr1	60624656	60635421	RefSeq; ENSEMBL; GenBank; NONCODE	Rattus norvegicus hypothetical protein LOC688452 (LOC688452), mRNA.; hypothetical protein LOC688452 [gene_biotype:protein_coding transcript_biotype:protein_coding]; Rattus norvegicus mRNA for SPACA6 protein, strain BN.; cdna:genscan chromosome:Rnor_6.0:1:59701305:59718780:1 transcript_biotype:protein_coding; Non-coding transcript identified by NONCODE	ENSRNOT00000014598	Pfam	1	main
233	17612397	formyl peptide receptor 2; formyl peptide receptor 2-like	Fpr2; Fpr2l			0.0463406	up	0.617254	3.82681	3.78047	3.68369	3.81284	3.84487	3.71147	3.95345	3.81551	690158; 681706	XM_001073508///XM_003753185///XM_001058050	F1M670			GO:0007186; GO:0007200; GO:0007165	G-protein coupled receptor signaling pathway; phospholipase C-activating G-protein coupled receptor signaling pathway; signal transduction	GO:0016021; GO:0016020	integral component of membrane; membrane	GO:0004872; GO:0004930; GO:0004982; GO:0050786; GO:0004871	receptor activity; G-protein coupled receptor activity; N-formyl peptide receptor activity; RAGE receptor binding; signal transducer activity		chr1	60719564	60720619	RefSeq; ENSEMBL	PREDICTED: Rattus norvegicus formyl peptide receptor 2 (Fpr2), transcript variant X2, mRNA.; PREDICTED: Rattus norvegicus formyl peptide receptor 2 (Fpr2), transcript variant X1, mRNA.; PREDICTED: Rattus norvegicus formyl peptide receptor 2-like (Fpr2l), mRNA.; formyl peptide receptor 3 [gene_biotype:protein_coding transcript_biotype:protein_coding]; cdna:genscan chromosome:Rnor_6.0:1:59801178:59…	ENSRNOT00000064917	Pfam	1	main
234	17612399	formyl peptide receptor 3	Fpr3	FQ227508	Rn.144779	-0.105039	down	0.477932	3.8501	3.95514	4.19836	3.85421	3.81284	3.73888	3.89803	3.91338	292413	XM_001058175///XM_003748874	D4A8L8	FQ227508	lung| adult	GO:0007186; GO:0007165	G-protein coupled receptor signaling pathway; signal transduction	GO:0016021; GO:0016020	integral component of membrane; membrane	GO:0004930; GO:0004871; GO:0050786	G-protein coupled receptor activity; signal transducer activity; RAGE receptor binding		chr1	117322321	117323350	RefSeq; ENSEMBL; GenBank	PREDICTED: Rattus norvegicus formyl peptide receptor 3 (Fpr3), mRNA.; formyl peptide receptor 2 [gene_biotype:protein_coding transcript_biotype:protein_coding]; cdna:genscan chromosome:Rnor_6.0:1:116152667:116153722:-1 transcript_biotype:protein_coding; Rattus norvegicus TL0AEA13YB20 mRNA sequence.	ENSRNOT00000041605	Pfam	1	main
235	17612404	formyl peptide receptor, related sequence 4	Fpr-rs4			0.0541795	up	0.861639	3.70699	3.65281	3.52427	3.58101	3.85315	4.20604	3.6508	3.26412	690198	XM_002728692///XM_003753186	D4A942			GO:0007186; GO:0007165	G-protein coupled receptor signaling pathway; signal transduction	GO:0016021; GO:0016020	integral component of membrane; membrane	GO:0004872; GO:0004982; GO:0004871; GO:0004930	receptor activity; N-formyl peptide receptor activity; signal transducer activity; G-protein coupled receptor activity		chr1	87277566	87278537	RefSeq; ENSEMBL	PREDICTED: Rattus norvegicus formyl peptide receptor, related sequence 4 (Fpr-rs4), mRNA.; formyl peptide receptor, related sequence 4 [gene_biotype:protein_coding transcript_biotype:protein_coding]	ENSRNOT00000066769	Pfam	1	main
236	17612406	vomeronasal 2 receptor, 10	Vom2r10		Rn.217941	-0.0245784	down	0.878252	2.34001	2.36459	2.32891	2.40136	2.36349	2.43507	2.04768	2.53728	292414	NM_001099469	D4A741	NM_001099469; ENSRNOT00000014883		GO:0007186; GO:0007165	G-protein coupled receptor signaling pathway; signal transduction	GO:0005886; GO:0016021; GO:0016020	plasma membrane; integral component of membrane; membrane	GO:0004930; GO:0004871	G-protein coupled receptor activity; signal transducer activity		chrUn	0	50411	RefSeq; ENSEMBL; NONCODE	Rattus norvegicus vomeronasal 2 receptor, 10 (Vom2r10), mRNA.; vomeronasal 2 receptor, 10 [gene_biotype:protein_coding transcript_biotype:protein_coding]; Non-coding transcript identified by NONCODE; cdna:genscan chromosome:Rnor_6.0:1:85984102:86149145:1 transcript_biotype:protein_coding	ENSRNOT00000014883	Pfam	1	main
237	17612414	vomeronasal 1 receptor 2	Vom1r2	AY510349	Rn.129463	-0.121131	down	0.515144	2.28607	2.4072	2.57589	2.53412	2.1116	2.3119	2.13147	2.41484	494253	NM_001008903	Q5J3G1	NM_001008903; ENSRNOT00000052300; AY510349		GO:0007186	G-protein coupled receptor signaling pathway	GO:0016021; GO:0016020	integral component of membrane; membrane	GO:0016503	pheromone receptor activity		chr1	87567366	87568274	RefSeq; ENSEMBL; GenBank; NONCODE	Rattus norvegicus vomeronasal 1 receptor 2 (Vom1r2), mRNA.; vomeronasal 1 receptor 2 [gene_biotype:protein_coding transcript_biotype:protein_coding]; Rattus norvegicus vomeronasal V1r-type receptor V1re26 mRNA, complete cds.; Non-coding transcript identified by NONCODE	ENSRNOT00000052300	Pfam	1	main
238	17612416	vomeronasal 1 receptor 3	Vom1r3	AY510342	Rn.129462	0.267079	up	0.120109	2.48428	2.2172	2.39978	2.05134	2.20049	2.51776	2.31355	2.62153	494237	NM_001009517	Q5J3G8	NM_001009517; ENSRNOT00000045789; AY510342		GO:0007186	G-protein coupled receptor signaling pathway	GO:0016021; GO:0016020	integral component of membrane; membrane	GO:0016503	pheromone receptor activity		chr1	87633289	87634185	RefSeq; ENSEMBL; GenBank; NONCODE	Rattus norvegicus vomeronasal 1 receptor 3 (Vom1r3), mRNA.; Vomeronasal V1r-type receptor V1re25 [gene_biotype:protein_coding transcript_biotype:protein_coding]; Rattus norvegicus vomeronasal V1r-type receptor V1re25 mRNA, complete cds.; Non-coding transcript identified by NONCODE	ENSRNOT00000045789	Pfam	1	main
239	17612418	vomeronasal 1 receptor 4	Vom1r4	AY510338	Rn.129461	0.148475	up	0.273362	3.63457	3.48609	3.35124	3.62351	3.48353	3.5143	3.80289	3.58651	494236	NM_001009516	Q5J3H2	NM_001009516; ENSRNOT00000052208; AY510338		GO:0007186	G-protein coupled receptor signaling pathway	GO:0016021; GO:0016020	integral component of membrane; membrane	GO:0016503	pheromone receptor activity		chr1	87719103	87719999	RefSeq; ENSEMBL; GenBank; NONCODE	Rattus norvegicus vomeronasal 1 receptor 4 (Vom1r4), mRNA.; vomeronasal 1 receptor 4 [gene_biotype:protein_coding transcript_biotype:protein_coding]; Rattus norvegicus vomeronasal V1r-type receptor V1re24 mRNA, complete cds.; Non-coding transcript identified by NONCODE	ENSRNOT00000052208	Pfam	1	main
240	17612420	vomeronasal 1 receptor 6	Vom1r6	AY510290	Rn.129459	0.123617	up	0.404263	2.66658	2.54296	2.71204	2.48673	2.43013	2.82847	2.69014	2.48113	494231	NM_001009512	Q5J3M0	NM_001009512; ENSRNOT00000079924; AY510290		GO:0007186	G-protein coupled receptor signaling pathway	GO:0016021; GO:0016020	integral component of membrane; membrane	GO:0016503	pheromone receptor activity		chr1	60960461	60961357	RefSeq; ENSEMBL; GenBank; NONCODE	Rattus norvegicus vomeronasal 1 receptor 6 (Vom1r6), mRNA.; vomeronasal 1 receptor 6 [gene_biotype:protein_coding transcript_biotype:protein_coding]; Rattus norvegicus vomeronasal V1r-type receptor V1re2 mRNA, complete cds.; Non-coding transcript identified by NONCODE	ENSRNOT00000079924	Pfam	1	main
241	17612422	similar to TAF5-like RNA polymerase II, p300/CBP-associated factor (PCAF)-associated factor	LOC690283		Rn.225410	0.0491987	up	0.667509	5.73521	5.68601	5.66252	5.66765	5.72785	5.53307	5.88018	5.79236	690283	XM_008758820///XM_008774350	D3ZIZ2	XM_008758820; XM_008774350	brain| lung| placenta| metamorphosing embryo| juvenile	GO:0006355	regulation of transcription, DNA-templated	GO:0005634	nucleus				chr1	61020485	61021490	RefSeq; ENSEMBL; NONCODE	PREDICTED: Rattus norvegicus similar to TAF5-like RNA polymerase II, p300/CBP-associated factor (PCAF)-associated factor (LOC690283), mRNA.; Protein Taf5l [gene_biotype:protein_coding transcript_biotype:protein_coding]; cdna:genscan chromosome:Rnor_6.0:1:60106034:60107799:1 transcript_biotype:protein_coding; Non-coding transcript identified by NONCODE	ENSRNOT00000014930	Pfam	3	main
242	17612424	vomeronasal 1 receptor 8	Vom1r8	AY510276	Rn.129457	-0.331341	down	0.122332	3.36924	3.70058	3.65556	4.00629	3.43989	3.35679	3.44168	3.30924	494258	NM_001008905	Q5J3N4	NM_001008905; ENSRNOT00000080437; AY510276		GO:0007186	G-protein coupled receptor signaling pathway	GO:0016021; GO:0016020	integral component of membrane; membrane	GO:0016503	pheromone receptor activity		chr1	61032236	61033147	RefSeq; ENSEMBL; GenBank; NONCODE	Rattus norvegicus vomeronasal 1 receptor 8 (Vom1r8), mRNA.; vomeronasal 1 receptor 8 [gene_biotype:protein_coding transcript_biotype:protein_coding]; Rattus norvegicus vomeronasal V1r-type receptor V1re1 mRNA, complete cds.; Non-coding transcript identified by NONCODE	ENSRNOT00000080437	Pfam	1	main
243	17612426					-0.137008	down	0.233252	2.15982	2.29683	2.33355	2.32208	2.23484	1.99194	2.17628	2.31123													chr1	61053092	61056058	ENSEMBL	cdna:genscan chromosome:Rnor_6.0:1:60142446:60280634:1 transcript_biotype:protein_coding			1	main
244	17612434	vomeronasal 1 receptor 9; vomeronasal 1 receptor 9 [Source:RGD Symbol;Acc:2316475]	Vom1r9		Rn.222401; Rn.222400	0.223523	up	0.347222	3.69541	3.47188	3.33769	3.24253	3.83543	3.58101	3.89803	3.60718	100312665	NM_001167547	M0R4Z7	NM_001167547; ENSRNOT00000079558		GO:0007186	G-protein coupled receptor signaling pathway	GO:0016021; GO:0016020	integral component of membrane; membrane	GO:0016503	pheromone receptor activity		chr1	61240565	61241515	RefSeq; ENSEMBL	Rattus norvegicus vomeronasal 1 receptor 9 (Vom1r9), mRNA.; vomeronasal 1 receptor 9 [gene_biotype:protein_coding transcript_biotype:protein_coding]	ENSRNOT00000079558	Pfam	3	main
245	17612436	vomeronasal 1 receptor 13	Vom1r13		Rn.222400	0.428128	up	0.0981661	3.3331	2.90497	2.90803	2.84162	2.96527	3.67656	3.3252	2.99754	100312667	NM_001167548		NM_001167548									chrUn	0	77296	RefSeq	Rattus norvegicus vomeronasal 1 receptor 13 (Vom1r13), mRNA.			3	main
246	17612439	protein phosphatase 2, regulatory subunit A, alpha	Ppp2r1a	BC083859	Rn.4108	-0.084856	down	0.458766	10.9592	11.044	11.2108	10.9006	11.0207	11.0269	10.9907	10.8598	117281	NM_057140	Q5XI34; O35511	NM_057140; ENSRNOT00000015019; BC083859	adipose tissue| adrenal gland| brain| colon| connective tissue| dorsal root ganglion| embryonic tissue| eye| heart| kidney| liver| lung| nerve| pancreas| pineal gland| pituitary gland| placenta| prostate| spleen| testis| thymus|tailbud embryo| metamorphosing embryo| fetus| juvenile| adult	GO:0006461; GO:0007059; GO:0007143; GO:0034047; GO:0051232; GO:0051306; GO:0051754; GO:0070262; GO:1903538; GO:2001241	protein complex assembly; chromosome segregation; female meiotic division; regulation of protein phosphatase type 2A activity; meiotic spindle elongation; mitotic sister chromatid separation; meiotic sister chromatid cohesion, centromeric; peptidyl-serine dephosphorylation; regulation of meiotic cell cycle process involved in oocyte maturation; positive regulation of extrinsic apoptotic signaling…	GO:0000159; GO:0000775; GO:0005829; GO:0070062	protein phosphatase type 2A complex; chromosome, centromeric region; cytosol; extracellular exosome	GO:0003823; GO:0004722; GO:0008601; GO:0046982; GO:0005515	antigen binding; protein serine/threonine phosphatase activity; protein phosphatase type 2A regulator activity; protein heterodimerization activity; protein binding		chr1	61883998	61903241	RefSeq; ENSEMBL; GenBank; NONCODE	Rattus norvegicus protein phosphatase 2, regulatory subunit A, alpha (Ppp2r1a), mRNA.; protein phosphatase 2, regulatory subunit A, alpha [gene_biotype:protein_coding transcript_biotype:protein_coding]; Rattus norvegicus protein phosphatase 2 (formerly 2A), regulatory subunit A, alpha isoform, mRNA (cDNA clone MGC:95083 IMAGE:7126254), complete cds.; cdna:genscan chromosome:Rnor_6.0:1:60717387:60…	ENSRNOT00000015019	Pfam	1	main					o
247	17612455	vomeronasal 1 receptor, F4-like	LOC100365363			0.0495462	up	0.616014	5.68055	5.63101	5.73629	5.48625	5.67047	5.7345	5.73106	5.57611	100365363	XM_006222942///XM_006222943///XM_006222944///XM_006227996///XM_006227997///XM_006227998	A0A0G2K0R0			GO:0006355	regulation of transcription, DNA-templated	GO:0005654; GO:0005622	nucleoplasm; intracellular	GO:0003676; GO:0046872	nucleic acid binding; metal ion binding		chrUn	0	88493	RefSeq; ENSEMBL; NONCODE	PREDICTED: Rattus norvegicus vomeronasal 1 receptor, F4-like (LOC100365363), transcript variant X1, mRNA.; PREDICTED: Rattus norvegicus vomeronasal 1 receptor, F4-like (LOC100365363), transcript variant X2, mRNA.; PREDICTED: Rattus norvegicus vomeronasal 1 receptor, F4-like (LOC100365363), transcript variant X3, mRNA.; PREDICTED: Rattus norvegicus vomeronasal 1 receptor, F4-like (LOC100365363), t…			1	main
248	17612462			AY510366		0.307746	up	0.0585506	3.94678	3.63903	3.62464	3.60258	3.68987	3.79237	3.87796	4.17		NM_001009522///NM_001167572											chr1	62384298	62385203	RefSeq; GenBank; ENSEMBL; NONCODE	Rattus norvegicus vomeronasal 1 receptor 111 (Vom1r111), mRNA.; Rattus norvegicus vomeronasal 1 receptor 17 (Vom1r17), mRNA.; Rattus norvegicus vomeronasal V1r-type receptor V1rf4 mRNA, complete cds.; ensembl:known chromosome:Rnor_6.0:1:61219351:61220289:1 gene:ENSRNOG00000060716 gene_biotype:pseudogene transcript_biotype:pseudogene; Non-coding transcript identified by NONCODE			3	main
249	17612464	vomeronasal 1 receptor pseudogene 112	Vom1r-ps112			0.352256	up	0.10635	4.40623	4.05398	4.27695	3.76904	4.11595	4.41122	4.54113	4.26635	100362068	XM_008758822///XM_008774352	F1M266			GO:0007186	G-protein coupled receptor signaling pathway	GO:0016021; GO:0016020	integral component of membrane; membrane	GO:0016503	pheromone receptor activity		chr1	61993726	61996302	RefSeq; ENSEMBL	PREDICTED: Rattus norvegicus vomeronasal 1 receptor pseudogene 112 (Vom1r-ps112), transcript variant X2, mRNA.; PREDICTED: Rattus norvegicus vomeronasal 1 receptor pseudogene 112 (Vom1r-ps112), transcript variant X1, mRNA.; vomeronasal 1 receptor pseudogene 112 [gene_biotype:protein_coding transcript_biotype:protein_coding]	ENSRNOT00000059671	Pfam	3	main
250	17612467	vomeronasal 1 receptor 19	Vom1r19	AY510367|AY510368	Rn.129450	0.107244	up	0.228457	4.49217	4.38493	4.35839	4.39074	4.40565	4.62025	4.49302	4.36325	494298	NM_001008954	Q5J3E2	NM_001008954; ENSRNOT00000042702; AY510367; AY510368		GO:0007186	G-protein coupled receptor signaling pathway	GO:0016021; GO:0016020	integral component of membrane; membrane	GO:0016503	pheromone receptor activity		chr1	62260118	62261059	RefSeq; ENSEMBL; GenBank; NONCODE	Rattus norvegicus vomeronasal 1 receptor 19 (Vom1r19), mRNA.; vomeronasal 1 receptor 19 [gene_biotype:protein_coding transcript_biotype:protein_coding]; Rattus norvegicus vomeronasal V1r-type receptor V1rf6 mRNA, complete cds.; Rattus norvegicus vomeronasal V1r-type receptor V1rf7 mRNA, complete cds.; Non-coding transcript identified by NONCODE	ENSRNOT00000042702	Pfam	1	main
251	17612469	vomeronasal 1 receptor 20	Vom1r20	AY510344	Rn.129449	-0.121078	down	0.471779	3.92806	4.04914	3.80687	4.295	4.04555	4.00432	3.81333	3.96654	494225	NM_001009506	Q5J3G6	NM_001009506; ENSRNOT00000041434; AY510344		GO:0007186	G-protein coupled receptor signaling pathway	GO:0016021; GO:0016020	integral component of membrane; membrane	GO:0016503	pheromone receptor activity		chr1	62297765	62298673	RefSeq; ENSEMBL; GenBank; NONCODE	Rattus norvegicus vomeronasal 1 receptor 20 (Vom1r20), mRNA.; vomeronasal 1 receptor 20 [gene_biotype:protein_coding transcript_biotype:protein_coding]; Rattus norvegicus vomeronasal V1r-type receptor V1rf1 mRNA, complete cds.; Non-coding transcript identified by NONCODE	ENSRNOT00000041434	Pfam	1	main
252	17612471	vomeronasal 1 receptor 21	Vom1r21	AY510339	Rn.129448	-0.0746366	down	0.597795	3.09145	3.16608	3.3476	3.03764	3.11301	3.13438	3.22336	2.9166	494229	NM_001009510	Q5J3H1	NM_001009510; ENSRNOT00000059668; AY510339		GO:0007186	G-protein coupled receptor signaling pathway	GO:0016021; GO:0016020	integral component of membrane; membrane	GO:0016503	pheromone receptor activity		chr19	39317209	39318078	RefSeq; ENSEMBL; GenBank; NONCODE	Rattus norvegicus vomeronasal 1 receptor 21 (Vom1r21), mRNA.; vomeronasal 1 receptor 21 [gene_biotype:protein_coding transcript_biotype:protein_coding]; Rattus norvegicus vomeronasal V1r-type receptor V1rf3 mRNA, complete cds.; cdna:genscan chromosome:Rnor_6.0:19:28377249:28496671:1 transcript_biotype:protein_coding; Non-coding transcript identified by NONCODE	ENSRNOT00000059668	Pfam	1	main
253	17612473	zinc finger protein 679-like; hypothetical LOC100365524; zinc finger protein 813-like; zinc finger protein 271-like	LOC103691005; LOC100365524; LOC102557574; LOC102554200	BC161882	Rn.79618	0.105756	up	0.686904	6.11195	6.00619	5.88847	5.93769	6.19241	5.7097	6.13857	6.48758	103691005; 100365524; 102557574; 102554200	XM_008758855///XM_008758856///XM_008758858///XM_008774353///XM_008774354///XR_590011///XM_008758857		BC161882	brain| colon| connective tissue| kidney| ovary| placenta| adult								chrUn	0	15285	RefSeq; GenBank; NONCODE	PREDICTED: Rattus norvegicus zinc finger protein 679-like (LOC103691005), transcript variant X1, mRNA.; PREDICTED: Rattus norvegicus zinc finger protein 679-like (LOC103691005), transcript variant X2, mRNA.; PREDICTED: Rattus norvegicus hypothetical LOC100365524 (LOC100365524), transcript variant X2, mRNA.; PREDICTED: Rattus norvegicus zinc finger protein 813-like (LOC102557574), transcript varia…			1	main
254	17612482	zinc finger protein 420-like	LOC102552527			0.237845	up	0.459047	6.2451	6.00725	6.33469	5.47009	6.21697	6.05693	6.25601	6.42235	102552527	XM_006228079///XM_008774355	A0A0G2K3T8			GO:0006355	regulation of transcription, DNA-templated	GO:0005622	intracellular	GO:0003676; GO:0046872	nucleic acid binding; metal ion binding		chr1	63745535	63755908	RefSeq; ENSEMBL	PREDICTED: Rattus norvegicus zinc finger protein 420-like (LOC102552527), transcript variant X2, mRNA.; PREDICTED: Rattus norvegicus zinc finger protein 420-like (LOC102552527), transcript variant X1, mRNA.; ensembl:novel chromosome:Rnor_6.0:1:61268248:61276755:1 gene:ENSRNOG00000052406 gene_biotype:protein_coding transcript_biotype:protein_coding	ENSRNOT00000082730	Pfam	1	main
255	17612487	zinc finger protein 51	Zfp51	BC168865	Rn.219600	0.117677	up	0.744108	4.32032	4.20264	4.40834	3.79813	4.40145	3.78375	4.61682	4.56038	308232	NM_001107467///XM_006228023///XM_006228024///XM_006228025///XM_006228026///XM_008758762	B5DEZ5	NM_001107467; XM_006228023; XM_006228024; XM_006228025; XM_006228026; XM_008758762; ENSRNOT00000077642; BC168865	connective tissue| spleen| testis| adult	GO:0006355	regulation of transcription, DNA-templated	GO:0005622	intracellular	GO:0003676; GO:0046872; GO:0003700	nucleic acid binding; metal ion binding; transcription factor activity, sequence-specific DNA binding		chr1	63791367	63803750	RefSeq; ENSEMBL; GenBank; NONCODE	Rattus norvegicus zinc finger protein 51 (Zfp51), mRNA.; PREDICTED: Rattus norvegicus zinc finger protein 51 (Zfp51), transcript variant X1, mRNA.; PREDICTED: Rattus norvegicus zinc finger protein 51 (Zfp51), transcript variant X3, mRNA.; PREDICTED: Rattus norvegicus zinc finger protein 51 (Zfp51), transcript variant X4, mRNA.; PREDICTED: Rattus norvegicus zinc finger protein 51 (Zfp51), transcri…	ENSRNOT00000077642	Pfam	1	main
256	17612495	zinc finger protein 420-like	LOC102552284	FQ216188	Rn.176450	-0.288243	down	0.212179	3.92892	4.21717	4.30952	4.40145	3.94053	3.79106	3.799	4.19671	102552284	XM_008758851///XM_008758852///XM_008758853///XM_008758854///XM_008774356///XM_008774357///XM_008774358	A0A0G2JUN3	FQ216188	brain| eye| metamorphosing embryo| adult	GO:0006355	regulation of transcription, DNA-templated	GO:0005622	intracellular	GO:0003676; GO:0046872	nucleic acid binding; metal ion binding		chrUn	0	650	RefSeq; ENSEMBL; GenBank; NONCODE	PREDICTED: Rattus norvegicus zinc finger protein 420-like (LOC102552284), transcript variant X2, mRNA.; PREDICTED: Rattus norvegicus zinc finger protein 420-like (LOC102552284), transcript variant X4, mRNA.; PREDICTED: Rattus norvegicus zinc finger protein 420-like (LOC102552284), transcript variant X3, mRNA.; PREDICTED: Rattus norvegicus zinc finger protein 420-like (LOC102552284), transcript va…	ENSRNOT00000081213	Pfam	1	main
257	17612499	zinc finger protein 53	Zfp53		Rn.198476	-0.366804	down	0.0690366	3.66951	4.03632	4.24887	3.99952	3.86057	3.55849	3.8602	3.58985	308236	NM_001107468///XM_008758763	D3ZN28	NM_001107468; XM_008758763	adult	GO:0006355	regulation of transcription, DNA-templated	GO:0005622	intracellular	GO:0003676; GO:0003700; GO:0046872; GO:0005515	nucleic acid binding; transcription factor activity, sequence-specific DNA binding; metal ion binding; protein binding		chr1	62424006	62451949	RefSeq; ENSEMBL; NONCODE	Rattus norvegicus zinc finger protein 53 (Zfp53), mRNA.; PREDICTED: Rattus norvegicus zinc finger protein 53 (Zfp53), transcript variant X1, mRNA.; zinc finger protein 53 [gene_biotype:protein_coding transcript_biotype:protein_coding]; Non-coding transcript identified by NONCODE			1	main
258	17612506	zinc finger protein 52	Zfp52	BC085827	Rn.99395	0.084367	up	0.760574	5.29729	5.21292	5.62122	4.89909	5.11846	5.38857	5.49097	5.01233	361487	NM_001014158///XM_006228003	Q5U2X3	NM_001014158; XM_006228003; ENSRNOT00000050119; BC085827	brain| embryonic tissue| testis| metamorphosing embryo| juvenile| adult	GO:0006355	regulation of transcription, DNA-templated	GO:0005622	intracellular	GO:0003676; GO:0003700; GO:0046872	nucleic acid binding; transcription factor activity, sequence-specific DNA binding; metal ion binding		chr1	62472853	62500686	RefSeq; ENSEMBL; GenBank; NONCODE	Rattus norvegicus zinc finger protein 52 (Zfp52), mRNA.; PREDICTED: Rattus norvegicus zinc finger protein 52 (Zfp52), transcript variant X7, mRNA.; zinc finger protein 52 [gene_biotype:protein_coding transcript_biotype:protein_coding]; Rattus norvegicus zinc finger protein 52, mRNA (cDNA clone MGC:94286 IMAGE:7131994), complete cds.; Non-coding transcript identified by NONCODE	ENSRNOT00000050119	Pfam	1	main
259	17612515	zinc finger protein 420-like; zinc finger protein 736-like	LOC102550851; LOC103690390			0.0904993	up	0.419007	7.12319	7.03269	7.18837	6.8529	7.0568	7.08694	7.16921	7.11341	102550851; 103690390	XM_008758823///XM_008774359///XM_008774360///XM_008774361///XR_598719///XR_598720											chrUn	0	27732	RefSeq; ENSEMBL; NONCODE	PREDICTED: Rattus norvegicus zinc finger protein 420-like (LOC102550851), transcript variant X2, mRNA.; PREDICTED: Rattus norvegicus zinc finger protein 420-like (LOC102550851), transcript variant X1, partial mRNA.; PREDICTED: Rattus norvegicus zinc finger protein 736-like (LOC103690390), transcript variant X1, mRNA.; PREDICTED: Rattus norvegicus zinc finger protein 736-like (LOC103690390), trans…			1	main
260	17612524	zinc finger protein 761	Znf761			-0.0216737	down	0.763722	6.05466	6.07633	6.16415	6.01974	6.0451	6.04216	5.97403	6.14778	499056	XM_006222948///XM_006222949///XM_006222951///XM_006228009///XM_006228010///XM_006228011	D4A813			GO:0006355	regulation of transcription, DNA-templated	GO:0005622	intracellular	GO:0003676; GO:0046872; GO:0003700	nucleic acid binding; metal ion binding; transcription factor activity, sequence-specific DNA binding		chrUn	0	14086	RefSeq; ENSEMBL	PREDICTED: Rattus norvegicus zinc finger protein 761 (Znf761), transcript variant X1, mRNA.; PREDICTED: Rattus norvegicus zinc finger protein 761 (Znf761), transcript variant X3, mRNA.; PREDICTED: Rattus norvegicus zinc finger protein 761 (Znf761), transcript variant X2, mRNA.; zinc finger protein 51 [gene_biotype:protein_coding transcript_biotype:protein_coding]; cdna:genscan chromosome:Rnor_6.0…	ENSRNOT00000029111	Pfam	1	main
261	17612533	similar to 60S ribosomal protein L18a [Source:RGD Symbol;Acc:1565566]	RGD1565566			0.160473	up	0.089949	10.3827	10.2223	10.1284	10.2041	10.3343	10.4606	10.3302	10.3574			F1M0K6			GO:0006412	translation	GO:0005840; GO:0022625; GO:0030529	ribosome; cytosolic large ribosomal subunit; ribonucleoprotein complex	GO:0003735; GO:0044822	structural constituent of ribosome; poly(A) RNA binding		chr1	62626294	62626824	ENSEMBL	similar to 60S ribosomal protein L18a [gene_biotype:protein_coding transcript_biotype:protein_coding]; cdna:genscan chromosome:Rnor_6.0:1:61374460:61553973:1 transcript_biotype:protein_coding	ENSRNOT00000068694	Pfam	3	main
262	17612535	zinc finger protein 845-like; zinc finger protein 944 [Source:MGI Symbol;Acc:MGI:2442394]	LOC102548728; Zfp944			0.0366977	up	0.811465	6.35655	6.31985	6.28131	6.20604	6.47222	6.53557	6.40626	6.12782	102548728	XM_006222967///XM_006228086///XM_008758825///XM_008758826///XM_008758827///XM_008774368///XM_008774369///XM_008774370	A0A0G2K9S0			GO:0006355	regulation of transcription, DNA-templated	GO:0005622	intracellular	GO:0003676; GO:0046872	nucleic acid binding; metal ion binding		chr1	63953418	63979351	RefSeq; ENSEMBL	PREDICTED: Rattus norvegicus zinc finger protein 845-like (LOC102548728), transcript variant X4, mRNA.; PREDICTED: Rattus norvegicus zinc finger protein 845-like (LOC102548728), transcript variant X1, mRNA.; PREDICTED: Rattus norvegicus zinc finger protein 845-like (LOC102548728), transcript variant X2, mRNA.; PREDICTED: Rattus norvegicus zinc finger protein 845-like (LOC102548728), transcript va…	ENSRNOT00000090287	Pfam	1	main
263	17612540	vomeronasal 2 receptor, 12	Vom2r12		Rn.195720; Rn.217646	-0.0474834	down	0.624577	5.67454	5.72202	5.66952	5.76516	5.73139	5.50413	5.75698	5.7625	690566	NM_001099488///XM_008768625	A0A0G2JZW0; F1LZ25; D3ZN12; A0A0G2K8E2	NM_001099488; ENSRNOT00000081724		GO:0007186; GO:0007165	G-protein coupled receptor signaling pathway; signal transduction	GO:0005886; GO:0016021; GO:0016020	plasma membrane; integral component of membrane; membrane	GO:0004930; GO:0004871	G-protein coupled receptor activity; signal transducer activity		chr1	64572450	65854580	RefSeq; ENSEMBL; NONCODE	Rattus norvegicus vomeronasal 2 receptor, 12 (Vom2r12), mRNA.; PREDICTED: Rattus norvegicus vomeronasal type-2 receptor 26-like (LOC100910184), mRNA.; vomeronasal 2 receptor, 12 [gene_biotype:protein_coding transcript_biotype:protein_coding]; Protein LOC102557093 [gene_biotype:protein_coding transcript_biotype:protein_coding]; cdna:genscan chromosome:Rnor_6.0:11:38559963:38675175:-1 transcript_bi…	ENSRNOT00000081724; ENSRNOT00000041089; ENSRNOT00000042713; ENSRNOT00000088726	Pfam	3	main
264	17612547					-0.0460272	down	0.800361	3.01091	3.05694	3.16527	3.05622	2.94932	3.2736	3.03328	2.72585													chr1	64492833	64494495	ENSEMBL; NONCODE	cdna:genscan chromosome:Rnor_6.0:1:64860809:64907961:1 transcript_biotype:protein_coding; Non-coding transcript identified by NONCODE			1	main
265	17612549	vomeronasal 2 receptor, 13	Vom2r13		Rn.217646; Rn.195720	-0.0807302	down	0.750926	4.60129	4.68202	4.54031	4.44468	5.06106	4.74207	4.32071	4.74109	690593	NM_001099489	A0A0G2JZT8	NM_001099489; ENSRNOT00000086867		GO:0007186; GO:0007165	G-protein coupled receptor signaling pathway; signal transduction	GO:0005886; GO:0016021; GO:0016020	plasma membrane; integral component of membrane; membrane	GO:0004930; GO:0004871	G-protein coupled receptor activity; signal transducer activity		chr1	64572450	65854580	RefSeq; ENSEMBL	Rattus norvegicus vomeronasal 2 receptor, 13 (Vom2r13), mRNA.; vomeronasal 2 receptor, 12 [gene_biotype:protein_coding transcript_biotype:protein_coding]	ENSRNOT00000086867	Pfam	3	main
266	17612556					0.110713	up	0.721461	3.13197	3.02125	3.50368	2.76904	2.79104	2.81984	3.22947	3.34659													chr1	64302993	64626108					1	main
267	17612560	zinc finger protein 182-like	LOC102555377			-0.0490876	down	0.495283	6.25233	6.30142	6.24406	6.25091	6.40928	6.20133	6.32456	6.2311	102555377	XM_006222970///XM_006222971///XM_006222972///XM_006222973///XM_006228091///XM_006228092///XM_006228093///XM_006228094///XM_008758831///XM_008774373///XM_008774374	D4A025			GO:0006355	regulation of transcription, DNA-templated	GO:0005622	intracellular	GO:0003676; GO:0046872	nucleic acid binding; metal ion binding		chrUn	0	36274	RefSeq; ENSEMBL	PREDICTED: Rattus norvegicus zinc finger protein 182-like (LOC102555377), transcript variant X1, mRNA.; PREDICTED: Rattus norvegicus zinc finger protein 182-like (LOC102555377), transcript variant X3, mRNA.; PREDICTED: Rattus norvegicus zinc finger protein 182-like (LOC102555377), transcript variant X4, mRNA.; PREDICTED: Rattus norvegicus zinc finger protein 182-like (LOC102555377), transcript va…	ENSRNOT00000034746	Pfam	1	main
268	17612566	vomeronasal 2 receptor, 80	Vom2r80		Rn.218962	-0.186708	down	0.577136	4.81755	5.00426	4.62077	4.9435	5.44851	4.98286	4.43475	5.03504	502285	NM_001111321		NM_001111321									chrUn	0	13306	RefSeq	Rattus norvegicus vomeronasal 2 receptor, 80 (Vom2r80), mRNA.			1	main
269	17612573	vomeronasal 2 receptor, 16	Vom2r16		Rn.198000	0.0127828	up	0.976549	5.73356	5.72077	5.81363	6.22518	5.12351	6.10157	5.84908	5.25002	690691	NM_001099655	A0A0G2JYA5	NM_001099655; ENSRNOT00000080747		GO:0007186; GO:0007165	G-protein coupled receptor signaling pathway; signal transduction	GO:0005886; GO:0016021; GO:0016020	plasma membrane; integral component of membrane; membrane	GO:0004930; GO:0004871	G-protein coupled receptor activity; signal transducer activity		chrUn	0	18003	RefSeq; ENSEMBL	Rattus norvegicus vomeronasal 2 receptor, 16 (Vom2r16), mRNA.; vomeronasal 2 receptor, 16 [gene_biotype:protein_coding transcript_biotype:protein_coding]; cdna:genscan chromosome:Rnor_6.0:1:62754996:62935795:1 transcript_biotype:protein_coding	ENSRNOT00000080747	Pfam	1	main
270	17612580					-0.412983	down	0.218715	2.55403	2.96701	2.73507	2.66128	3.50469	2.68818	2.39114	2.58277													chrUn	0	15713					1	main
271	17612589	similar to putative pheromone receptor (Go-VN4)	LOC682526			-0.0385109	down	0.813038	3.73222	3.77073	3.65752	3.62072	4.03397	3.80625	3.81063	3.57979	682526	XM_006222981///XM_008758875	F1LZN5			GO:0007186; GO:0007165	G-protein coupled receptor signaling pathway; signal transduction	GO:0016021; GO:0016020	integral component of membrane; membrane	GO:0004930; GO:0004871	G-protein coupled receptor activity; signal transducer activity		chrUn	0	180299	RefSeq; ENSEMBL	PREDICTED: Rattus norvegicus similar to putative pheromone receptor (Go-VN4) (LOC682526), transcript variant X1, mRNA.; PREDICTED: Rattus norvegicus similar to putative pheromone receptor (Go-VN4) (LOC682526), transcript variant X2, mRNA.; Protein LOC682526 [gene_biotype:protein_coding transcript_biotype:protein_coding]; cdna:genscan chromosome:Rnor_6.0:1:65244456:65310440:1 transcript_biotype:pr…	ENSRNOT00000029893	Pfam	1	main
272	17612607	vomeronasal 2 receptor, 19	Vom2r19		Rn.217641	0.184399	up	0.187092	3.19085	3.00645	3.11181	3.05544	2.85211	3.03721	3.33089	3.20446	690729	NM_001099492///XM_008758849	D3ZDW0	NM_001099492; ENSRNOT00000046796		GO:0007186; GO:0007165	G-protein coupled receptor signaling pathway; signal transduction	GO:0005886; GO:0016021; GO:0016020	plasma membrane; integral component of membrane; membrane	GO:0004930; GO:0004871	G-protein coupled receptor activity; signal transducer activity		chr1	65295510	66274792	RefSeq; ENSEMBL; NONCODE	Rattus norvegicus vomeronasal 2 receptor, 19 (Vom2r19), mRNA.; vomeronasal 2 receptor, 19 [gene_biotype:protein_coding transcript_biotype:protein_coding]; PREDICTED: Rattus norvegicus vomeronasal type-2 receptor 116-like (LOC103689981), mRNA.; cdna:genscan chromosome:Rnor_6.0:1:65446416:65532290:1 transcript_biotype:protein_coding; Non-coding transcript identified by NONCODE	ENSRNOT00000046796	Pfam	1	main
273	17612614	vomeronasal 2 receptor, 21	Vom2r21	AF053991	Rn.145533; Rn.198478	0.120605	up	0.307656	3.39859	3.27798	3.17498	3.46593	3.19303	3.47561	3.39102	3.32913	100101439	XM_006228107///XM_003750425///XM_003750426///XM_003754369	O70415; A0A096MJB2; D3ZYR7	XM_006228107; AF053991; XM_003750425; ENSRNOT00000076373		GO:0007165; GO:0007186	signal transduction; G-protein coupled receptor signaling pathway	GO:0016020; GO:0016021; GO:0005886	membrane; integral component of membrane; plasma membrane	GO:0004871; GO:0004930	signal transducer activity; G-protein coupled receptor activity		chrUn	0	77864	RefSeq; GenBank; ENSEMBL; Havana transcript	PREDICTED: Rattus norvegicus vomeronasal 2 receptor, 21 (Vom2r21), mRNA.; Rattus norvegicus tissue-type vomeronasal neurons putative pheromone receptor V2R3 mRNA, partial cds.; PREDICTED: Rattus norvegicus vomeronasal 2 receptor, 22 (Vom2r22), transcript variant X1, mRNA.; PREDICTED: Rattus norvegicus vomeronasal type-2 receptor 26-like (LOC100910798), mRNA.; vomeronasal 2 receptor, 13 [gene_biot…	ENSRNOT00000040595; ENSRNOT00000076373; OTTRNOT00000001580; OTTRNOT00000001581	Pfam	1	main
274	17612639	vomeronasal 2 receptor, 18	Vom2r18	AF016181	Rn.10809; Rn.198478	-0.0124728	down	0.92974	3.34473	3.3572	3.27415	3.46073	3.33671	3.57233	3.30246	3.15939	286984	NM_173318///NM_001099656///XM_003750425	O35268; D3ZFX7; A0A096MJB2	NM_173318; AF016181; OTTRNOT00000001579; NM_001099656; XM_003750425; ENSRNOT00000044015; ENSRNOT00000071544; ENSRNOT00000076373		GO:0007186; GO:0007165	G-protein coupled receptor signaling pathway; signal transduction	GO:0005886; GO:0016021; GO:0016020	plasma membrane; integral component of membrane; membrane	GO:0004930; GO:0004871	G-protein coupled receptor activity; signal transducer activity		chr1	65765724	66274792	RefSeq; GenBank; Havana transcript; ENSEMBL; NONCODE	Rattus norvegicus vomeronasal 2 receptor, 18 (Vom2r18), mRNA.; Rattus norvegicus putative pheromone receptor (Go-VN4) mRNA, complete cds.; vomeronasal 2 receptor, 18[gene_biotype:protein_coding transcript_biotype:protein_coding]; Rattus norvegicus vomeronasal 2 receptor, 22 (Vom2r22), mRNA.; PREDICTED: Rattus norvegicus vomeronasal 2 receptor, 22 (Vom2r22), transcript variant X1, mRNA.; vomeronas…	OTTRNOT00000001579; ENSRNOT00000044015; ENSRNOT00000071544; ENSRNOT00000076373; OTTRNOT00000001580	Pfam	1	main
275	17612647	vomeronasal 2 receptor, 24	Vom2r24		Rn.217947	-0.439446	down	0.124361	4.20073	4.64017	4.64805	4.7754	4.49707	3.86963	4.13763	4.59492	690816	NM_001099493	M0RC83	NM_001099493; ENSRNOT00000072660		GO:0007186; GO:0007165	G-protein coupled receptor signaling pathway; signal transduction	GO:0005886; GO:0016021; GO:0016020	plasma membrane; integral component of membrane; membrane	GO:0004930; GO:0004871	G-protein coupled receptor activity; signal transducer activity		chrUn	0	30796	RefSeq; ENSEMBL; NONCODE	Rattus norvegicus vomeronasal 2 receptor, 24 (Vom2r24), mRNA.; vomeronasal 2 receptor, 24 [gene_biotype:protein_coding transcript_biotype:protein_coding]; cdna:genscan chromosome:Rnor_6.0:8:3983611:4003506:-1 transcript_biotype:protein_coding; Non-coding transcript identified by NONCODE	ENSRNOT00000072660	Pfam	1	main
276	17612654	vomeronasal 2 receptor, 25	Vom2r25		Rn.217948	-0.137399	down	0.0459787	2.8228	2.9602	2.97037	2.94795	2.96228	2.77355	2.918	2.77685	502286	NM_001099482///XM_008765901	M0RDF3	NM_001099482; ENSRNOT00000071085		GO:0007186; GO:0007165	G-protein coupled receptor signaling pathway; signal transduction	GO:0005886; GO:0016021; GO:0016020	plasma membrane; integral component of membrane; membrane	GO:0004930; GO:0004871	G-protein coupled receptor activity; signal transducer activity		chr8	3857535	3900584	RefSeq; ENSEMBL; NONCODE	Rattus norvegicus vomeronasal 2 receptor, 25 (Vom2r25), mRNA.; vomeronasal 2 receptor, 25 [gene_biotype:protein_coding transcript_biotype:protein_coding]; PREDICTED: Rattus norvegicus vomeronasal type-2 receptor 116-like (LOC103689970), mRNA.; cdna:genscan chromosome:Rnor_6.0:8:3758477:3901362:-1 transcript_biotype:protein_coding; Non-coding transcript identified by NONCODE	ENSRNOT00000071085	Pfam	1	main
277	17612661	vomeronasal 2 receptor, pseudogene 39	Vom2r-ps39			-0.277038	down	0.047739	2.3296	2.60664	2.73691	2.61466	2.46835	2.43446	2.32807	2.22627	502287	XR_593754///XR_602018											chr8	3791035	3793051	RefSeq; ENSEMBL	PREDICTED: Rattus norvegicus vomeronasal 2 receptor, pseudogene 39 (Vom2r-ps39), misc_RNA.; cdna:genscan chromosome:Rnor_6.0:8:3758477:3901362:-1 transcript_biotype:protein_coding			1	main
278	17612665					0.47172	up	0.0563235	6.27808	5.80636	5.81607	5.53566	6.06736	6.45475	6.17921	6.20029													chr14	62489111	62491769	ENSEMBL	cdna:genscan chromosome:Rnor_6.0:14:62388436:62412988:-1 transcript_biotype:protein_coding			3	main
279	17612669	vomeronasal 1 receptor 110	Vom1r110	AY510352	Rn.129439	0.0957834	up	0.492007	4.30911	4.21333	4.10184	4.20174	4.3364	4.51424	4.25956	4.15353	494299	NM_001008953	Q5J3F8; Q5J3F4; Q5J3F9	NM_001008953; ENSRNOT00000078889; AY510352		GO:0007186	G-protein coupled receptor signaling pathway	GO:0016021; GO:0016020	integral component of membrane; membrane	GO:0016503	pheromone receptor activity		chr1	69504405	69505322	RefSeq; ENSEMBL; GenBank; NONCODE	Rattus norvegicus vomeronasal 1 receptor 110 (Vom1r110), mRNA.; vomeronasal 1 receptor 110 [gene_biotype:protein_coding transcript_biotype:protein_coding]; Rattus norvegicus vomeronasal V1r-type receptor V1re18 mRNA, complete cds.; Non-coding transcript identified by NONCODE	ENSRNOT00000078889	Pfam	3	main
280	17612671	vomeronasal 1 receptor 28	Vom1r28	AY510353	Rn.129438	-0.00710163	down	0.970187	2.05988	2.06698	2.18535	1.9435	2.07208	1.86936	1.92314	2.38713	494308	NM_001008966///XM_008758872	Q5J3F7	NM_001008966; AY510353; ENSRNOT00000044950		GO:0007186	G-protein coupled receptor signaling pathway	GO:0016021; GO:0016020	integral component of membrane; membrane	GO:0016503	pheromone receptor activity		chr1	69520817	69521749	RefSeq; GenBank; ENSEMBL	Rattus norvegicus vomeronasal 1 receptor 28 (Vom1r28), mRNA.; Rattus norvegicus vomeronasal V1r-type receptor V1re16 mRNA, complete cds.; PREDICTED: Rattus norvegicus vomeronasal type-1 receptor 4-like (LOC103691019), mRNA.; vomeronasal type-1 receptor 4-like [gene_biotype:protein_coding transcript_biotype:protein_coding]; vomeronasal 1 receptor 28 [gene_biotype:protein_coding transcript_biotype:…	ENSRNOT00000090830; ENSRNOT00000044950	Pfam	3	main
281	17612673	vomeronasal 1 receptor 29	Vom1r29	AY510346	Rn.129437	0.105573	up	0.44776	3.77564	3.67007	3.61667	3.49839	3.89515	3.81769	3.68773	3.8215	494292	NM_001008946	Q5J3G4	NM_001008946; ENSRNOT00000075596; AY510346		GO:0007186	G-protein coupled receptor signaling pathway	GO:0016021; GO:0016020	integral component of membrane; membrane	GO:0016503	pheromone receptor activity		chr1	69564386	69565303	RefSeq; ENSEMBL; GenBank	Rattus norvegicus vomeronasal 1 receptor 29 (Vom1r29), mRNA.; vomeronasal 1 receptor 29 [gene_biotype:protein_coding transcript_biotype:protein_coding]; Rattus norvegicus vomeronasal V1r-type receptor V1re10 mRNA, complete cds.; ensembl:known chromosome:Rnor_6.0:1:63245803:63246720:1 gene:ENSRNOG00000054778 gene_biotype:protein_coding transcript_biotype:protein_coding	ENSRNOT00000075596; ENSRNOT00000079358	Pfam	1	main
282	17612675	vomeronasal 1 receptor 109	Vom1r109	AY510360	Rn.144524	0.0959914	up	0.410195	5.27479	5.1788	5.15	5.0808	5.3056	5.22155	5.16964	5.43318	494228	NM_001009509///XM_006228164///XM_008774396	Q5J3F0	NM_001009509; AY510360; ENSRNOT00000088203		GO:0007186	G-protein coupled receptor signaling pathway	GO:0016021; GO:0016020	integral component of membrane; membrane	GO:0016503	pheromone receptor activity		chr1	69582308	69583168	RefSeq; GenBank; ENSEMBL	Rattus norvegicus vomeronasal 1 receptor 109 (Vom1r109), mRNA.; Rattus norvegicus vomeronasal V1r-type receptor V1re17 mRNA, complete cds.; PREDICTED: Rattus norvegicus vomeronasal type-1 receptor 4-like (LOC100911184), mRNA.; vomeronasal 1 receptor 109 [gene_biotype:protein_coding transcript_biotype:protein_coding]; ensembl:known chromosome:Rnor_6.0:1:68545496:68546355:1 gene:ENSRNOG00000049412 …	ENSRNOT00000070823; ENSRNOT00000088203	Pfam	3	main
283	17612677	vomeronasal 1 receptor 30	Vom1r30	AY510321	Rn.129435	-0.0421359	down	0.763697	3.94481	3.98694	3.87516	3.94519	4.14048	4.14349	3.89944	3.79149	494230	NM_001009511	Q5J3I9	NM_001009511; ENSRNOT00000086294; AY510321		GO:0007186	G-protein coupled receptor signaling pathway	GO:0016021; GO:0016020	integral component of membrane; membrane	GO:0016503	pheromone receptor activity		chr1	69651853	69652746	RefSeq; ENSEMBL; GenBank; NONCODE	Rattus norvegicus vomeronasal 1 receptor 30 (Vom1r30), mRNA.; vomeronasal 1 receptor 30 [gene_biotype:protein_coding transcript_biotype:protein_coding]; Rattus norvegicus vomeronasal V1r-type receptor V1rl1 mRNA, complete cds.; cdna:genscan chromosome:Rnor_6.0:1:63333304:63391063:1 transcript_biotype:protein_coding; Non-coding transcript identified by NONCODE	ENSRNOT00000086294	Pfam	1	main
284	17612679	paired Ig-like receptor B	Pirb	AF082534	Rn.207196	0.158967	up	0.254405	4.1201	3.96113	3.77361	4.11564	3.99413	4.05954	4.25073	4.05003	65146	NM_031713	A2J8C0; D3ZQX2	NM_031713; ENSRNOT00000084439; AF082534	connective tissue| lung| juvenile| adult	GO:0001782; GO:0019221; GO:0019724; GO:0043011	B cell homeostasis; cytokine-mediated signaling pathway; B cell mediated immunity; myeloid dendritic cell differentiation	GO:0016021; GO:0016020	integral component of membrane; membrane				chr1	70045572	70053423	RefSeq; ENSEMBL; GenBank; NONCODE	Rattus norvegicus paired Ig-like receptor B (Pirb), mRNA.; leukocyte immunoglobulin-like receptor, subfamily B (with TM and ITIM domains), member 3 [gene_biotype:protein_coding transcript_biotype:protein_coding]; Rattus norvegicus type 1 one-pass transmembrane Ig-like receptor (NILR-1) mRNA, complete cds.; cdna:genscan chromosome:Rnor_6.0:1:63711178:63741117:1 transcript_biotype:protein_coding; N…			1	main				o			o					o
285	17612693	leukocyte immunoglobulin-like receptor, subfamily B (with TM and ITIM domains), member 3A; leukocyte immunoglobulin-like receptor, subfamily B (with TM and ITIM domains), member 3B; leukocyte immunoglobulin-like receptor, subfamily B (with TM and ITIM domains), member 3-like	Lilrb3a; Lilrb3b; Lilrb3l	AF169636|AF169637|FQ230146|AF169638	Rn.198481; Rn.225038; Rn.225377	0.151601	up	0.442029	3.82129	3.66969	3.7191	3.48651	3.80346	4.12017	3.70277	3.64093	683463; 690955; 361493	NM_001313924///NM_001313948///XM_001066042///XM_001076302///XM_003748713///XM_006223021///XM_006223022///XM_006223023///XM_006223024///XM_006228032///XM_006228033///XM_006228034///XM_006228061///XM_006228062///XM_006228063///XM_006228064///XM_006228067///XM_006228068///XM_006228069///XM_006228070///NM_001037357	A2JHX6; A2JHX5; D3ZVL0; A0A0G2JYU1; D3ZVK8; A0A0G2KBC9; A0A0G2K607	XM_006228032; XM_006228033; XM_006228034; AF169636; AF169637; FQ230146; NM_001037357; AF169638; ENSRNOT00000080799; ENSRNOT00000080820; ENSRNOT00000087669; ENSRNOT00000087957	brain| adult; connective tissue| eye| liver| lung| prostate| juvenile| adult; eye	GO:0001915; GO:0002230; GO:0002309; GO:0002740; GO:0002774; GO:0007165; GO:0009615; GO:0010628; GO:0014063; GO:0032609; GO:0032689; GO:0032945; GO:0035548; GO:0042130; GO:0042536; GO:0043065; GO:0045077; GO:0045786; GO:0045806; GO:0045919; GO:0045953; GO:0046636; GO:0051607; GO:0051926; GO:0071222; GO:0072643; GO:0097028; GO:2000669; GO:2001180; GO:2001183; GO:2001186; GO:2001189; GO:2001193; GO:…	negative regulation of T cell mediated cytotoxicity; positive regulation of defense response to virus by host; T cell proliferation involved in immune response; negative regulation of cytokine secretion involved in immune response; Fc receptor mediated inhibitory signaling pathway; signal transduction; response to virus; positive regulation of gene expression; negative regulation of serotonin sec…	GO:0016021; GO:0016020; GO:0005737; GO:0009897	integral component of membrane; membrane; cytoplasm; external side of plasma membrane	GO:0008157; GO:0030107; GO:0030109; GO:0032393; GO:0042169; GO:0042288; GO:0042803	protein phosphatase 1 binding; HLA-A specific inhibitory MHC class I receptor activity; HLA-B specific inhibitory MHC class I receptor activity; MHC class I receptor activity; SH2 domain binding; MHC class I protein binding; protein homodimerization activity		chrUn	0	142114	RefSeq; GenBank; ENSEMBL; NONCODE	Rattus norvegicus leukocyte immunoglobulin-like receptor, subfamily B (with TM and ITIM domains), member 3A (Lilrb3a), mRNA.; Rattus norvegicus leukocyte immunoglobulin-like receptor, subfamily B (with TM and ITIM domains), member 3B (Lilrb3b), mRNA.; PREDICTED: Rattus norvegicus similar to paired-Ig-like receptor B (LOC690955), transcript variant X1, mRNA.; PREDICTED: Rattus norvegicus similar t…			1	main				o			o				o
286	17612726					-0.136423	down	0.716443	3.92221	4.05863	3.84217	4.38208	3.95166	4.08066	4.35959	3.32638													chr1	70086973	70093609	ENSEMBL	cdna:genscan chromosome:Rnor_6.0:1:63759654:63789928:1 transcript_biotype:protein_coding			1	main
287	17612736	hypothetical protein LOC683420	LOC683420			-0.103261	down	0.426175	7.86006	7.96332	7.85435	8.05414	7.98147	8.02852	7.67921	7.87245	683420	XM_006223033///XM_008758873											chr1	62825539	62828600	RefSeq; ENSEMBL	PREDICTED: Rattus norvegicus hypothetical protein LOC683420 (LOC683420), transcript variant X1, partial mRNA.; PREDICTED: Rattus norvegicus hypothetical protein LOC683420 (LOC683420), transcript variant X2, mRNA.; cdna:genscan chromosome:Rnor_6.0:1:63832531:63834750:1 transcript_biotype:protein_coding			3	main
288	17612738	leukocyte immunoglobulin-like receptor, subfamily B (with TM and ITIM domains), member 1; leukocyte immunoglobulin-like receptor, subfamily A (without TM domain), member 3	Lilrb1; Lilra3		Rn.225377	0.160281	up	0.48768	2.43693	2.27665	2.14724	2.45714	2.22557	2.36885	2.79151	2.15043	100912456; 100912499	XM_003748711///XM_006228039///XM_006228040///XM_006228042///XM_006228043///XM_006228047///XM_006228050///XM_001076276///XM_006223019///XM_006228055///XM_006228056///XM_006228058///XM_006228059///XM_008774397	A0A0G2KAU3	XM_001076276; XM_006223019; XM_006228055; XM_006228056; XM_006228058; XM_006228059; XM_008774397	eye	GO:0001915; GO:0002230; GO:0002309; GO:0002740; GO:0002774; GO:0007165; GO:0009615; GO:0010628; GO:0014063; GO:0032609; GO:0032689; GO:0032945; GO:0035548; GO:0042130; GO:0042536; GO:0043065; GO:0045077; GO:0045786; GO:0045806; GO:0045919; GO:0045953; GO:0046636; GO:0051607; GO:0051926; GO:0071222; GO:0072643; GO:0097028; GO:2000669; GO:2001180; GO:2001183; GO:2001186; GO:2001189; GO:2001193; GO:…	negative regulation of T cell mediated cytotoxicity; positive regulation of defense response to virus by host; T cell proliferation involved in immune response; negative regulation of cytokine secretion involved in immune response; Fc receptor mediated inhibitory signaling pathway; signal transduction; response to virus; positive regulation of gene expression; negative regulation of serotonin sec…	GO:0005737; GO:0009897	cytoplasm; external side of plasma membrane	GO:0008157; GO:0030107; GO:0030109; GO:0032393; GO:0042169; GO:0042288; GO:0042803	protein phosphatase 1 binding; HLA-A specific inhibitory MHC class I receptor activity; HLA-B specific inhibitory MHC class I receptor activity; MHC class I receptor activity; SH2 domain binding; MHC class I protein binding; protein homodimerization activity		chr1	62956394	62987126	RefSeq; ENSEMBL; NONCODE	PREDICTED: Rattus norvegicus leukocyte immunoglobulin-like receptor subfamily B member 3-like (LOC100912456), transcript variant X2, mRNA.; PREDICTED: Rattus norvegicus leukocyte immunoglobulin-like receptor subfamily B member 3-like (LOC100912456), transcript variant X3, mRNA.; PREDICTED: Rattus norvegicus leukocyte immunoglobulin-like receptor subfamily B member 3-like (LOC100912456), transcrip…			1	main				o			o				o
289	17612750	membrane bound O-acyltransferase domain containing 7	Mboat7	BC169089|FQ223429	Rn.44782	0.0723863	up	0.758589	9.28281	9.21042	9.3962	9.17259	9.06246	9.27327	9.62838	8.94676	308309	NM_001134978///NM_001313940	B5DFK0; G3V7N6	NM_001134978; ENSRNOT00000078640; BC169089; FQ223429	brain| colon| connective tissue| dorsal root ganglion| embryonic tissue| eye| heart| kidney| lung| ovary| placenta| prostate| spleen| thymus|tailbud embryo| metamorphosing embryo| fetus| juvenile| adult	GO:0021591; GO:0021819; GO:0046488	ventricular system development; layer formation in cerebral cortex; phosphatidylinositol metabolic process	GO:0016020; GO:0016021	membrane; integral component of membrane	GO:0071617	lysophospholipid acyltransferase activity		chr1	63024114	63038392	RefSeq; ENSEMBL; GenBank; NONCODE	Rattus norvegicus membrane bound O-acyltransferase domain containing 7 (Mboat7), mRNA.; membrane bound O-acyltransferase domain containing 7 [gene_biotype:protein_coding transcript_biotype:protein_coding]; Rattus norvegicus leukocyte receptor cluster (LRC) member 4, mRNA (cDNA clone MGC:189503 IMAGE:5598892), complete cds.; Rattus norvegicus lysophospholipid acyltransferase 7 (LOC103689982), mRNA…	ENSRNOT00000078640; ENSRNOT00000090873	Pfam	1	main							o			o
290	17612760	transmembrane channel-like 4; transmembrane channel-like protein 4	Tmc4; LOC103690093	BC100657	Rn.138375	0.217367	up	0.23906	5.48033	5.26296	5.29741	5.06568	5.4258	5.70489	5.42331	5.31279	308310; 103690093	NM_001034104///XM_008758838///XM_008758838	Q496Z4; F1LPZ2	NM_001034104; ENSRNOT00000080466; ENSRNOT00000085010; BC100657	kidney| lung| pancreas| placenta| prostate| small intestine| juvenile| adult	GO:0006811; GO:0006810	ion transport; transport	GO:0016021; GO:0070062; GO:0016020	integral component of membrane; extracellular exosome; membrane				chr1	63038642	63118858	RefSeq; ENSEMBL; GenBank; NONCODE	Rattus norvegicus transmembrane channel-like 4 (Tmc4), mRNA.; PREDICTED: Rattus norvegicus transmembrane channel-like protein 4 (LOC103690093), mRNA.; transmembrane channel-like 4 [gene_biotype:protein_coding transcript_biotype:protein_coding]; Rattus norvegicus transmembrane channel-like 4, mRNA (cDNA clone MGC:124845 IMAGE:7936370), complete cds.; cdna:genscan chromosome:Rnor_6.0:1:64032718:640…	ENSRNOT00000080466; ENSRNOT00000085010	Pfam	1	main
291	17612778	leukocyte receptor cluster (LRC) member 1	Leng1		Rn.49070	-0.109924	down	0.578659	5.65859	5.76851	5.81716	5.74002	5.74836	5.33863	5.67394	5.96321	292535	NM_001106218	D3ZER8	NM_001106218; ENSRNOT00000091742	brain| colon| connective tissue| eye| heart| pancreas| placenta| prostate| thymus| juvenile| adult					GO:0005515	protein binding		chr1	63119164	63124096	RefSeq; ENSEMBL; NONCODE	Rattus norvegicus leukocyte receptor cluster (LRC) member 1 (Leng1), mRNA.; leukocyte receptor cluster (LRC) member 1 [gene_biotype:protein_coding transcript_biotype:protein_coding]; cdna:genscan chromosome:Rnor_6.0:1:64126922:64130791:1 transcript_biotype:protein_coding; Non-coding transcript identified by NONCODE			1	main
292	17612784	TCF3 (E2A) fusion partner	Tfpt	AB029495	Rn.12922	-0.080644	down	0.56529	7.56941	7.65005	7.49641	7.54831	7.90543	7.58308	7.57075	7.55438	85423	NM_138870///XM_006228036///XM_006228037	Q9JMG6; A0A0G2K9T8	NM_138870; XM_006228036; XM_006228037; ENSRNOT00000089713; AB029495	adrenal gland| brain| colon| connective tissue| heart| pancreas| prostate| metamorphosing embryo| juvenile| adult	GO:0006281; GO:0006310; GO:0006351; GO:0006355; GO:0006915; GO:0008584; GO:0043065; GO:0097190; GO:0006974	DNA repair; DNA recombination; transcription, DNA-templated; regulation of transcription, DNA-templated; apoptotic process; male gonad development; positive regulation of apoptotic process; apoptotic signaling pathway; cellular response to DNA damage stimulus	GO:0005634; GO:0005654; GO:0005730; GO:0005737; GO:0005884; GO:0031011; GO:0031965	nucleus; nucleoplasm; nucleolus; cytoplasm; actin filament; Ino80 complex; nuclear membrane	GO:0003677; GO:0005515; GO:0019901; GO:0046982	DNA binding; protein binding; protein kinase binding; protein heterodimerization activity		chr1	63155152	63164554	RefSeq; ENSEMBL; GenBank; NONCODE	Rattus norvegicus TCF3 (E2A) fusion partner (Tfpt), mRNA.; PREDICTED: Rattus norvegicus TCF3 (E2A) fusion partner (Tfpt), transcript variant X1, mRNA.; PREDICTED: Rattus norvegicus TCF3 (E2A) fusion partner (Tfpt), transcript variant X2, mRNA.; TCF3 (E2A) fusion partner [gene_biotype:protein_coding transcript_biotype:protein_coding]; Rattus norvegicus mRNA for Amida, complete cds.; cdna:genscan c…			1	main	o
293	17612790	osteoclast associated, immunoglobulin-like receptor	Oscar		Rn.226838	-0.0378793	down	0.671497	5.99053	6.02841	6.0668	5.92403	6.09441	6.07442	5.86502	6.03216	292537	NM_001184973///XM_006228020	D3ZCA1	NM_001184973; XM_006228020; ENSRNOT00000090790				GO:0016021; GO:0070062; GO:0016020	integral component of membrane; extracellular exosome; membrane				chr1	63173817	63180053	RefSeq; ENSEMBL	Rattus norvegicus osteoclast associated, immunoglobulin-like receptor (Oscar), mRNA.; PREDICTED: Rattus norvegicus osteoclast associated, immunoglobulin-like receptor (Oscar), transcript variant X1, mRNA.; Protein Oscar; Similar to osteoclast-associated receptor mOSCAR-M1 (Predicted) [gene_biotype:protein_coding transcript_biotype:protein_coding]; cdna:genscan chromosome:Rnor_6.0:1:64182477:64292…			1	main
294	17612797	osteoclast-associated receptor-like	LOC100359972		Rn.140574	-0.0345506	down	0.764801	4.55696	4.59151	4.52041	4.74737	4.50674	4.47755	4.48749	4.70584	100359972	XM_002725506///XM_002728680		XM_002725506; XM_002728680	prostate								chr1	63222667	63226807	RefSeq; ENSEMBL	PREDICTED: Rattus norvegicus osteoclast-associated receptor-like (LOC100359972), mRNA.; ensembl:novel chromosome:Rnor_6.0:1:64235203:64237407:1 gene:ENSRNOG00000055796 gene_biotype:lincRNA transcript_biotype:lincRNA; cdna:genscan chromosome:Rnor_6.0:1:64182477:64292545:1 transcript_biotype:protein_coding			1	main
295	17612802	T cell-interacting, activating receptor on myeloid cells 1	Tarm1			-0.204319	down	0.0248901	4.26018	4.4645	4.51882	4.46186	4.41283	4.35885	4.20051	4.22118	499065	XM_008758841///XM_008774399	D3ZW99					GO:0016021; GO:0016020	integral component of membrane; membrane				chr1	63238199	63246773	RefSeq; ENSEMBL	PREDICTED: Rattus norvegicus T cell-interacting, activating receptor on myeloid cells 1 (Tarm1), mRNA.; T cell-interacting, activating receptor on myeloid cells 1 [gene_biotype:protein_coding transcript_biotype:protein_coding]; cdna:genscan chromosome:Rnor_6.0:1:64182477:64292545:1 transcript_biotype:protein_coding			1	main
296	17612808	V-set and transmembrane domain containing 1	Vstm1			0.0584752	up	0.622386	3.96361	3.90513	3.91391	3.96249	3.83898	4.08956	4.04332	3.75793	100360054	XM_002725507///XM_002728681											chr1	63253851	63266683	RefSeq; ENSEMBL	PREDICTED: Rattus norvegicus V-set and transmembrane domain containing 1 (Vstm1), mRNA.; cdna:genscan chromosome:Rnor_6.0:1:64182477:64292545:1 transcript_biotype:protein_coding			1	main
297	17612815					0.395953	up	0.004527	7.81901	7.42306	7.42063	7.48565	7.3629	7.90082	7.85173	7.70448													chr1	63458523	63459111	ENSEMBL	cdna:genscan chromosome:Rnor_6.0:1:64466629:64481903:1 transcript_biotype:protein_coding			3	main
298	17612818					0.166662	up	0.619824	4.02422	3.85756	4.29948	3.9506	3.32259	4.26635	3.89567	3.91064		NM_001000538											chrUn	0	975	RefSeq; ENSEMBL	Rattus norvegicus olfactory receptor 1-like (Olr1l), mRNA.; olfactory receptor 1-like [gene_biotype:protein_coding transcript_biotype:protein_coding]; cdna:genscan chromosome:Rnor_6.0:1:64466629:64481903:1 transcript_biotype:protein_coding			3	main
299	17612820	NLR family, pyrin domain containing 12	Nlrp12		Rn.108865	-0.213729	down	0.268988	5.45764	5.67136	5.65452	5.45594	5.90364	5.27471	5.46013	5.63807	292541	NM_001169142///XM_008758753	A0A0G2JW23	NM_001169142; XM_008758753; ENSRNOT00000086331	connective tissue| adult	GO:0008588; GO:0009968; GO:0031953; GO:0032088; GO:0036336; GO:0043122; GO:0043124; GO:0043281; GO:0045345; GO:0045409; GO:0045751; GO:0050710; GO:0050711; GO:0050728; GO:0070373; GO:0071345; GO:1901223	release of cytoplasmic sequestered NF-kappaB; negative regulation of signal transduction; negative regulation of protein autophosphorylation; negative regulation of NF-kappaB transcription factor activity; dendritic cell migration; regulation of I-kappaB kinase/NF-kappaB signaling; negative regulation of I-kappaB kinase/NF-kappaB signaling; regulation of cysteine-type endopeptidase activity invol…	GO:0005634; GO:0005737	nucleus; cytoplasm	GO:0005524; GO:0000166; GO:0005515	ATP binding; nucleotide binding; protein binding		chr1	63493720	63521353	RefSeq; ENSEMBL	Rattus norvegicus NLR family, pyrin domain containing 12 (Nlrp12), mRNA.; PREDICTED: Rattus norvegicus NLR family, pyrin domain containing 12 (Nlrp12), transcript variant X1, mRNA.; NLR family, pyrin domain containing 12 [gene_biotype:protein_coding transcript_biotype:protein_coding]; cdna:genscan chromosome:Rnor_6.0:1:64506950:64534715:1 transcript_biotype:protein_coding	ENSRNOT00000086331	Pfam	1	main										o
300	17612831	similar to solute carrier family 7 (cationic amino acid transporter, y+ system), member 3	LOC292543	BC098062	Rn.137080	-0.166409	down	0.350115	4.39918	4.56559	4.50257	4.61355	4.58065	4.58154	4.09314	4.52287	292543	NM_001025639///XM_006228022///XM_008758754	Q4V799; D3ZBE1	NM_001025639; XM_006228022; XM_008758754; ENSRNOT00000091279; BC098062	placenta| adult	GO:0003333; GO:0006865; GO:0097638; GO:1903352; GO:1903401	amino acid transmembrane transport; amino acid transport; L-arginine import across plasma membrane; L-ornithine transmembrane transport; L-lysine transmembrane transport	GO:0016021; GO:0005887; GO:0016020	integral component of membrane; integral component of plasma membrane; membrane	GO:0015171; GO:0000064; GO:0015181; GO:0015189; GO:0015297	amino acid transmembrane transporter activity; L-ornithine transmembrane transporter activity; arginine transmembrane transporter activity; L-lysine transmembrane transporter activity; antiporter activity		chr1	63610443	63624678	RefSeq; ENSEMBL; GenBank	Rattus norvegicus similar to solute carrier family 7 (cationic amino acid transporter, y+ system), member 3 (LOC292543), mRNA.; PREDICTED: Rattus norvegicus similar to solute carrier family 7 (cationic amino acid transporter, y+ system), member 3 (LOC292543), transcript variant X2, mRNA.; PREDICTED: Rattus norvegicus similar to solute carrier family 7 (cationic amino acid transporter, y+ system),…	ENSRNOT00000091279	Pfam	1	main
301	17612847	vomeronasal 2 receptor, pseudogene 45	Vom2r-ps45	AF016183	Rn.10811	0.136054	up	0.185135	5.18219	5.04613	4.98845	5.08875	5.06119	5.28893	5.23126	5.02636	286982	XR_590097///XR_598732	O35270; F1M924	XR_590097; XR_598732; AF016183		GO:0007186	G-protein coupled receptor signaling pathway	GO:0016020; GO:0016021	membrane; integral component of membrane	GO:0004930	G-protein coupled receptor activity		chrUn	0	28457	RefSeq; GenBank; ENSEMBL; NONCODE	PREDICTED: Rattus norvegicus vomeronasal 2 receptor, pseudogene 45 (Vom2r-ps45), transcript variant X2, misc_RNA.; PREDICTED: Rattus norvegicus vomeronasal 2 receptor, pseudogene 45 (Vom2r-ps45), transcript variant X1, misc_RNA.; Rattus norvegicus putative pheromone receptor (Go-VN6) mRNA, complete cds.; Uncharacterized protein [gene_biotype:protein_coding transcript_biotype:protein_coding]; Non-…	ENSRNOT00000021046	Pfam	1	main
302	17612856	vomeronasal 2 receptor, 28	Vom2r28		Rn.217628	0.141041	up	0.625955	2.81019	2.66915	2.99521	2.40897	2.60326	3.12537	2.42665	2.87854	292547	NM_001099472	D4ADJ0	NM_001099472; ENSRNOT00000038169		GO:0007186; GO:0007165	G-protein coupled receptor signaling pathway; signal transduction	GO:0005886; GO:0016021; GO:0016020	plasma membrane; integral component of membrane; membrane	GO:0004930; GO:0004871	G-protein coupled receptor activity; signal transducer activity		chrUn	0	29083	RefSeq; ENSEMBL; NONCODE	Rattus norvegicus vomeronasal 2 receptor, 28 (Vom2r28), mRNA.; vomeronasal 2 receptor, 28 [gene_biotype:protein_coding transcript_biotype:protein_coding]; cdna:genscan chromosome:Rnor_6.0:1:69565856:69589096:1 transcript_biotype:protein_coding; Non-coding transcript identified by NONCODE	ENSRNOT00000038169	Pfam	1	main
303	17612863	zinc finger protein 418	Zfp418	FQ212491	Rn.15995	-0.0039346	down	0.95891	7.69083	7.69476	7.80096	7.68631	7.59701	7.7691	7.63157	7.6718	292548	NM_001191620///XM_006228177///XM_008759084	A0A0G2K5M4; D3ZVT0	NM_001191620; XM_006228177; FQ212491; ENSRNOT00000020751; ENSRNOT00000084806	brain| embryonic tissue| eye| liver| spleen| metamorphosing embryo| adult	GO:0006355	regulation of transcription, DNA-templated	GO:0005634; GO:0005622	nucleus; intracellular	GO:0000978; GO:0046872; GO:0003676	RNA polymerase II core promoter proximal region sequence-specific DNA binding; metal ion binding; nucleic acid binding		chr1	71012423	71025541	RefSeq; GenBank; ENSEMBL	Rattus norvegicus zinc finger protein 418 (Zfp418), mRNA.; PREDICTED: Rattus norvegicus zinc finger protein 418 (Zfp418), transcript variant X1, mRNA.; Rattus norvegicus TL0AAA53YE06 mRNA sequence.; PREDICTED: Rattus norvegicus zinc finger protein 135-like (LOC103691059), partial mRNA.; similar to zinc finger protein 418 [gene_biotype:protein_coding transcript_biotype:protein_coding]	ENSRNOT00000020751; ENSRNOT00000084806	Pfam	1	main
304	17612870					0.221994	up	0.28767	4.94076	4.71877	4.98128	4.53549	4.63954	5.06225	4.69833	5.06171													chr1	71027314	71027594					3	main
305	17612872	similar to zinc finger protein 418	LOC691135			0.0463253	up	0.873195	6.94797	6.90165	6.89079	6.59186	7.2223	7.35268	6.72998	6.76126	691135	XM_006223034///XM_008759083///XM_008774401///XM_008774402											chr1	71069972	71082227	RefSeq	PREDICTED: Rattus norvegicus similar to zinc finger protein 418 (LOC691135), transcript variant X1, mRNA.; PREDICTED: Rattus norvegicus similar to zinc finger protein 418 (LOC691135), transcript variant X1, partial mRNA.; PREDICTED: Rattus norvegicus similar to zinc finger protein 418 (LOC691135), transcript variant X2, mRNA.; PREDICTED: Rattus norvegicus similar to zinc finger protein 418 (LOC69…			3	main
306	17612878					0.114439	up	0.568369	6.47425	6.35982	6.17002	6.21198	6.69745	6.59569	6.48391	6.34316													chrUn	0	283					3	main
307	17612880	hippocampus abundant transcript 1	Hiat1	BC160912	Rn.128804	-0.0312271	down	0.640188	7.49622	7.52745	7.42934	7.52143	7.63157	7.48194	7.47062	7.5361	100134827	NM_001106467///XM_006233223///XM_008761473///XM_008775254///XM_006233224	B1H293; A0A0G2KB40	NM_001106467; BC160912; ENSRNOT00000075340; ENSRNOT00000088123	brain| dorsal root ganglion| embryonic tissue| kidney| lung| ovary| pancreas| pituitary gland| testis| metamorphosing embryo| juvenile| adult	GO:0055085	transmembrane transport	GO:0016021; GO:0016020; GO:0005886	integral component of membrane; membrane; plasma membrane	GO:0005215; GO:0022891	transporter activity; substrate-specific transmembrane transporter activity		chr1	71185658	71216781	RefSeq; GenBank; ENSEMBL	Rattus norvegicus hippocampus abundant transcript 1 (Hiat1), mRNA.; Rattus norvegicus hippocampus abundant gene transcript 1, mRNA (cDNA clone MGC:188651 IMAGE:7456962), complete cds.; PREDICTED: Rattus norvegicus hippocampus abundant transcript 1 (Hiat1), transcript variant X2, mRNA.; PREDICTED: Rattus norvegicus hippocampus abundant transcript 1 (Hiat1), transcript variant X1, mRNA.; hippocampu…	ENSRNOT00000020907; ENSRNOT00000075340; ENSRNOT00000088123	Pfam	3	main
308	17612883	zinc finger protein 773 [Source:MGI Symbol;Acc:MGI:1923623]	Zfp773			0.0868617	up	0.676107	5.84941	5.76255	5.94702	5.37946	5.96116	5.80455	5.88659	5.85708			M0R904			GO:0006355	regulation of transcription, DNA-templated	GO:0005622	intracellular	GO:0003676; GO:0046872	nucleic acid binding; metal ion binding		chr1	71238768	71243721	ENSEMBL	zinc finger protein 773 [gene_biotype:protein_coding transcript_biotype:protein_coding]	ENSRNOT00000072231	Pfam	1	main
309	17612888	zinc finger protein 772	Zfp772		Rn.25316	0.129317	up	0.192469	5.51027	5.38095	5.33695	5.30295	5.50295	5.51949	5.60025	5.41106	308320	NM_001107472	D4A7C1	NM_001107472; ENSRNOT00000042086	brain| dorsal root ganglion| liver| ovary| pancreas| pituitary gland| placenta| spleen| testis| metamorphosing embryo| juvenile| adult	GO:0006355	regulation of transcription, DNA-templated	GO:0005622	intracellular	GO:0003676; GO:0003700; GO:0046872	nucleic acid binding; transcription factor activity, sequence-specific DNA binding; metal ion binding		chr1	71250473	71256311	RefSeq; ENSEMBL; NONCODE	Rattus norvegicus zinc finger protein 772 (Zfp772), mRNA.; zinc finger protein 954 [gene_biotype:protein_coding transcript_biotype:protein_coding]; Non-coding transcript identified by NONCODE	ENSRNOT00000042086	Pfam	1	main
310	17612895	zinc finger protein 419-like	LOC102547412			0.056059	up	0.644665	4.26225	4.20619	4.27546	4.30548	4.03763	4.37551	4.2885	4.12273	102547412	XM_008758997///XM_008774403	A0A0G2JWY4			GO:0006355	regulation of transcription, DNA-templated	GO:0005622	intracellular	GO:0003676; GO:0046872	nucleic acid binding; metal ion binding		chr1	71263331	71276023	RefSeq; ENSEMBL	PREDICTED: Rattus norvegicus zinc finger protein 419-like (LOC102547412), mRNA.; ensembl:novel chromosome:Rnor_6.0:1:69866069:69879804:1 gene:ENSRNOG00000059513 gene_biotype:protein_coding transcript_biotype:protein_coding; cdna:genscan chromosome:Rnor_6.0:1:69853714:69941387:1 transcript_biotype:protein_coding	ENSRNOT00000083609	Pfam	1	main
311	17612905	paternally expressed 3	Peg3			0.113176	up	0.293637	11.3536	11.2404	11.2167	11.2576	11.2469	11.4608	11.4314	11.1686	103691034	NM_001304816///XR_590073///XR_598740	D4AB33			GO:0000122; GO:0010468	negative regulation of transcription from RNA polymerase II promoter; regulation of gene expression	GO:0005654	nucleoplasm	GO:0003676; GO:0046872	nucleic acid binding; metal ion binding		chr1	71603499	71630100	RefSeq; ENSEMBL; NONCODE	Rattus norvegicus paternally expressed 3 (Peg3), mRNA.; PREDICTED: Rattus norvegicus uncharacterized LOC103691034 (LOC103691034), ncRNA.; paternally expressed 3 [gene_biotype:protein_coding transcript_biotype:protein_coding]; cdna:genscan chromosome:Rnor_6.0:1:70169841:70233862:1 transcript_biotype:protein_coding; Non-coding transcript identified by NONCODE	ENSRNOT00000050180	Pfam	1	main
312	17612922	zinc finger, imprinted 1	Zim1		Rn.218660	0.262386	up	0.402733	7.2926	7.03022	7.04313	7.00975	7.03777	7.47264	7.66263	6.74255	308322	NM_001107473	A0A0G2KA26; D3ZYW5	NM_001107473; ENSRNOT00000020416; ENSRNOT00000087668		GO:0006355	regulation of transcription, DNA-templated	GO:0005622	intracellular	GO:0003676; GO:0046872	nucleic acid binding; metal ion binding		chr1	71637534	71659128	RefSeq; ENSEMBL; NONCODE	Rattus norvegicus zinc finger, imprinted 1 (Zim1), mRNA.; zinc finger, imprinted 1 [gene_biotype:protein_coding transcript_biotype:protein_coding]; cdna:genscan chromosome:Rnor_6.0:1:70253650:70455260:1 transcript_biotype:protein_coding; Non-coding transcript identified by NONCODE	ENSRNOT00000087668	Pfam	1	main
313	17612931	olfactory receptor 3	Olr3		Rn.142006	0.296117	up	0.190478	5.67698	5.38086	5.26026	5.25312	5.62921	5.92145	5.43222	5.67726	292559	NM_001000110	D3ZYT7	NM_001000110; ENSRNOT00000020448		GO:0007186; GO:0007608; GO:0050911; GO:0007165; GO:0050896	G-protein coupled receptor signaling pathway; sensory perception of smell; detection of chemical stimulus involved in sensory perception of smell; signal transduction; response to stimulus	GO:0005886; GO:0016021; GO:0016020	plasma membrane; integral component of membrane; membrane	GO:0004930; GO:0004984; GO:0004871	G-protein coupled receptor activity; olfactory receptor activity; signal transducer activity		chr1	71833479	71834432	RefSeq; ENSEMBL; NONCODE	Rattus norvegicus olfactory receptor 3 (Olr3), mRNA.; olfactory receptor 3 [gene_biotype:protein_coding transcript_biotype:protein_coding]; cdna:genscan chromosome:Rnor_6.0:1:70253650:70455260:1 transcript_biotype:protein_coding; Non-coding transcript identified by NONCODE			1	main
314	17612933	olfactory receptor 4	Olr4		Rn.142005; Rn.142004	-0.131025	down	0.468646	5.71494	5.84596	5.57108	6.1092	5.8576	5.75133	5.61289	5.78059	292560	NM_001000111	M0RD62	NM_001000111; ENSRNOT00000072272		GO:0007166; GO:0007186; GO:0050911; GO:0007165; GO:0007608; GO:0050896	cell surface receptor signaling pathway; G-protein coupled receptor signaling pathway; detection of chemical stimulus involved in sensory perception of smell; signal transduction; sensory perception of smell; response to stimulus	GO:0005887; GO:0016021; GO:0005886; GO:0016020	integral component of plasma membrane; integral component of membrane; plasma membrane; membrane	GO:0004930; GO:0004984; GO:0004871	G-protein coupled receptor activity; olfactory receptor activity; signal transducer activity		chr1	71850007	71850963	RefSeq; ENSEMBL; NONCODE	Rattus norvegicus olfactory receptor 4 (Olr4), mRNA.; olfactory receptor 4 [gene_biotype:protein_coding transcript_biotype:protein_coding]; cdna:genscan chromosome:Rnor_6.0:1:70253650:70455260:1 transcript_biotype:protein_coding; Non-coding transcript identified by NONCODE			1	main
315	17612935	olfactory receptor 5	Olr5		Rn.142004	0.0663403	up	0.580736	4.58213	4.51579	4.53017	4.58321	4.43398	4.70658	4.38093	4.65889	292561	NM_001000112		NM_001000112		GO:0007186; GO:0050911	G-protein coupled receptor signaling pathway; detection of chemical stimulus involved in sensory perception of smell	GO:0016021	integral component of membrane	GO:0004984	olfactory receptor activity		chrUn	0	960	RefSeq; ENSEMBL; NONCODE	Rattus norvegicus olfactory receptor 5 (Olr5), mRNA.; cdna:genscan chromosome:Rnor_6.0:1:70465283:70490262:1 transcript_biotype:protein_coding; Non-coding transcript identified by NONCODE			1	main
316	17612937	olfactory receptor 6	Olr6		Rn.142003	-0.046878	down	0.723024	5.28542	5.33229	5.41154	5.11732	5.46802	5.27119	5.19272	5.39234	365175	NM_001000539///XM_003748751	M0R4S8	NM_001000539; ENSRNOT00000072404		GO:0007166; GO:0007186; GO:0050911; GO:0007165; GO:0007608; GO:0050896	cell surface receptor signaling pathway; G-protein coupled receptor signaling pathway; detection of chemical stimulus involved in sensory perception of smell; signal transduction; sensory perception of smell; response to stimulus	GO:0005887; GO:0016021; GO:0005886; GO:0016020	integral component of plasma membrane; integral component of membrane; plasma membrane; membrane	GO:0004930; GO:0004984; GO:0004871	G-protein coupled receptor activity; olfactory receptor activity; signal transducer activity		chr1	71876765	71877721	RefSeq; ENSEMBL; NONCODE	Rattus norvegicus olfactory receptor 6 (Olr6), mRNA.; olfactory receptor 6 [gene_biotype:protein_coding transcript_biotype:protein_coding]; PREDICTED: Rattus norvegicus olfactory receptor 5-like (LOC100910456), partial mRNA.; cdna:genscan chromosome:Rnor_6.0:1:70465283:70490262:1 transcript_biotype:protein_coding; cdna:genscan chromosome:Rnor_6.0:1:71050570:71093395:1 transcript_biotype:protein_c…			1	main
317	17612939	zinc finger protein 583	Zfp583		Rn.130550	0.160512	up	0.384677	6.30395	6.14344	5.97042	6.07644	6.38344	6.22129	6.51888	6.17168	499068	NM_001134609///XM_006228197///XM_006228199	F1M0F0; F1LUJ5	NM_001134609; XM_006228197; XM_006228199; ENSRNOT00000039438; ENSRNOT00000067530	brain| fetus| juvenile	GO:0006355	regulation of transcription, DNA-templated	GO:0005654; GO:0005622	nucleoplasm; intracellular	GO:0000977; GO:0003700; GO:0046872; GO:0003676	RNA polymerase II regulatory region sequence-specific DNA binding; transcription factor activity, sequence-specific DNA binding; metal ion binding; nucleic acid binding		chr1	72637802	72656306	RefSeq; ENSEMBL; NONCODE	Rattus norvegicus zinc finger protein 583 (Zfp583), mRNA.; PREDICTED: Rattus norvegicus zinc finger protein 583 (Zfp583), transcript variant X1, mRNA.; PREDICTED: Rattus norvegicus zinc finger protein 583 (Zfp583), transcript variant X2, mRNA.; zinc finger protein 583 [gene_biotype:protein_coding transcript_biotype:protein_coding]; cdna:genscan chromosome:Rnor_6.0:1:71223109:71290901:1 transcript…	ENSRNOT00000039438	Pfam	1	main
318	17612948					-0.102239	down	0.713044	5.06749	5.16973	5.03163	5.38235	5.09521	4.73767	5.52316	4.94163													chr1	72778941	72779672					1	main
319	17612951	zinc finger protein 787	Zfp787		Rn.23427	0.0349167	up	0.365218	6.01128	5.97637	5.93338	5.95414	6.04158	5.99993	6.02785	6.00607	365176	NM_001108904///XM_006228193	D3ZDN6	NM_001108904; XM_006228193; ENSRNOT00000059069; ENSRNOT00000084899	dorsal root ganglion| eye| heart| nerve| ovary| placenta| prostate| fetus| adult					GO:0003676; GO:0046872	nucleic acid binding; metal ion binding		chr1	72827317	72840114	RefSeq; ENSEMBL; NONCODE	Rattus norvegicus zinc finger protein 787 (Zfp787), mRNA.; PREDICTED: Rattus norvegicus zinc finger protein 787 (Zfp787), transcript variant X1, mRNA.; zinc finger protein 787 [gene_biotype:protein_coding transcript_biotype:protein_coding]; cdna:genscan chromosome:Rnor_6.0:1:71445386:71451330:1 transcript_biotype:protein_coding; Non-coding transcript identified by NONCODE	ENSRNOT00000059069; ENSRNOT00000084899	Pfam	1	main
320	17612955	similar to oocyte specific homeobox 3	RGD1564651		Rn.201051	-0.0782735	down	0.588459	4.33172	4.41	4.22346	4.48134	4.52519	4.41905	4.14328	4.43284	292572	XM_002725524///XM_002728684		XM_002725524; XM_002728684	testis								chr1	73124756	73137644	RefSeq; ENSEMBL; NONCODE	PREDICTED: Rattus norvegicus similar to oocyte specific homeobox 3 (RGD1564651), mRNA.; similar to oocyte specific homeobox 3 [gene_biotype:pseudogene transcript_biotype:pseudogene]; cdna:genscan chromosome:Rnor_6.0:1:71711988:71752512:1 transcript_biotype:protein_coding; Non-coding transcript identified by NONCODE			1	main
321	17612959	similar to oocyte specific homeobox 3	LOC691325			0.348477	up	0.179343	5.95308	5.6046	5.76073	5.20102	5.85205	5.88158	6.08768	5.88998	691325	XM_001077719///XM_006223073	A0A0G2K8Z7					GO:0005634	nucleus	GO:0003677	DNA binding		chrUn	0	16355	RefSeq; ENSEMBL	PREDICTED: Rattus norvegicus similar to oocyte specific homeobox 3 (LOC691325), mRNA.; ensembl:novel chromosome:Rnor_6.0:1:71765944:71767411:1 gene:ENSRNOG00000060136 gene_biotype:protein_coding transcript_biotype:protein_coding; cdna:genscan chromosome:Rnor_6.0:1:71766025:71767468:1 transcript_biotype:protein_coding	ENSRNOT00000091103	Pfam	3	main
322	17612966	oocyte specific homeobox 2	Obox2			0.104018	up	0.108173	4.79253	4.68852	4.68586	4.67675	4.70294	4.89192	4.73595	4.74974	292574	XM_008774426				GO:0006355	regulation of transcription, DNA-templated	GO:0005634	nucleus	GO:0043565	sequence-specific DNA binding		chrUn	0	1511	RefSeq	PREDICTED: Rattus norvegicus oocyte specific homeobox 2 (Obox2), transcript variant X1, mRNA.			3	main
323	17612970	vomeronasal 1 receptor 32	Vom1r32	AY510337	Rn.129432	0.166026	up	0.406154	3.96778	3.80175	3.76202	3.89019	3.75305	3.92382	4.28773	3.69178	494284	NM_001008937	Q5J3H3	NM_001008937; ENSRNOT00000044754; AY510337		GO:0007186	G-protein coupled receptor signaling pathway	GO:0016021; GO:0016020	integral component of membrane; membrane	GO:0016503	pheromone receptor activity		chr1	73231686	73232603	RefSeq; ENSEMBL; GenBank; NONCODE	Rattus norvegicus vomeronasal 1 receptor 32 (Vom1r32), mRNA.; vomeronasal 1 receptor 32 [gene_biotype:protein_coding transcript_biotype:protein_coding]; Rattus norvegicus vomeronasal V1r-type receptor V1rd24 mRNA, complete cds.; Non-coding transcript identified by NONCODE	ENSRNOT00000044754	Pfam	1	main
324	17612972					0.0528824	up	0.84573	5.01239	4.95951	4.82693	4.94316	5.10843	5.48267	4.68288	4.87162													chr1	73299351	73299467	ENSEMBL	5S ribosomal RNA [gene_biotype:rRNA transcript_biotype:rRNA]			3	main
325	17612974	vomeronasal 1 receptor 37	Vom1r37	AY510333	Rn.129428	-0.12512	down	0.353614	4.5222	4.64732	4.66602	4.48609	4.78986	4.3629	4.58278	4.62092	494272	NM_001008923	Q5J3H7	NM_001008923; ENSRNOT00000058999; AY510333		GO:0007186	G-protein coupled receptor signaling pathway	GO:0016021; GO:0016020	integral component of membrane; membrane	GO:0016503	pheromone receptor activity		chr1	76325234	76326196	RefSeq; ENSEMBL; GenBank; NONCODE	Rattus norvegicus vomeronasal 1 receptor 37 (Vom1r37), mRNA.; vomeronasal 1 receptor 37 [gene_biotype:protein_coding transcript_biotype:protein_coding]; Rattus norvegicus vomeronasal V1r-type receptor V1rd6 mRNA, complete cds.; cdna:genscan chromosome:Rnor_6.0:1:72210346:72260466:1 transcript_biotype:protein_coding; Non-coding transcript identified by NONCODE	ENSRNOT00000058999	Pfam	1	main
326	17612976					-0.278443	down	0.0347933	2.62598	2.90442	2.8627	2.77913	3.07143	2.62808	2.65487	2.59497													chr1	76322733	76322907	ENSEMBL	Nuclear RNase P [gene_biotype:ribozyme transcript_biotype:ribozyme]			1	main
327	17612978	vomeronasal 1 receptor 38	Vom1r38	AY510334	Rn.129427	0.0928633	up	0.543066	3.41673	3.32387	3.14171	3.53929	3.29062	3.56133	3.29279	3.39608	494307	NM_001008964	Q5J3H6	NM_001008964; ENSRNOT00000058997; AY510334		GO:0007186	G-protein coupled receptor signaling pathway	GO:0016021; GO:0016020	integral component of membrane; membrane	GO:0016503	pheromone receptor activity		chr1	76305194	76306117	RefSeq; ENSEMBL; GenBank; NONCODE	Rattus norvegicus vomeronasal 1 receptor 38 (Vom1r38), mRNA.; vomeronasal 1 receptor 38 [gene_biotype:protein_coding transcript_biotype:protein_coding]; Rattus norvegicus vomeronasal V1r-type receptor V1rd25 mRNA, complete cds.; Non-coding transcript identified by NONCODE	ENSRNOT00000058997	Pfam	1	main
328	17612980					-0.0500017	down	0.714145	3.56753	3.61753	3.57335	3.70931	3.56994	3.58135	3.76561	3.35563													chr1	76283751	76290811	ENSEMBL	cdna:genscan chromosome:Rnor_6.0:1:72210346:72260466:1 transcript_biotype:protein_coding			1	main
329	17612989					-0.181176	down	0.177018	6.01421	6.19539	6.18542	6.31048	6.09027	5.86568	6.17799	5.99897													chr1	76275385	76276259	ENSEMBL	cdna:genscan chromosome:Rnor_6.0:1:72210346:72260466:1 transcript_biotype:protein_coding			1	main
330	17612992	RAS-like, family 2, locus 9	Rasl2-9	AF507943	Rn.201649	-0.0243211	down	0.871299	5.36203	5.38635	5.63718	5.36693	5.15493	5.33242	5.35589	5.39777	751812	NM_001166675	Q8K586	NM_001166675; ENSRNOT00000050233; AF507943	liver	GO:0000054; GO:0006606; GO:0007264; GO:0006810; GO:0006886; GO:0006913; GO:0007165; GO:0008152; GO:0015031	ribosomal subunit export from nucleus; protein import into nucleus; small GTPase mediated signal transduction; transport; intracellular protein transport; nucleocytoplasmic transport; signal transduction; metabolic process; protein transport	GO:0005634; GO:0005737	nucleus; cytoplasm	GO:0003924; GO:0005525; GO:0000166	GTPase activity; GTP binding; nucleotide binding		chr1	76263179	76264357	RefSeq; ENSEMBL; GenBank	Rattus norvegicus RAS-like, family 2, locus 9 (Rasl2-9), mRNA.; RAS-like, family 2, locus 9 [gene_biotype:protein_coding transcript_biotype:protein_coding]; Rattus norvegicus GTP-ase Ran mRNA, complete cds.; cdna:genscan chromosome:Rnor_6.0:1:72272190:72286260:1 transcript_biotype:protein_coding	ENSRNOT00000050233	Pfam	1	main
331	17612996	ret finger protein-like 4A	Rfpl4a		Rn.218637	-0.0176029	down	0.93696	5.04119	5.0588	4.88132	5.17591	5.11916	5.19916	4.66549	5.25894	292583	NM_001106222	D4ABM4	NM_001106222; ENSRNOT00000021077				GO:0005634; GO:0005730; GO:0005737	nucleus; nucleolus; cytoplasm	GO:0008270; GO:0046872; GO:0005515	zinc ion binding; metal ion binding; protein binding		chr1	76249813	76256272	RefSeq; ENSEMBL; NONCODE	Rattus norvegicus ret finger protein-like 4A (Rfpl4a), mRNA.; ret finger protein-like 4A [gene_biotype:protein_coding transcript_biotype:protein_coding]; cdna:genscan chromosome:Rnor_6.0:1:72272190:72286260:1 transcript_biotype:protein_coding; Non-coding transcript identified by NONCODE	ENSRNOT00000021077	Pfam	1	main
332	17613001	zinc finger protein 865	Zfp865		Rn.198482	-0.16468	down	0.422976	6.1609	6.32558	6.21511	6.40078	6.36083	6.38635	6.28197	5.81437	308337	NM_001134544	D4A0V8	NM_001134544; ENSRNOT00000021917	dorsal root ganglion| heart| liver| placenta| adult	GO:0002244	hematopoietic progenitor cell differentiation			GO:0003676; GO:0046872	nucleic acid binding; metal ion binding		chr1	76174718	76179196	RefSeq; ENSEMBL; NONCODE	Rattus norvegicus zinc finger protein 865 (Zfp865), mRNA.; zinc finger protein 865 [gene_biotype:protein_coding transcript_biotype:protein_coding]; cdna:genscan chromosome:Rnor_6.0:1:72356913:72360002:1 transcript_biotype:protein_coding; Non-coding transcript identified by NONCODE			1	main							o
333	17613006	FLT3-interacting zinc finger 1	Fiz1	FQ224110	Rn.18880	0.0348034	up	0.747568	6.83763	6.80283	6.84125	6.83908	6.72817	6.79079	6.70381	7.0183	292584	NM_001106223///XM_006228252///XM_006228253///XM_006228254	D3ZP93	NM_001106223; XM_006228252; XM_006228253; XM_006228254; ENSRNOT00000022236; FQ224110	adipose tissue| adrenal gland| brain| dorsal root ganglion| eye| kidney| pancreas| small intestine| metamorphosing embryo| adult	GO:0001934	positive regulation of protein phosphorylation	GO:0005634; GO:0005737	nucleus; cytoplasm	GO:0003676; GO:0030971; GO:0046872; GO:0005515	nucleic acid binding; receptor tyrosine kinase binding; metal ion binding; protein binding		chr1	76148776	76155290	RefSeq; ENSEMBL; GenBank; NONCODE	Rattus norvegicus FLT3-interacting zinc finger 1 (Fiz1), mRNA.; PREDICTED: Rattus norvegicus FLT3-interacting zinc finger 1 (Fiz1), transcript variant X1, mRNA.; PREDICTED: Rattus norvegicus FLT3-interacting zinc finger 1 (Fiz1), transcript variant X2, mRNA.; PREDICTED: Rattus norvegicus FLT3-interacting zinc finger 1 (Fiz1), transcript variant X3, mRNA.; FLT3-interacting zinc finger 1 [gene_biot…	ENSRNOT00000022236	Pfam	1	main
334	17613011	zinc finger protein 579	Zfp579	BC161912	Rn.20534	-0.0458256	down	0.58685	6.65313	6.69896	6.62838	6.73233	6.73617	6.68956	6.75049	6.51935	308339	NM_001126276///XM_006228256	B1WBW3	NM_001126276; XM_006228256; ENSRNOT00000022349; BC161912	connective tissue| kidney| ovary| pituitary gland| thymus| metamorphosing embryo| juvenile| adult					GO:0044822; GO:0046872; GO:0003676	poly(A) RNA binding; metal ion binding; nucleic acid binding		chr1	76133747	76136919	RefSeq; ENSEMBL; GenBank; NONCODE	Rattus norvegicus zinc finger protein 579 (Zfp579), mRNA.; PREDICTED: Rattus norvegicus zinc finger protein 579 (Zfp579), transcript variant X1, mRNA.; zinc finger protein 579 [gene_biotype:protein_coding transcript_biotype:protein_coding]; Rattus norvegicus zinc finger protein 579, mRNA (cDNA clone MGC:187645 IMAGE:8369301), complete cds.; cdna:genscan chromosome:Rnor_6.0:1:72394287:72401960:1 t…	ENSRNOT00000022349	Pfam	1	main
335	17613015	SH3 domain binding kinase family, member 3	Sbk3			-0.0333816	down	0.830145	6.05952	6.0929	5.95648	6.11843	6.20381	6.25213	5.82117	6.10527	691408	XM_001078116///XM_002725520	D3ZNQ2			GO:0006468	protein phosphorylation			GO:0004674; GO:0005524; GO:0000166; GO:0004672	protein serine/threonine kinase activity; ATP binding; nucleotide binding; protein kinase activity		chr1	76113102	76116262	RefSeq; ENSEMBL	PREDICTED: Rattus norvegicus SH3 domain binding kinase family, member 3 (Sbk3), mRNA.; SH3 domain binding kinase family, member 3 [gene_biotype:protein_coding transcript_biotype:protein_coding]; cdna:genscan chromosome:Rnor_6.0:1:72412372:72443653:1 transcript_biotype:protein_coding	ENSRNOT00000066307	Pfam	1	main
336	17613020	SH3 domain binding kinase family, member 2	Sbk2	BC161893	Rn.201731	-0.00674027	down	0.951814	5.62155	5.62829	5.58911	5.73077	5.56497	5.72093	5.70425	5.43945	691411	NM_001127539	B1WBU5	NM_001127539; ENSRNOT00000058956; BC161893	brain| heart| muscle	GO:0000165; GO:0000187; GO:0007346; GO:0023014; GO:0031098; GO:0042981; GO:0006468; GO:0016310; GO:0035556	MAPK cascade; activation of MAPK activity; regulation of mitotic cell cycle; signal transduction by protein phosphorylation; stress-activated protein kinase signaling cascade; regulation of apoptotic process; protein phosphorylation; phosphorylation; intracellular signal transduction	GO:0005737	cytoplasm	GO:0004674; GO:0004708; GO:0005524; GO:0000166; GO:0004672; GO:0016301; GO:0016740; GO:0004702	protein serine/threonine kinase activity; MAP kinase kinase activity; ATP binding; nucleotide binding; protein kinase activity; kinase activity; transferase activity; receptor signaling protein serine/threonine kinase activity		chr1	76102582	76110348	RefSeq; ENSEMBL; GenBank; NONCODE	Rattus norvegicus SH3 domain binding kinase family, member 2 (Sbk2), mRNA.; SH3 domain binding kinase family, member 2 [gene_biotype:protein_coding transcript_biotype:protein_coding]; Rattus norvegicus similar to protein kinase Bsk146, mRNA (cDNA clone MGC:187475 IMAGE:7193319), complete cds.; cdna:genscan chromosome:Rnor_6.0:1:72412372:72443653:1 transcript_biotype:protein_coding; Non-coding tra…	ENSRNOT00000058956	Pfam	1	main
337	17613026	isochorismatase domain containing 2b	Isoc2b	BC085336	Rn.1804	-0.137239	down	0.338984	6.32307	6.46031	6.51912	6.4624	6.3994	6.53102	6.1096	6.32859	361501	NM_001008367///XM_006228274	Q5U3Z3	NM_001008367; XM_006228274; ENSRNOT00000022620; BC085336	adipose tissue| brain| connective tissue| dorsal root ganglion| eye| heart| kidney| lung| ovary| pituitary gland| prostate| small intestine| spleen| thymus| juvenile| adult	GO:0031648; GO:0008152	protein destabilization; metabolic process	GO:0005634; GO:0005737; GO:0005739	nucleus; cytoplasm; mitochondrion	GO:0003824	catalytic activity		chr1	75991119	76011768	RefSeq; ENSEMBL; GenBank; NONCODE	Rattus norvegicus isochorismatase domain containing 2b (Isoc2b), mRNA.; PREDICTED: Rattus norvegicus isochorismatase domain containing 2b (Isoc2b), transcript variant X1, mRNA.; isochorismatase domain containing 2b [gene_biotype:protein_coding transcript_biotype:protein_coding]; Rattus norvegicus isochorismatase domain containing 2b, mRNA (cDNA clone MGC:105521 IMAGE:7301753), complete cds.; cdna…	ENSRNOT00000022620	Pfam	1	main
338	17613034	shisa family member 7	Shisa7		Rn.50094	0.124707	up	0.47566	6.60413	6.47942	6.60185	6.36677	6.46964	6.75535	6.73928	6.31775	691429	NM_001145175///XM_006228290	D3ZPJ0	NM_001145175; XM_006228290; ENSRNOT00000022698	brain| adult	GO:0048172	regulation of short-term neuronal synaptic plasticity	GO:0032281; GO:0045202	AMPA glutamate receptor complex; synapse				chr1	75971936	75990853	RefSeq; ENSEMBL	Rattus norvegicus shisa family member 7 (Shisa7), mRNA.; PREDICTED: Rattus norvegicus shisa family member 7 (Shisa7), transcript variant X1, mRNA.; shisa family member 7 [gene_biotype:protein_coding transcript_biotype:protein_coding]; cdna:genscan chromosome:Rnor_6.0:1:72553322:72560348:1 transcript_biotype:protein_coding	ENSRNOT00000022698	Pfam	1	main
339	17613043	ubiquitin-conjugating enzyme E2S	Ube2s	BC169077|FQ232915	Rn.120398	-0.00652217	down	0.872305	8.14174	8.14826	8.1669	8.0896	8.18828	8.1666	8.0948	8.16381	292588	NM_001106224///XR_593654	B5DFI8	NM_001106224; ENSRNOT00000022977; BC169077; FQ232915	adrenal gland| brain| connective tissue| embryonic tissue| eye| heart| kidney| liver| ovary| pancreas| pituitary gland| placenta| prostate| spleen| testis| metamorphosing embryo| fetus| juvenile| adult	GO:0000209; GO:0006511; GO:0010458; GO:0010994; GO:0031145; GO:0035519; GO:0044314; GO:0051301; GO:0051488; GO:0070534; GO:0070979; GO:0085020; GO:0007049; GO:0016567	protein polyubiquitination; ubiquitin-dependent protein catabolic process; exit from mitosis; free ubiquitin chain polymerization; anaphase-promoting complex-dependent proteasomal ubiquitin-dependent protein catabolic process; protein K29-linked ubiquitination; protein K27-linked ubiquitination; cell division; activation of anaphase-promoting complex activity; protein K63-linked ubiquitination; p…	GO:0005680; GO:0005737; GO:0005634	anaphase-promoting complex; cytoplasm; nucleus	GO:0004842; GO:0005524; GO:0031625; GO:0061630; GO:0061631; GO:0000166; GO:0016740; GO:0016874; GO:0019787	ubiquitin-protein transferase activity; ATP binding; ubiquitin protein ligase binding; ubiquitin protein ligase activity; ubiquitin conjugating enzyme activity; nucleotide binding; transferase activity; ligase activity; ubiquitin-like protein transferase activity		chr1	75951965	75956025	RefSeq; ENSEMBL; GenBank; NONCODE	Rattus norvegicus ubiquitin-conjugating enzyme E2S (Ube2s), mRNA.; ubiquitin-conjugating enzyme E2S [gene_biotype:protein_coding transcript_biotype:protein_coding]; Rattus norvegicus ubiquitin-conjugating enzyme E2S, mRNA (cDNA clone MGC:189478 IMAGE:5620985), complete cds.; PREDICTED: Rattus norvegicus ubiquitin-conjugating enzyme E2 S-like (LOC103692946), misc_RNA.; cdna:genscan chromosome:Rnor…	ENSRNOT00000022977	Pfam	1	main					o			o				o
340	17613048	transmembrane protein 238	Tmem238			0.0260426	up	0.834926	7.73295	7.70691	7.56501	7.85418	7.70153	7.85908	7.57882	7.76095	499072	XM_001071740///XM_574354											chr1	75905169	75910073	RefSeq; ENSEMBL; NONCODE	PREDICTED: Rattus norvegicus transmembrane protein 238 (Tmem238), mRNA.; transmembrane protein 238 [gene_biotype:pseudogene transcript_biotype:pseudogene]; cdna:genscan chromosome:Rnor_6.0:1:72624705:72625232:1 transcript_biotype:protein_coding; Non-coding transcript identified by NONCODE			1	main
341	17613051	interleukin 11	Il11	AF347935	Rn.198483	-0.116319	down	0.0445503	4.64157	4.75789	4.73014	4.81402	4.72949	4.61385	4.61162	4.69923	171040	NM_133519	G3V890	NM_133519; ENSRNOT00000023489; ENSRNOT00000090636	connective tissue| pancreas| adult	GO:0008284; GO:0033138; GO:0043410; GO:0045944; GO:0046888; GO:0050731; GO:1903659; GO:2000352	positive regulation of cell proliferation; positive regulation of peptidyl-serine phosphorylation; positive regulation of MAPK cascade; positive regulation of transcription from RNA polymerase II promoter; negative regulation of hormone secretion; positive regulation of peptidyl-tyrosine phosphorylation; regulation of complement-dependent cytotoxicity; negative regulation of endothelial cell apop…	GO:0005615; GO:0005737	extracellular space; cytoplasm	GO:0005125; GO:0005142; GO:0008083; GO:0005515	cytokine activity; interleukin-11 receptor binding; growth factor activity; protein binding		chr1	75891523	75899511	RefSeq; ENSEMBL; GenBank; NONCODE	Rattus norvegicus interleukin 11 (Il11), mRNA.; interleukin 11 [gene_biotype:protein_coding transcript_biotype:protein_coding]; Rattus norvegicus interleukin 11 precursor, mRNA, complete cds.; Non-coding transcript identified by NONCODE	ENSRNOT00000023489; ENSRNOT00000090636	Pfam	1	main
342	17613057	family with sequence similarity 71, member E2	Fam71e2	BC161877	Rn.198484	0.0915423	up	0.615601	5.26876	5.17721	5.24448	5.12526	5.1619	5.548	5.28035	4.97792	308344	NM_001145401///XM_008758921///XM_008758922	B1WBT2; F8WG83	NM_001145401; XM_008758921; XM_008758922; ENSRNOT00000048976; ENSRNOT00000065051; BC161877	testis| juvenile			GO:0005634	nucleus				chrUn	0	16671	RefSeq; ENSEMBL; GenBank; NONCODE	Rattus norvegicus family with sequence similarity 71, member E2 (Fam71e2), mRNA.; PREDICTED: Rattus norvegicus family with sequence similarity 71, member E2 (Fam71e2), transcript variant X1, mRNA.; PREDICTED: Rattus norvegicus family with sequence similarity 71, member E2 (Fam71e2), transcript variant X2, mRNA.; family with sequence similarity 71, member E2 [gene_biotype:protein_coding transcript…	ENSRNOT00000048976; ENSRNOT00000065051	Pfam	1	main
343	17613074	cytochrome c oxidase subunit VIb polypeptide 2	Cox6b2	AY152399|BC126062	Rn.97699	0.174883	up	0.112379	6.01583	5.84095	5.97554	5.78091	5.7664	6.12324	5.96406	5.96021	654441	NM_001039085///XM_008758979	Q6YFQ1	NM_001039085; XM_008758979; ENSRNOT00000033197; AY152399; BC126062	brain| kidney| nerve| spleen| testis| juvenile| adult	GO:1902600	hydrogen ion transmembrane transport	GO:0005739; GO:0030061	mitochondrion; mitochondrial crista	GO:0004129; GO:0005515	cytochrome-c oxidase activity; protein binding		chr1	75873171	75874396	RefSeq; ENSEMBL; GenBank; NONCODE	Rattus norvegicus cytochrome c oxidase subunit VIb polypeptide 2 (Cox6b2), mRNA.; PREDICTED: Rattus norvegicus cytochrome c oxidase subunit VIb polypeptide 2 (Cox6b2), transcript variant X1, mRNA.; cytochrome c oxidase subunit VIb polypeptide 2 [gene_biotype:protein_coding transcript_biotype:protein_coding]; Rattus norvegicus cytochrome c oxidase subunit VIb testes-specific isoform precursor, mRN…	ENSRNOT00000033197	Pfam	1	main
344	17613080	transmembrane protein 150B	Tmem150b	BC100103	Rn.198485	-0.0217929	down	0.881996	5.39865	5.42045	5.64131	5.31555	5.30447	5.54154	5.39813	5.25628	308346	NM_001107476///XM_006228267	D3ZEH7	NM_001107476; XM_006228267; ENSRNOT00000032439; BC100103	connective tissue| pancreas| spleen| adult	GO:0010506; GO:0030262	regulation of autophagy; apoptotic nuclear changes	GO:0005764; GO:0016021; GO:0016020	lysosome; integral component of membrane; membrane				chr1	75833875	75842776	RefSeq; ENSEMBL; GenBank; NONCODE	Rattus norvegicus transmembrane protein 150B (Tmem150b), mRNA.; PREDICTED: Rattus norvegicus transmembrane protein 150B (Tmem150b), transcript variant X1, mRNA.; transmembrane protein 150B [gene_biotype:protein_coding transcript_biotype:protein_coding]; Rattus norvegicus cDNA clone IMAGE:7377766.; cdna:genscan chromosome:Rnor_6.0:1:72693126:72701077:1 transcript_biotype:protein_coding; Non-coding…	ENSRNOT00000032439	Pfam	1	main	o
345	17613089	HSPA binding protein, cytoplasmic cochaperone 1	Hspbp1	AF187860|BC072541|FQ232199	Rn.4297	-0.201997	down	0.142899	8.44812	8.65012	8.7373	8.66212	8.55094	8.28005	8.44859	8.61572	246146	NM_139261///XM_006228248///XM_006228249///XM_006228250	Q6IMX7	NM_139261; XM_006228248; XM_006228249; XM_006228250; ENSRNOT00000024251; AF187860; BC072541; FQ232199	brain| colon| connective tissue| dorsal root ganglion| eye| heart| kidney| liver| lung| muscle| ovary| pituitary gland| placenta| prostate| small intestine| spleen| testis| thymus| metamorphosing embryo| fetus| juvenile| adult	GO:0006457; GO:0031398; GO:0032436; GO:0043086	protein folding; positive regulation of protein ubiquitination; positive regulation of proteasomal ubiquitin-dependent protein catabolic process; negative regulation of catalytic activity	GO:0005737	cytoplasm	GO:0000774; GO:0004857; GO:0005515	adenyl-nucleotide exchange factor activity; enzyme inhibitor activity; protein binding		chr1	75779792	75803080	RefSeq; ENSEMBL; GenBank; NONCODE	Rattus norvegicus HSPA binding protein, cytoplasmic cochaperone 1 (Hspbp1), mRNA.; PREDICTED: Rattus norvegicus HSPA binding protein, cytoplasmic cochaperone 1 (Hspbp1), transcript variant X1, mRNA.; PREDICTED: Rattus norvegicus HSPA binding protein, cytoplasmic cochaperone 1 (Hspbp1), transcript variant X2, mRNA.; PREDICTED: Rattus norvegicus HSPA binding protein, cytoplasmic cochaperone 1 (Hspb…			1	main
346	17613100	protein phosphatase 6, regulatory subunit 1	Ppp6r1		Rn.138371	-0.0123907	down	0.566772	8.744	8.75639	8.72644	8.783	8.75972	8.72437	8.74443	8.76319	361502	NM_001135849///XM_006228275///XM_006228276	D3ZG37; A0A0G2JTK4	NM_001135849; XM_006228275; XM_006228276; ENSRNOT00000024400; ENSRNOT00000082423	brain| connective tissue| dorsal root ganglion| embryonic tissue| eye| heart| kidney| liver| lung| ovary| pancreas| pituitary gland| placenta| prostate| spleen| testis| thymus|tailbud embryo| metamorphosing embryo| juvenile| adult	GO:0043666	regulation of phosphoprotein phosphatase activity	GO:0005737	cytoplasm	GO:0019903; GO:0005515	protein phosphatase binding; protein binding		chr1	75750747	75777985	RefSeq; ENSEMBL; NONCODE	Rattus norvegicus protein phosphatase 6, regulatory subunit 1 (Ppp6r1), mRNA.; PREDICTED: Rattus norvegicus protein phosphatase 6, regulatory subunit 1 (Ppp6r1), transcript variant X2, mRNA.; PREDICTED: Rattus norvegicus protein phosphatase 6, regulatory subunit 1 (Ppp6r1), transcript variant X1, mRNA.; protein phosphatase 6, regulatory subunit 1 [gene_biotype:protein_coding transcript_biotype:pr…	ENSRNOT00000024400; ENSRNOT00000082423	Pfam	1	main
347	17613125	transmembrane protein 86B	Tmem86b	BC158795	Rn.145534	0.0312444	up	0.900682	5.29927	5.26802	5.60747	5.22513	4.97147	5.20514	5.10835	5.58431	690610	NM_001109604///XM_006228289	B0BNF0; G3V9A6	NM_001109604; XM_006228289; ENSRNOT00000041527; ENSRNOT00000090065; BC158795	brain| prostate| thymus| juvenile| adult	GO:0046485	ether lipid metabolic process	GO:0005737; GO:0016020; GO:0016021; GO:0044444	cytoplasm; membrane; integral component of membrane; cytoplasmic part	GO:0047408; GO:0047409; GO:0016787; GO:0005515	alkenylglycerophosphocholine hydrolase activity; alkenylglycerophosphoethanolamine hydrolase activity; hydrolase activity; protein binding		chr1	75747872	75750238	RefSeq; ENSEMBL; GenBank; NONCODE	Rattus norvegicus transmembrane protein 86B (Tmem86b), mRNA.; PREDICTED: Rattus norvegicus transmembrane protein 86B (Tmem86b), transcript variant X1, mRNA.; transmembrane protein 86B [gene_biotype:protein_coding transcript_biotype:protein_coding]; Rattus norvegicus transmembrane protein 86B, mRNA (cDNA clone MGC:188180 IMAGE:7314455), complete cds.; cdna:genscan chromosome:Rnor_6.0:1:72732624:72…	ENSRNOT00000041527; ENSRNOT00000090065	Pfam	1	main
348	17613131	protein tyrosine phosphatase, receptor type, H	Ptprh	D45413	Rn.10285	0.0288091	up	0.835145	5.60991	5.5811	5.51081	5.67464	5.55786	5.67359	5.77892	5.37723	171125	NM_001191945///XM_008758887	Q64642; A0A0G2K754	NM_001191945; ENSRNOT00000092117; D45413	brain| colon| small intestine| fetus| adult	GO:0035335; GO:0006470; GO:0016311	peptidyl-tyrosine dephosphorylation; protein dephosphorylation; dephosphorylation	GO:0016021; GO:0016020	integral component of membrane; membrane	GO:0004725; GO:0004721; GO:0005001; GO:0016787; GO:0016791	protein tyrosine phosphatase activity; phosphoprotein phosphatase activity; transmembrane receptor protein tyrosine phosphatase activity; hydrolase activity; phosphatase activity		chrUn	0	43717	RefSeq; ENSEMBL; GenBank; NONCODE	Rattus norvegicus protein tyrosine phosphatase, receptor type, H (Ptprh), mRNA.; protein tyrosine phosphatase, receptor type, H [gene_biotype:protein_coding transcript_biotype:protein_coding]; Rattus norvegicus mRNA for brain-enriched membrane-associated protein tyrosine phosphatase (BEM)-2, complete cds.; cdna:genscan chromosome:Rnor_6.0:1:72732624:72899527:1 transcript_biotype:protein_coding; P…	ENSRNOT00000092117	Pfam	1	main
349	17613154	synaptotagmin V	Syt5	BC092198|U26402	Rn.11030	0.437742	up	0.101804	7.27428	6.83654	6.99093	6.70487	6.81382	7.47602	7.45095	6.89588	54309	NM_019350///XM_006228287	P47861	NM_019350; XM_006228287; ENSRNOT00000024547; BC092198; U26402	adrenal gland| brain| pancreas| juvenile| adult	GO:0016079; GO:0017156; GO:0017158; GO:0048488; GO:0048791; GO:0006906	synaptic vesicle exocytosis; calcium ion-dependent exocytosis; regulation of calcium ion-dependent exocytosis; synaptic vesicle endocytosis; calcium ion-dependent exocytosis of neurotransmitter; vesicle fusion	GO:0005886; GO:0016021; GO:0030054; GO:0030672; GO:0031045; GO:0043005; GO:0043025; GO:0048471; GO:0055038; GO:0005768; GO:0016020; GO:0031410; GO:0045202	plasma membrane; integral component of membrane; cell junction; synaptic vesicle membrane; dense core granule; neuron projection; neuronal cell body; perinuclear region of cytoplasm; recycling endosome membrane; endosome; membrane; cytoplasmic vesicle; synapse	GO:0005509; GO:0005544; GO:0019905; GO:0030276; GO:0046982; GO:0046872	calcium ion binding; calcium-dependent phospholipid binding; syntaxin binding; clathrin binding; protein heterodimerization activity; metal ion binding		chr1	75683290	75691002	RefSeq; ENSEMBL; GenBank; NONCODE	Rattus norvegicus synaptotagmin V (Syt5), mRNA.; PREDICTED: Rattus norvegicus synaptotagmin V (Syt5), transcript variant X1, mRNA.; synaptotagmin V [gene_biotype:protein_coding transcript_biotype:protein_coding]; Rattus norvegicus synaptotagmin V, mRNA (cDNA clone IMAGE:7313319), complete cds.; Rattus norvegicus synaptotagmin 5 mRNA, complete cds.; cdna:genscan chromosome:Rnor_6.0:1:72732624:7289…	ENSRNOT00000024547	Pfam	1	main
350	17613166	dynein, axonemal, assembly factor 3	Dnaaf3		Rn.8022	0.126091	up	0.225793	5.43325	5.30716	5.22085	5.33964	5.361	5.50973	5.28005	5.50999	100359753	NM_001271115///XM_008758882	D3ZCM9; A0A0G2K4H4	NM_001271115; XM_008758882; ENSRNOT00000058900; ENSRNOT00000077719	brain| lung| testis| juvenile| adult	GO:0007368; GO:0007507; GO:0044458; GO:0070286; GO:0030030	determination of left/right symmetry; heart development; motile cilium assembly; axonemal dynein complex assembly; cell projection organization	GO:0005737	cytoplasm				chr1	75669673	75677204	RefSeq; ENSEMBL; NONCODE	Rattus norvegicus dynein, axonemal, assembly factor 3 (Dnaaf3), mRNA.; PREDICTED: Rattus norvegicus dynein, axonemal, assembly factor 3 (Dnaaf3), transcript variant X1, mRNA.; dynein, axonemal, assembly factor 3 [gene_biotype:protein_coding transcript_biotype:protein_coding]; cdna:genscan chromosome:Rnor_6.0:1:72732624:72899527:1 transcript_biotype:protein_coding; Non-coding transcript identified…	ENSRNOT00000058900; ENSRNOT00000077719	Pfam	1	main
351	17613180	troponin I type 3 (cardiac); dynein, axonemal, assembly factor 3	Tnni3; Dnaaf3	DQ062462|M57679|M92074|X58499	Rn.64141; Rn.8022	0.0440352	up	0.676125	5.96077	5.91673	5.79246	6.10483	5.8529	5.91937	5.98519	5.97774	29248; 100359753	NM_017144	P23693; A0A0G2K4H4	NM_017144; ENSRNOT00000024640; ENSRNOT00000077719; DQ062462; M57679; M92074; X58499	embryonic tissue| heart| lung| ovary|tailbud embryo| juvenile| adult; brain| lung| testis| juvenile| adult	GO:0001570; GO:0001980; GO:0003009; GO:0006874; GO:0006937; GO:0006940; GO:0006941; GO:0007507; GO:0032780; GO:0055010; GO:0060047; GO:0060048; GO:0007368; GO:0044458; GO:0070286	vasculogenesis; regulation of systemic arterial blood pressure by ischemic conditions; skeletal muscle contraction; cellular calcium ion homeostasis; regulation of muscle contraction; regulation of smooth muscle contraction; striated muscle contraction; heart development; negative regulation of ATPase activity; ventricular cardiac muscle tissue morphogenesis; heart contraction; cardiac muscle con…	GO:0005737; GO:0005861; GO:0030016; GO:0030017; GO:0043292	cytoplasm; troponin complex; myofibril; sarcomere; contractile fiber	GO:0003779; GO:0005515; GO:0019855; GO:0019901; GO:0019904; GO:0030172; GO:0031014; GO:0046872; GO:0048306	actin binding; protein binding; calcium channel inhibitor activity; protein kinase binding; protein domain specific binding; troponin C binding; troponin T binding; metal ion binding; calcium-dependent protein binding	NM_017144 // GenMAPP // Striated_muscle_contraction///ENSRNOT00000024640 // GenMAPP // Striated_muscle_contraction///DQ062462 // GenMAPP // Striated_muscle_contraction///M57679 // GenMAPP // Striated_muscle_contraction///M92074 // GenMAPP // Striated_muscle_contraction///X58499 // GenMAPP // Striated_muscle_contraction	chr1	75665118	75668802	RefSeq; ENSEMBL; GenBank; NONCODE	Rattus norvegicus troponin I type 3 (cardiac) (Tnni3), mRNA.; troponin I type 3 (cardiac) [gene_biotype:protein_coding transcript_biotype:protein_coding]; dynein, axonemal, assembly factor 3 [gene_biotype:protein_coding transcript_biotype:protein_coding]; Rattus norvegicus troponin I mRNA, complete cds.; Rat cardiac troponin I mRNA, complete cds.; Rat troponin I mRNA, complete cds.; Rat cTNI mRNA…	ENSRNOT00000024640; ENSRNOT00000077719	Pfam	1	main							o					o
352	17613189	troponin T type 1 (skeletal, slow)	Tnnt1	AF399874|AY334079|AY334080|AY334081|AY334082|FQ215948	Rn.13846	0.44792	up	0.025676	5.33146	4.88354	4.91123	4.75869	4.98069	5.51147	5.12786	5.35504	171409	NM_001277260///NM_001277261///NM_001277262///NM_134388	Q7TNB2; Z4YP12	NM_001277260; NM_001277261; NM_001277262; NM_134388; ENSRNOT00000034957; ENSRNOT00000058843; AF399874; AY334079; AY334080; AY334081; AY334082; FQ215948	brain| embryonic tissue| muscle| metamorphosing embryo| adult	GO:0003009; GO:0006937; GO:0014883; GO:0031444; GO:0045932	skeletal muscle contraction; regulation of muscle contraction; transition between fast and slow fiber; slow-twitch skeletal muscle fiber contraction; negative regulation of muscle contraction	GO:0005861	troponin complex	GO:0005523; GO:0031014; GO:0005515	tropomyosin binding; troponin T binding; protein binding	NM_001277260 // GenMAPP // Striated_muscle_contraction///NM_001277261 // GenMAPP // Striated_muscle_contraction///NM_001277262 // GenMAPP // Striated_muscle_contraction///NM_134388 // GenMAPP // Striated_muscle_contraction///ENSRNOT00000034957 // GenMAPP // Striated_muscle_contraction///ENSRNOT00000058843 // GenMAPP // Striated_muscle_contraction///AF399874 // GenMAPP // Striated_muscle_contracti…	chr1	75652124	75660588	RefSeq; ENSEMBL; GenBank; NONCODE	Rattus norvegicus troponin T type 1 (skeletal, slow) (Tnnt1), transcript variant 2, mRNA.; Rattus norvegicus troponin T type 1 (skeletal, slow) (Tnnt1), transcript variant 3, mRNA.; Rattus norvegicus troponin T type 1 (skeletal, slow) (Tnnt1), transcript variant 4, mRNA.; Rattus norvegicus troponin T type 1 (skeletal, slow) (Tnnt1), transcript variant 1, mRNA.; troponin T type 1 (skeletal, slow) …	ENSRNOT00000034957; ENSRNOT00000058843	Pfam	1	main
353	17613199	protein phosphatase 1, regulatory subunit 12C	Ppp1r12c		Rn.41379	0.0695265	up	0.100757	7.87182	7.8023	7.76375	7.84867	7.79448	7.88572	7.82999	7.89977	499076	NM_001191946///XM_008758961	A0A0G2K4R1	NM_001191946; XM_008758961; ENSRNOT00000086122	brain| colon| connective tissue| dorsal root ganglion| embryonic tissue| eye| heart| liver| lung| ovary| pancreas| pituitary gland| placenta| prostate| spleen| testis| thymus|tailbud embryo| metamorphosing embryo| juvenile| adult					GO:0019901	protein kinase binding		chr1	75625470	75648494	RefSeq; ENSEMBL; NONCODE	Rattus norvegicus protein phosphatase 1, regulatory subunit 12C (Ppp1r12c), mRNA.; PREDICTED: Rattus norvegicus protein phosphatase 1, regulatory subunit 12C (Ppp1r12c), transcript variant X1, mRNA.; protein phosphatase 1, regulatory subunit 12C [gene_biotype:protein_coding transcript_biotype:protein_coding]; cdna:genscan chromosome:Rnor_6.0:1:72903257:72925553:1 transcript_biotype:protein_coding…	ENSRNOT00000086122	Pfam	1	main
354	17613223	retinol dehydrogenase 13 (all-trans/9-cis)	Rdh13		Rn.228894	0.063229	up	0.458357	6.91128	6.84805	6.82187	6.76995	6.95235	6.99429	6.93179	6.80777	361504	NM_001108468	D3ZFR9	NM_001108468; ENSRNOT00000031462	brain| nerve| pineal gland| placenta| prostate| spleen| juvenile| adult	GO:0009644; GO:0010842; GO:0042462; GO:0055114; GO:0008152	response to high light intensity; retina layer formation; eye photoreceptor cell development; oxidation-reduction process; metabolic process	GO:0005739	mitochondrion	GO:0016491	oxidoreductase activity		chr1	75563121	75590915	RefSeq; ENSEMBL; NONCODE	Rattus norvegicus retinol dehydrogenase 13 (all-trans/9-cis) (Rdh13), mRNA.; retinol dehydrogenase 13 (all-trans/9-cis) [gene_biotype:protein_coding transcript_biotype:protein_coding]; cdna:genscan chromosome:Rnor_6.0:1:72945424:73063129:1 transcript_biotype:protein_coding; Non-coding transcript identified by NONCODE	ENSRNOT00000031462	Pfam	1	main						o	o
355	17613233			AY510340		-0.0686117	down	0.187649	3.77249	3.8411	3.87987	3.76526	3.87818	3.78929	3.79694	3.73124		NM_001008942///NM_001167551											chr1	73342239	73343977	RefSeq; GenBank	Rattus norvegicus vomeronasal 1 receptor 33 (Vom1r33), mRNA.; Rattus norvegicus vomeronasal 1 receptor Vom1r39 (Vom1r39), mRNA.; Rattus norvegicus vomeronasal V1r-type receptor V1rd22 mRNA, complete cds.			3	main
356	17613237	NLR family, pyrin domain containing 9	Nlrp9		Rn.222429	0.0970539	up	0.534669	3.59908	3.50203	3.61394	3.62802	3.26412	3.75769	3.51605	3.5235	292577	NM_001169149///XM_006228188	D3ZAD9	NM_001169149; XM_006228188; ENSRNOT00000029591						GO:0005524; GO:0000166	ATP binding; nucleotide binding		chr1	73277596	73296648	RefSeq; ENSEMBL	Rattus norvegicus NLR family, pyrin domain containing 9 (Nlrp9), mRNA.; PREDICTED: Rattus norvegicus NLR family, pyrin domain containing 9 (Nlrp9), transcript variant X1, mRNA.; NLR family, pyrin domain containing 9 [gene_biotype:protein_coding transcript_biotype:protein_coding]; cdna:genscan chromosome:Rnor_6.0:1:71859390:71909138:-1 transcript_biotype:protein_coding	ENSRNOT00000029591	Pfam	3	main
357	17613244	CDC42 effector protein (Rho GTPase binding) 5	Cdc42ep5		Rn.198486	0.24814	up	0.0445524	4.57331	4.32517	4.4723	4.21776	4.28545	4.59631	4.49597	4.62765	361505	NM_001108469///XM_006228217///XM_008758944///XM_008758945	D3ZWQ6	NM_001108469; XM_006228217; XM_008758944; XM_008758945; ENSRNOT00000025110	connective tissue| heart| liver| muscle| prostate| small intestine| spleen| adult	GO:0007254; GO:0007266; GO:0008360; GO:0030838; GO:0031274; GO:0043547	JNK cascade; Rho protein signal transduction; regulation of cell shape; positive regulation of actin filament polymerization; positive regulation of pseudopodium assembly; positive regulation of GTPase activity	GO:0005737; GO:0005856; GO:0005886; GO:0016020	cytoplasm; cytoskeleton; plasma membrane; membrane	GO:0005096; GO:0017049; GO:0005515	GTPase activator activity; GTP-Rho binding; protein binding		chr1	74828607	74829131	RefSeq; ENSEMBL; NONCODE	Rattus norvegicus CDC42 effector protein (Rho GTPase binding) 5 (Cdc42ep5), mRNA.; PREDICTED: Rattus norvegicus CDC42 effector protein (Rho GTPase binding) 5 (Cdc42ep5), transcript variant X1, mRNA.; PREDICTED: Rattus norvegicus CDC42 effector protein (Rho GTPase binding) 5 (Cdc42ep5), transcript variant X2, mRNA.; PREDICTED: Rattus norvegicus CDC42 effector protein (Rho GTPase binding) 5 (Cdc42e…	ENSRNOT00000025110	Pfam	1	main
358	17613247	leukocyte receptor cluster (LRC) member 9	Leng9			-0.055991	down	0.552065	6.23041	6.2864	6.18344	6.3709	6.30485	6.22661	6.34771	6.1169	100912286	XM_006223039///XM_006228227	D3ZWP2			GO:0002230; GO:0098779; GO:0098792	positive regulation of defense response to virus by host; mitophagy in response to mitochondrial depolarization; xenophagy			GO:0046872	metal ion binding		chr1	74825505	74827022	RefSeq; ENSEMBL; NONCODE	PREDICTED: Rattus norvegicus leukocyte receptor cluster member 9-like (LOC100912286), mRNA.; leukocyte receptor cluster (LRC) member 9 [gene_biotype:protein_coding transcript_biotype:protein_coding]; cdna:genscan chromosome:Rnor_6.0:1:73694926:73722631:1 transcript_biotype:protein_coding; Non-coding transcript identified by NONCODE	ENSRNOT00000025138	Pfam	1	main
359	17613250	leukocyte-associated immunoglobulin-like receptor 1	Lair1	AY863023|DQ025756	Rn.149608	-0.151978	down	0.474091	6.49872	6.6507	6.91774	6.47034	6.56402	6.31033	6.763	6.42283	574531	NM_001029928///XM_008758974	P0C1X9	NM_001029928; XM_008758974; ENSRNOT00000036413; AY863023; DQ025756				GO:0005886; GO:0016021; GO:0070062; GO:0016020	plasma membrane; integral component of membrane; extracellular exosome; membrane				chrUn	0	30273	RefSeq; ENSEMBL; GenBank; NONCODE	Rattus norvegicus leukocyte-associated immunoglobulin-like receptor 1 (Lair1), mRNA.; PREDICTED: Rattus norvegicus leukocyte-associated immunoglobulin-like receptor 1 (Lair1), transcript variant X1, mRNA.; leukocyte-associated immunoglobulin-like receptor 1 [gene_biotype:protein_coding transcript_biotype:protein_coding]; Rattus norvegicus leukocyte-associated immunoglobulin-like receptor 1 (Lair1…			1	main
360	17613262	vomeronasal 2 receptor, 29	Vom2r29		Rn.217633	-0.0748356	down	0.544126	2.1128	2.18763	2.37887	2.08994	2.09408	2.23327	2.04945	2.05566	691560	NM_001099496	D3ZB66	NM_001099496; ENSRNOT00000040441		GO:0007186; GO:0007165	G-protein coupled receptor signaling pathway; signal transduction	GO:0005886; GO:0016021; GO:0016020	plasma membrane; integral component of membrane; membrane	GO:0004930; GO:0004871	G-protein coupled receptor activity; signal transducer activity		chr1	74285206	74306092	RefSeq; ENSEMBL; NONCODE	Rattus norvegicus vomeronasal 2 receptor, 29 (Vom2r29), mRNA.; vomeronasal 2 receptor, 29 [gene_biotype:protein_coding transcript_biotype:protein_coding]; cdna:genscan chromosome:Rnor_6.0:1:74271151:74272053:1 transcript_biotype:protein_coding; Non-coding transcript identified by NONCODE	ENSRNOT00000040441	Pfam	1	main
361	17613269					0.636939	up	0.260431	3.53137	2.89444	2.89055	3.07283	2.71993	4.48076	3.00867	3.10469													chrUn	0	148385	NONCODE	Non-coding transcript identified by NONCODE			1	main
362	17613275	vomeronasal 2 receptor, 30	Vom2r30		Rn.217650	-0.187418	down	0.00874053	2.50719	2.6946	2.65675	2.68025	2.74682	2.56114	2.46488	2.49554	289295	NM_001099467	F1LVC2	NM_001099467		GO:0007186; GO:0007165	G-protein coupled receptor signaling pathway; signal transduction	GO:0005886; GO:0016021; GO:0016020	plasma membrane; integral component of membrane; membrane	GO:0004930; GO:0004871	G-protein coupled receptor activity; signal transducer activity		chr1	73579664	74286110	RefSeq; ENSEMBL; NONCODE	Rattus norvegicus vomeronasal 2 receptor, 30 (Vom2r30), mRNA.; Uncharacterized protein [gene_biotype:protein_coding transcript_biotype:protein_coding]; cdna:genscan chromosome:Rnor_6.0:1:74778344:74791415:1 transcript_biotype:protein_coding; Non-coding transcript identified by NONCODE	ENSRNOT00000012225	Pfam	1	main
363	17613282	vomeronasal 2 receptor, 31	Vom2r31	AF016184	Rn.10812	-0.0649512	down	0.588667	4.10524	4.17019	4.2482	4.14048	4.12191	3.9546	4.0579	4.30323	286985	NM_173319	Q9QWK0; E9PT57; A0A0G2JVH8	NM_173319; ENSRNOT00000047147; ENSRNOT00000090708; AF016184		GO:0007186; GO:0007165	G-protein coupled receptor signaling pathway; signal transduction	GO:0005886; GO:0016021; GO:0016020	plasma membrane; integral component of membrane; membrane	GO:0004930; GO:0004871	G-protein coupled receptor activity; signal transducer activity		chr1	73554036	73579884	RefSeq; ENSEMBL; GenBank; NONCODE	Rattus norvegicus vomeronasal 2 receptor, 31 (Vom2r31), mRNA.; vomeronasal 2 receptor, 31 [gene_biotype:protein_coding transcript_biotype:protein_coding]; Rattus norvegicus putative pheromone receptor (Go-VN7) mRNA, complete cds.; cdna:genscan chromosome:Rnor_6.0:1:74978867:74999726:1 transcript_biotype:protein_coding; Non-coding transcript identified by NONCODE	ENSRNOT00000047147; ENSRNOT00000090708	Pfam	1	main
364	17613289					-0.108619	down	0.483124	2.56227	2.67089	2.7882	2.73179	2.49268	2.77752	2.45647	2.45282													chrUn	0	23893					1	main
365	17613293	vomeronasal 2 receptor, 32	Vom2r32	AF016179	Rn.10807	-0.419563	down	0.376228	2.1535	2.57306	2.30788	3.3765	2.0348	2.25052	1.95003	2.25995	286981	NM_173315///XM_008758879///XM_003748744	O35266; F7F1X2	NM_173315; XM_008758879; AF016179; ENSRNOT00000003545		GO:0007186; GO:0007165	G-protein coupled receptor signaling pathway; signal transduction	GO:0005886; GO:0016021; GO:0016020	plasma membrane; integral component of membrane; membrane	GO:0004930; GO:0004871	G-protein coupled receptor activity; signal transducer activity	NM_173315 // GenMAPP // GPCRDB_Class_C_Metabotropic_glutamate_pheromone///XM_008758879 // GenMAPP // GPCRDB_Class_C_Metabotropic_glutamate_pheromone///AF016179 // GenMAPP // GPCRDB_Class_C_Metabotropic_glutamate_pheromone///XM_003748744 // GenMAPP // GPCRDB_Class_C_Metabotropic_glutamate_pheromone///ENSRNOT00000003545 // GenMAPP // GPCRDB_Class_C_Metabotropic_glutamate_pheromone	chrUn	0	20474	RefSeq; GenBank; ENSEMBL; NONCODE	Rattus norvegicus vomeronasal 2 receptor, 32 (Vom2r32), mRNA.; PREDICTED: Rattus norvegicus vomeronasal 2 receptor, 32 (Vom2r32), transcript variant X1, mRNA.; Rattus norvegicus putative pheromone receptor (Go-VN2) mRNA, complete cds.; PREDICTED: Rattus norvegicus vomeronasal type-2 receptor 26-like (LOC100910563), mRNA.; vomeronasal type-2 receptor 26-like [gene_biotype:protein_coding transcript…	ENSRNOT00000003545	Pfam	1	main
366	17613302					-0.146438	down	0.457254	5.09012	5.23656	5.4779	5.0545	5.17728	4.84592	5.26732	5.15713													chr1	68110000	68110748					3	main
367	17613307	vomeronasal 1 receptor 42	Vom1r42	AY510306	Rn.215803	0.101826	up	0.55292	2.69762	2.59579	2.47409	2.81436	2.49893	2.92068	2.618	2.55418	494303	NM_001008959	Q5J3K4	NM_001008959; ENSRNOT00000041518; AY510306		GO:0007186	G-protein coupled receptor signaling pathway	GO:0016021; GO:0016020	integral component of membrane; membrane	GO:0016503	pheromone receptor activity		chr1	68081692	68082612	RefSeq; ENSEMBL; GenBank; NONCODE	Rattus norvegicus vomeronasal 1 receptor 42 (Vom1r42), mRNA.; vomeronasal 1 receptor 42 [gene_biotype:protein_coding transcript_biotype:protein_coding]; Rattus norvegicus vomeronasal V1r-type receptor V1rg16 mRNA, complete cds.; cdna:genscan chromosome:Rnor_6.0:1:67228675:67331298:-1 transcript_biotype:protein_coding; Non-coding transcript identified by NONCODE	ENSRNOT00000041518	Pfam	1	main
368	17613309	similar to zinc finger and SCAN domain containing 4	LOC691661			-0.0723004	down	0.735222	3.82785	3.90015	3.75047	4.16171	3.78826	4.03366	3.53571	3.91417	691661	XM_001079180///XM_002725499	A0A0G2K1K6			GO:0006351; GO:0006355	transcription, DNA-templated; regulation of transcription, DNA-templated	GO:0005634	nucleus	GO:0003676; GO:0003700; GO:0046872	nucleic acid binding; transcription factor activity, sequence-specific DNA binding; metal ion binding		chr1	68007849	68064575	RefSeq; ENSEMBL	PREDICTED: Rattus norvegicus similar to zinc finger and SCAN domain containing 4 (LOC691661), transcript variant X2, mRNA.; PREDICTED: Rattus norvegicus similar to zinc finger and SCAN domain containing 4 (LOC691661), transcript variant X1, mRNA.; ensembl:novel chromosome:Rnor_6.0:1:67274428:67284864:-1 gene:ENSRNOG00000059074 gene_biotype:protein_coding transcript_biotype:protein_coding; cdna:ge…	ENSRNOT00000082908	Pfam	1	main
369	17613316	vomeronasal 1 receptor 43	Vom1r43	AY510319	Rn.129424	-0.394824	down	0.0545726	3.2751	3.66993	3.55371	3.84487	3.61119	3.2961	3.0635	3.46571	494280	NM_001008932	Q5J3J1	NM_001008932; ENSRNOT00000048195; AY510319		GO:0007186	G-protein coupled receptor signaling pathway	GO:0016021; GO:0016020	integral component of membrane; membrane	GO:0016503	pheromone receptor activity		chr1	67984539	67985456	RefSeq; ENSEMBL; GenBank; NONCODE	Rattus norvegicus vomeronasal 1 receptor 43 (Vom1r43), mRNA.; vomeronasal 1 receptor 43 [gene_biotype:protein_coding transcript_biotype:protein_coding]; Rattus norvegicus vomeronasal V1r-type receptor V1rg17 mRNA, complete cds.; Non-coding transcript identified by NONCODE	ENSRNOT00000048195	Pfam	1	main
370	17613318	vomeronasal 1 receptor 44	Vom1r44	AY510307	Rn.129423	-0.0633367	down	0.654168	3.31476	3.3781	3.24067	3.62464	3.26897	3.23647	3.38773	3.32008	494254	NM_001008902///XM_008758769///XM_008758770	Q5J3K3	NM_001008902; XM_008758769; XM_008758770; ENSRNOT00000046788; AY510307		GO:0007186	G-protein coupled receptor signaling pathway	GO:0016021; GO:0016020	integral component of membrane; membrane	GO:0016503	pheromone receptor activity		chr1	67955362	67956366	RefSeq; ENSEMBL; GenBank; NONCODE	Rattus norvegicus vomeronasal 1 receptor 44 (Vom1r44), mRNA.; PREDICTED: Rattus norvegicus vomeronasal 1 receptor 44 (Vom1r44), transcript variant X1, mRNA.; PREDICTED: Rattus norvegicus vomeronasal 1 receptor 44 (Vom1r44), transcript variant X2, mRNA.; vomeronasal 1 receptor 44 [gene_biotype:protein_coding transcript_biotype:protein_coding]; Rattus norvegicus vomeronasal V1r-type receptor V1rg7 …	ENSRNOT00000046788	Pfam	1	main
371	17613320	vomeronasal 1 receptor 45	Vom1r45	AY510328	Rn.129422	-0.110024	down	0.42557	2.65253	2.76255	2.69197	2.68217	2.91352	2.76769	2.45647	2.73344	494287	NM_001008940	Q5J3I2	NM_001008940; ENSRNOT00000045214; AY510328		GO:0007186	G-protein coupled receptor signaling pathway	GO:0016021; GO:0016020	integral component of membrane; membrane	GO:0016503	pheromone receptor activity		chr1	67915183	67916130	RefSeq; ENSEMBL; GenBank; NONCODE	Rattus norvegicus vomeronasal 1 receptor 45 (Vom1r45), mRNA.; vomeronasal 1 receptor 45 [gene_biotype:protein_coding transcript_biotype:protein_coding]; Rattus norvegicus vomeronasal V1r-type receptor V1rg10 mRNA, complete cds.; Non-coding transcript identified by NONCODE	ENSRNOT00000045214	Pfam	1	main
372	17613322	vomeronasal 1 receptor 46	Vom1r46	AY510348	Rn.129421	-0.130196	down	0.0931658	3.84924	3.97944	3.97767	3.96372	3.99692	3.79813	3.7836	3.966	494286	NM_001008939	Q5J3G2	NM_001008939; ENSRNOT00000048152; AY510348		GO:0007186	G-protein coupled receptor signaling pathway	GO:0016021; GO:0016020	integral component of membrane; membrane	GO:0016503	pheromone receptor activity		chr1	67846749	67847699	RefSeq; ENSEMBL; GenBank; NONCODE	Rattus norvegicus vomeronasal 1 receptor 46 (Vom1r46), mRNA.; vomeronasal 1 receptor 46 [gene_biotype:protein_coding transcript_biotype:protein_coding]; Rattus norvegicus vomeronasal V1r-type receptor V1rg15 mRNA, complete cds.; Non-coding transcript identified by NONCODE	ENSRNOT00000048152	Pfam	1	main
373	17613324	vomeronasal 1 receptor 49	Vom1r49	AY510303	Rn.129418	-0.106908	down	0.491065	2.6973	2.8042	2.8241	2.91104	2.67747	2.46488	2.88663	2.74038	494269	NM_001008920	Q5J3K7; F7FHQ6; Q5J3J5; M0R7X0	NM_001008920; ENSRNOT00000045994; ENSRNOT00000072122; AY510303		GO:0007186	G-protein coupled receptor signaling pathway	GO:0016020; GO:0016021	membrane; integral component of membrane	GO:0016503	pheromone receptor activity		chr1	67745030	67751989	RefSeq; ENSEMBL; GenBank; NONCODE	Rattus norvegicus vomeronasal 1 receptor 49 (Vom1r49), mRNA.; vomeronasal 1 receptor 48 [gene_biotype:protein_coding transcript_biotype:protein_coding]; Rattus norvegicus vomeronasal V1r-type receptor V1rg8 mRNA, complete cds.; Non-coding transcript identified by NONCODE	ENSRNOT00000045994; ENSRNOT00000072122	Pfam	1	main
374	17613326	60S ribosomal protein L36a-like	LOC100911426			0.238523	up	0.0457825	7.24025	7.00173	7.11003	6.89858	6.99656	7.28093	7.12836	7.31146	100911426	XM_003750694///XM_001063928///XM_008758860	M0R7E5; D3ZDE0			GO:0006412	translation	GO:0005840; GO:0022625; GO:0005622	ribosome; cytosolic large ribosomal subunit; intracellular	GO:0003735	structural constituent of ribosome		chr1	67748455	67748768	RefSeq; ENSEMBL; NONCODE	PREDICTED: Rattus norvegicus 60S ribosomal protein L36a-like (LOC100911426), mRNA.; 60S ribosomal protein L36a-like [gene_biotype:protein_coding transcript_biotype:protein_coding]; similar to large subunit ribosomal protein L36a [gene_biotype:protein_coding transcript_biotype:protein_coding]; PREDICTED: Rattus norvegicus similar to large subunit ribosomal protein L36a (RGD1564617), mRNA.; cdna:ge…	ENSRNOT00000043603; ENSRNOT00000072809	Pfam	3	main
375	17613328	vomeronasal 1 receptor 51	Vom1r51	AY510370	Rn.129416	-0.110273	down	0.701698	2.88132	2.9916	2.55022	3.07497	3.3496	3.13831	2.72492	2.78074	494281	NM_001008933	Q5J3E0	NM_001008933; ENSRNOT00000029114; AY510370		GO:0007186	G-protein coupled receptor signaling pathway	GO:0016021; GO:0016020	integral component of membrane; membrane	GO:0016503	pheromone receptor activity		chr1	67661325	67662278	RefSeq; ENSEMBL; GenBank; NONCODE	Rattus norvegicus vomeronasal 1 receptor 51 (Vom1r51), mRNA.; vomeronasal 1 receptor 51 [gene_biotype:protein_coding transcript_biotype:protein_coding]; Rattus norvegicus vomeronasal V1r-type receptor V1rm5 mRNA, complete cds.; Non-coding transcript identified by NONCODE	ENSRNOT00000029114	Pfam	1	main
376	17613330	vomeronasal 1 receptor 52	Vom1r52	AY510373	Rn.129415	0.0297299	up	0.749828	5.16618	5.13645	5.05027	5.0884	5.27069	5.24448	5.06189	5.19218	494278	NM_001008930	Q5J3D7	NM_001008930; ENSRNOT00000039088; AY510373		GO:0007186	G-protein coupled receptor signaling pathway	GO:0016021; GO:0016020	integral component of membrane; membrane	GO:0016503	pheromone receptor activity		chr1	67574295	67575248	RefSeq; ENSEMBL; GenBank; NONCODE	Rattus norvegicus vomeronasal 1 receptor 52 (Vom1r52), mRNA.; vomeronasal 1 receptor, M6-like [gene_biotype:protein_coding transcript_biotype:protein_coding]; Rattus norvegicus vomeronasal V1r-type receptor V1rm6 mRNA, complete cds.; Non-coding transcript identified by NONCODE	ENSRNOT00000039088	Pfam	1	main
377	17613332	vomeronasal 1 receptor 53	Vom1r53	AY510369	Rn.129414; Rn.129413	0.0609638	up	0.630659	3.96372	3.90275	4.02327	3.79852	3.88646	4.10184	3.77577	4.01354	292607	NM_001008934///XR_590047	Q5J3E1; Q5J3D6	NM_001008934; AY510369; ENSRNOT00000038977		GO:0007186	G-protein coupled receptor signaling pathway	GO:0016021; GO:0016020	integral component of membrane; membrane	GO:0016503	pheromone receptor activity		chr1	67192425	67193378	RefSeq; GenBank; ENSEMBL	Rattus norvegicus vomeronasal 1 receptor 53 (Vom1r53), mRNA.; Rattus norvegicus vomeronasal V1r-type receptor V1rm3 mRNA, complete cds.; vomeronasal 1 receptor pseudogene 56 [gene_biotype:pseudogene transcript_biotype:pseudogene]; vomeronasal 1 receptor 53 [gene_biotype:protein_coding transcript_biotype:protein_coding]; PREDICTED: Rattus norvegicus vomeronasal 1 receptor pseudogene 56 (Vom1r-ps55…	ENSRNOT00000038977	Pfam	1	main
378	17613334					-0.125987	down	0.332405	4.54896	4.67494	4.68731	4.64386	4.69365	4.76366	4.37899	4.50422			M0R5A8			GO:0007186; GO:0007165	G-protein coupled receptor signaling pathway; signal transduction	GO:0005886; GO:0016021; GO:0016020	plasma membrane; integral component of membrane; membrane	GO:0004930; GO:0004871	G-protein coupled receptor activity; signal transducer activity		chr1	67071873	67072926	ENSEMBL	Uncharacterized protein [gene_biotype:protein_coding transcript_biotype:protein_coding]; cdna:genscan chromosome:Rnor_6.0:1:66275965:66366979:-1 transcript_biotype:protein_coding	ENSRNOT00000074234	Pfam	1	main
379	17613337	zinc finger protein 606	Zfp606		Rn.41659	-0.202431	down	0.343915	6.73487	6.93731	7.19933	6.80883	6.80376	6.49418	6.9645	6.74594	292610	XM_001063437///XM_006223000///XM_006223002///XM_006223003///XM_006228138///XM_006228139///XM_218283	P97654; G3V8H6; M0RCK8; A0A0G2K765	XM_001063437; XM_006223000; XM_006223002; XM_006223003; XM_006228138; XM_006228139; XM_218283; ENSRNOT00000025981; ENSRNOT00000073006; ENSRNOT00000079249	adult	GO:0006355	regulation of transcription, DNA-templated	GO:0005622; GO:0005654; GO:0005737	intracellular; nucleoplasm; cytoplasm	GO:0003676; GO:0003700; GO:0046872	nucleic acid binding; transcription factor activity, sequence-specific DNA binding; metal ion binding		chr1	67027200	67050976	RefSeq; ENSEMBL	PREDICTED: Rattus norvegicus zinc finger protein 606 (Zfp606), transcript variant X1, mRNA.; PREDICTED: Rattus norvegicus zinc finger protein 606 (Zfp606), transcript variant X2, mRNA.; PREDICTED: Rattus norvegicus zinc finger protein 606 (Zfp606), transcript variant X4, mRNA.; PREDICTED: Rattus norvegicus zinc finger protein 606 (Zfp606), transcript variant X3, mRNA.; PREDICTED: Rattus norvegicu…	ENSRNOT00000025981; ENSRNOT00000073006	Pfam	1	main
380	17613343	hypothetical protein LOC691722	LOC691722		Rn.156657	-0.115333	down	0.673107	4.03292	4.14825	3.84703	4.25102	4.34669	3.65352	4.34498	4.10024	691722	XM_006223004///XM_006223005///XM_006223007///XM_006228140///XM_006228141///XM_006228143	D4ADP8	XM_006223004; XM_006223005; XM_006223007; XM_006228140; XM_006228141; XM_006228143	placenta| testis| adult			GO:0016021; GO:0070062; GO:0016020	integral component of membrane; extracellular exosome; membrane				chr1	66985258	67008405	RefSeq; ENSEMBL; NONCODE	PREDICTED: Rattus norvegicus hypothetical protein LOC691722 (LOC691722), transcript variant X1, mRNA.; PREDICTED: Rattus norvegicus hypothetical protein LOC691722 (LOC691722), transcript variant X2, mRNA.; PREDICTED: Rattus norvegicus hypothetical protein LOC691722 (LOC691722), transcript variant X3, mRNA.; hypothetical protein LOC682846 [gene_biotype:protein_coding transcript_biotype:protein_cod…			1	main
381	17613350	zinc finger protein 110	Zfp110	BC097420	Rn.204252	-0.000112167	down	0.999216	7.42236	7.42248	7.53637	7.39491	7.33615	7.31671	7.35079	7.59959	308362	NM_001024775///XM_006228111///XM_006228112	Q4V8E9	NM_001024775; XM_006228111; XM_006228112; ENSRNOT00000026298; BC097420	brain| dorsal root ganglion| embryonic tissue| eye| heart| liver| lung| ovary| pituitary gland| placenta| prostate| small intestine| testis| thymus|tailbud embryo| metamorphosing embryo| juvenile| adult	GO:0006351; GO:0006357; GO:0006915; GO:0046328; GO:0051402; GO:0097191; GO:1990009; GO:0006355; GO:0006366	transcription, DNA-templated; regulation of transcription from RNA polymerase II promoter; apoptotic process; regulation of JNK cascade; neuron apoptotic process; extrinsic apoptotic signaling pathway; retinal cell apoptotic process; regulation of transcription, DNA-templated; transcription from RNA polymerase II promoter	GO:0005634; GO:0005654; GO:0005730; GO:0005737; GO:0005813; GO:0005622	nucleus; nucleoplasm; nucleolus; cytoplasm; centrosome; intracellular	GO:0000981; GO:0005166; GO:0043565; GO:0046872; GO:0003676; GO:0003677; GO:0003700; GO:0005515	RNA polymerase II transcription factor activity, sequence-specific DNA binding; neurotrophin p75 receptor binding; sequence-specific DNA binding; metal ion binding; nucleic acid binding; DNA binding; transcription factor activity, sequence-specific DNA binding; protein binding		chr1	66552906	66568139	RefSeq; ENSEMBL; GenBank; NONCODE	Rattus norvegicus zinc finger protein 110 (Zfp110), mRNA.; PREDICTED: Rattus norvegicus zinc finger protein 110 (Zfp110), transcript variant X1, mRNA.; PREDICTED: Rattus norvegicus zinc finger protein 110 (Zfp110), transcript variant X2, mRNA.; zinc finger protein 110 [gene_biotype:protein_coding transcript_biotype:protein_coding]; Rattus norvegicus zinc finger protein 110, mRNA (cDNA clone MGC:1…	ENSRNOT00000026298	Pfam	1	main	o
382	17613359	zinc finger protein 128	Zfp128			0.046115	up	0.351297	7.19001	7.14389	7.15176	7.10603	7.17389	7.26784	7.15191	7.15027	102553002	XM_006222989///XM_006228126	E9PT35			GO:0000122; GO:0030509	negative regulation of transcription from RNA polymerase II promoter; BMP signaling pathway	GO:0005634	nucleus	GO:0003676; GO:0046872; GO:0005515	nucleic acid binding; metal ion binding; protein binding		chr1	66504073	66516391	RefSeq; ENSEMBL; NONCODE	PREDICTED: Rattus norvegicus zinc finger protein 8-like (LOC102553002), mRNA.; zinc finger protein 8-like [gene_biotype:protein_coding transcript_biotype:protein_coding]; cdna:genscan chromosome:Rnor_6.0:1:65693365:65773630:-1 transcript_biotype:protein_coding; Non-coding transcript identified by NONCODE	ENSRNOT00000006118	Pfam	1	main
383	17613364	zinc finger protein 128	Zfp128			0.0197472	up	0.903136	5.88408	5.86433	6.02499	5.87937	5.68862	5.65314	5.96501	6.03407	102553002	XM_006222989///XM_006228126	D4ADL6			GO:0000122; GO:0030509; GO:0006351; GO:0006355	negative regulation of transcription from RNA polymerase II promoter; BMP signaling pathway; transcription, DNA-templated; regulation of transcription, DNA-templated	GO:0005634	nucleus	GO:0003676; GO:0046872; GO:0005515; GO:0003700; GO:0043565	nucleic acid binding; metal ion binding; protein binding; transcription factor activity, sequence-specific DNA binding; sequence-specific DNA binding		chr1	66488758	66492577	RefSeq; ENSEMBL; NONCODE	PREDICTED: Rattus norvegicus zinc finger protein 8-like (LOC102553002), mRNA.; zinc finger and SCAN domain containing 22 [gene_biotype:protein_coding transcript_biotype:protein_coding]; cdna:genscan chromosome:Rnor_6.0:1:65677621:65681440:-1 transcript_biotype:protein_coding; Non-coding transcript identified by NONCODE	ENSRNOT00000026305	Pfam	1	main
384	17613367	ribosomal protein S5	Rps5	BC158718|FQ221071|FQ223194|FQ226702	Rn.203028	0.184822	up	0.151706	8.80933	8.62451	8.50108	8.66161	8.71085	8.97227	8.75654	8.69919	25538	NM_001277243///NM_001277244	B0BN81; A0A0G2K200	NM_001277243; NM_001277244; ENSRNOT00000026528; ENSRNOT00000088367; BC158718; FQ221071; FQ223194; FQ226702	adrenal gland| brain| colon| connective tissue| dorsal root ganglion| embryonic tissue| eye| heart| kidney| liver| lung| muscle| nerve| ovary| pancreas| pituitary gland| placenta| prostate| small intestine| spleen| thymus| vibrissa| metamorphosing embryo| juvenile| adult	GO:0000028; GO:0006412; GO:0006450; GO:0008150	ribosomal small subunit assembly; translation; regulation of translational fidelity; biological_process	GO:0005925; GO:0016020; GO:0022627; GO:0030529; GO:0070062; GO:0005840; GO:0015935	focal adhesion; membrane; cytosolic small ribosomal subunit; ribonucleoprotein complex; extracellular exosome; ribosome; small ribosomal subunit	GO:0003729; GO:0003735; GO:0005515; GO:0019843; GO:0044822; GO:0003723; GO:0003674	mRNA binding; structural constituent of ribosome; protein binding; rRNA binding; poly(A) RNA binding; RNA binding; molecular_function		chr1	66471608	66475904	RefSeq; ENSEMBL; GenBank; NONCODE	Rattus norvegicus ribosomal protein S5 (Rps5), transcript variant 1, mRNA.; Rattus norvegicus ribosomal protein S5 (Rps5), transcript variant 2, mRNA.; ribosomal protein S5 [gene_biotype:protein_coding transcript_biotype:protein_coding]; Rattus norvegicus ribosomal protein S5, mRNA (cDNA clone MGC:187862 IMAGE:9089281), complete cds.; Rattus norvegicus TL0ADA40YA15 mRNA sequence.; Rattus norvegic…	ENSRNOT00000026528; ENSRNOT00000088367	Pfam	1	main
385	17613376	ring finger protein 225	Rnf225		Rn.225790	-0.15095	down	0.445888	5.00578	5.15673	5.24517	5.23801	4.98701	5.27428	4.72961	5.01345	502300	NM_001109334///XM_008758771	D3ZF25	NM_001109334; XM_008758771; ENSRNOT00000058574				GO:0016021; GO:0016020	integral component of membrane; membrane	GO:0008270; GO:0046872	zinc ion binding; metal ion binding		chr1	66468413	66471082	RefSeq; ENSEMBL; NONCODE	Rattus norvegicus ring finger protein 225 (Rnf225), mRNA.; PREDICTED: Rattus norvegicus similar to chromosome 6 open reading frame 148 (RGD1561909), transcript variant X1, mRNA.; ring finger protein 225 [gene_biotype:protein_coding transcript_biotype:protein_coding]; cdna:genscan chromosome:Rnor_6.0:1:65656921:65667304:-1 transcript_biotype:protein_coding; Non-coding transcript identified by NONC…	ENSRNOT00000058574	Pfam	1	main
386	17613380	myeloid zinc finger 1	Mzf1		Rn.205285	-0.0329361	down	0.722284	6.55985	6.59278	6.75742	6.46919	6.55173	6.54396	6.55563	6.57995	361508	NM_001108470///XM_006228116///XM_008758767///XM_008758768	D3ZF35	NM_001108470; XM_006228116; XM_008758767; XM_008758768; ENSRNOT00000058563	brain| heart| pancreas| adult	GO:0000122; GO:0006355; GO:0006366; GO:0045944; GO:0006351	negative regulation of transcription from RNA polymerase II promoter; regulation of transcription, DNA-templated; transcription from RNA polymerase II promoter; positive regulation of transcription from RNA polymerase II promoter; transcription, DNA-templated	GO:0005634	nucleus	GO:0000978; GO:0001077; GO:0001078; GO:0042803; GO:0044212; GO:0046872; GO:0003676; GO:0003700; GO:0005515	RNA polymerase II core promoter proximal region sequence-specific DNA binding; transcriptional activator activity, RNA polymerase II core promoter proximal region sequence-specific binding; transcriptional repressor activity, RNA polymerase II core promoter proximal region sequence-specific binding; protein homodimerization activity; transcription regulatory region DNA binding; metal ion binding;…		chr1	66333351	66344445	RefSeq; ENSEMBL; NONCODE	Rattus norvegicus myeloid zinc finger 1 (Mzf1), mRNA.; PREDICTED: Rattus norvegicus myeloid zinc finger 1 (Mzf1), transcript variant X1, mRNA.; PREDICTED: Rattus norvegicus myeloid zinc finger 1 (Mzf1), transcript variant X2, mRNA.; PREDICTED: Rattus norvegicus myeloid zinc finger 1 (Mzf1), transcript variant X3, mRNA.; myeloid zinc finger 1 [gene_biotype:protein_coding transcript_biotype:protein…	ENSRNOT00000058563	Pfam	1	main
387	17613388	ubiquitin-conjugating enzyme E2M	Ube2m		Rn.15135	0.00210967	up	0.973414	9.76613	9.76402	9.84076	9.76018	9.69112	9.74767	9.70643	9.84429	361509	NM_001108471	D3ZNQ6	NM_001108471; ENSRNOT00000031007	adrenal gland| brain| colon| connective tissue| embryonic tissue| eye| heart| liver| lung| pancreas| placenta| prostate| testis| thymus|tailbud embryo| metamorphosing embryo| fetus| juvenile| adult	GO:0006464; GO:0016567; GO:0043525; GO:0045116	cellular protein modification process; protein ubiquitination; positive regulation of neuron apoptotic process; protein neddylation	GO:0005737; GO:0070062; GO:0005575	cytoplasm; extracellular exosome; cellular_component	GO:0004842; GO:0005524; GO:0018169; GO:0019788; GO:0031625; GO:0061630; GO:0000166; GO:0003674; GO:0016874; GO:0005515	ubiquitin-protein transferase activity; ATP binding; ribosomal S6-glutamic acid ligase activity; NEDD8 transferase activity; ubiquitin protein ligase binding; ubiquitin protein ligase activity; nucleotide binding; molecular_function; ligase activity; protein binding		chr1	66348873	66352410	RefSeq; ENSEMBL; NONCODE	Rattus norvegicus ubiquitin-conjugating enzyme E2M (Ube2m), mRNA.; ubiquitin-conjugating enzyme E2M [gene_biotype:protein_coding transcript_biotype:protein_coding]; cdna:genscan chromosome:Rnor_6.0:1:65537453:65543633:1 transcript_biotype:protein_coding; Non-coding transcript identified by NONCODE	ENSRNOT00000031007	Pfam	1	main
388	17613397	charged multivesicular body protein 2A	Chmp2a	BC167093|FQ230074|FQ231086	Rn.203178	0.115775	up	0.18985	8.68201	8.56623	8.64275	8.60417	8.45177	8.74537	8.70467	8.59599	365191	NM_001108906///XM_006228117///XM_006228118	B2RZB5	NM_001108906; XM_006228117; XM_006228118; ENSRNOT00000030931; BC167093; FQ230074; FQ231086	brain| connective tissue| dorsal root ganglion| embryonic tissue| eye| heart| kidney| lung| pancreas| placenta| prostate| spleen| juvenile| adult	GO:0000920; GO:0006997; GO:0007034; GO:0007080; GO:0010324; GO:0010824; GO:0039702; GO:0045184; GO:0050792; GO:0051258; GO:0051260; GO:0051291; GO:0060548; GO:1901673; GO:1902188; GO:1903543; GO:1903723	cell separation after cytokinesis; nucleus organization; vacuolar transport; mitotic metaphase plate congression; membrane invagination; regulation of centrosome duplication; viral budding via host ESCRT complex; establishment of protein localization; regulation of viral process; protein polymerization; protein homooligomerization; protein heterooligomerization; negative regulation of cell death;…	GO:0005829; GO:0016020; GO:0030117; GO:0070062	cytosol; membrane; membrane coat; extracellular exosome	GO:0019904; GO:0031210; GO:0005515	protein domain specific binding; phosphatidylcholine binding; protein binding		chr1	66352555	66354940	RefSeq; ENSEMBL; GenBank; NONCODE	Rattus norvegicus charged multivesicular body protein 2A (Chmp2a), mRNA.; PREDICTED: Rattus norvegicus charged multivesicular body protein 2A (Chmp2a), transcript variant X1, mRNA.; PREDICTED: Rattus norvegicus charged multivesicular body protein 2A (Chmp2a), transcript variant X2, mRNA.; charged multivesicular body protein 2A [gene_biotype:protein_coding transcript_biotype:protein_coding]; Rattu…	ENSRNOT00000030931	Pfam	1	main					o			o
389	17613406	zinc finger and BTB domain containing 45	Zbtb45		Rn.203449	-0.103575	down	0.618673	6.33695	6.44052	6.50004	6.57726	6.24427	6.23273	6.65809	6.12002	308366	NM_001107478///XM_006228114///XM_006228115	D4A1A3	NM_001107478; XM_006228114; XM_006228115; ENSRNOT00000038860	brain| dorsal root ganglion| heart| kidney| liver| lung| ovary| fetus| juvenile| adult			GO:0005634	nucleus	GO:0003676; GO:0046872	nucleic acid binding; metal ion binding		chr1	66375406	66379533	RefSeq; ENSEMBL; NONCODE	Rattus norvegicus zinc finger and BTB domain containing 45 (Zbtb45), mRNA.; PREDICTED: Rattus norvegicus zinc finger and BTB domain containing 45 (Zbtb45), transcript variant X1, mRNA.; PREDICTED: Rattus norvegicus zinc finger and BTB domain containing 45 (Zbtb45), transcript variant X2, mRNA.; zinc finger and BTB domain containing 45 [gene_biotype:protein_coding transcript_biotype:protein_coding…			1	main
390	17613411	solute carrier family 27 (fatty acid transporter), member 5	Slc27a5	AF242189|BC091147	Rn.207896	-0.0456197	down	0.497181	5.12412	5.16974	5.10967	5.15381	5.24575	5.21651	5.07707	5.0788	79111	NM_024143	Q9ES38	NM_024143; ENSRNOT00000026575; AF242189; BC091147	liver| juvenile	GO:0000038; GO:0001676; GO:0006642; GO:0006699; GO:0008206; GO:0015908; GO:0015911; GO:0046951; GO:0006629; GO:0006631; GO:0008152	very long-chain fatty acid metabolic process; long-chain fatty acid metabolic process; triglyceride mobilization; bile acid biosynthetic process; bile acid metabolic process; fatty acid transport; plasma membrane long-chain fatty acid transport; ketone body biosynthetic process; lipid metabolic process; fatty acid metabolic process; metabolic process	GO:0005783; GO:0009925; GO:0030176; GO:0043231; GO:0043234; GO:0005789; GO:0016020; GO:0016021	endoplasmic reticulum; basal plasma membrane; integral component of endoplasmic reticulum membrane; intracellular membrane-bounded organelle; protein complex; endoplasmic reticulum membrane; membrane; integral component of membrane	GO:0004467; GO:0005524; GO:0015245; GO:0031957; GO:0032403; GO:0047747; GO:0000166; GO:0003824; GO:0016874	long-chain fatty acid-CoA ligase activity; ATP binding; fatty acid transporter activity; very long-chain fatty acid-CoA ligase activity; protein complex binding; cholate-CoA ligase activity; nucleotide binding; catalytic activity; ligase activity		chr1	66387809	66398425	RefSeq; ENSEMBL; GenBank; NONCODE	Rattus norvegicus solute carrier family 27 (fatty acid transporter), member 5 (Slc27a5), mRNA.; solute carrier family 27 (fatty acid transporter), member 5 [gene_biotype:protein_coding transcript_biotype:protein_coding]; Rattus norvegicus bile acid CoA ligase mRNA, complete cds.; Rattus norvegicus solute carrier family 27 (fatty acid transporter), member 5, mRNA (cDNA clone MGC:108681 IMAGE:73705…	ENSRNOT00000026575	Pfam	1	main
391	17613424	microRNA 295-1; microRNA 295-2	Mir295-1; Mir295-2			-0.0225462	down	0.828704	5.64475	5.6673	5.53154	5.84597	5.62438	5.64156	5.69627	5.59644	100314273; 100498801	NR_036045///NR_036047				GO:0010468; GO:0043066	regulation of gene expression; negative regulation of apoptotic process						chr1	66933908	66933988	RefSeq; ENSEMBL; miRBase Micro RNA Database	Rattus norvegicus microRNA 295-1 (Mir295-1), microRNA.; Rattus norvegicus microRNA 295-2 (Mir295-2), microRNA.; microRNA mir-295-2 [gene_biotype:miRNA transcript_biotype:miRNA]; microRNA 295-1 [gene_biotype:miRNA transcript_biotype:miRNA]; MI0012611 Rattus norvegicus miR-295-1 stem-loop; MI0015968 Rattus norvegicus miR-295-2 stem-loop			3	main
392	17613426					0.10298	up	0.344403	5.63097	5.52799	5.68862	5.4089	5.48644	5.70867	5.54374	5.64049													chrUn	0	22471	ENSEMBL	cdna:genscan chromosome:Rnor_6.0:1:65781477:65847487:-1 transcript_biotype:protein_coding			1	main
393	17613434	vomeronasal 1 receptor 55	Vom1r55		Rn.222407	-0.153971	down	0.0833759	4.23388	4.38785	4.34789	4.37223	4.44342	4.33554	4.24036	4.12573	691791	NM_001166763	M0RCP4	NM_001166763; ENSRNOT00000072551		GO:0007186	G-protein coupled receptor signaling pathway	GO:0016021; GO:0016020	integral component of membrane; membrane	GO:0016503	pheromone receptor activity		chr2	187604672	187605568	RefSeq; ENSEMBL	Rattus norvegicus vomeronasal 1 receptor 55 (Vom1r55), mRNA.; vomeronasal 1 receptor 55 [gene_biotype:protein_coding transcript_biotype:protein_coding]	ENSRNOT00000072551	Pfam	1	main
394	17613436	vomeronasal 1 receptor 56	Vom1r56	AY510280	Rn.129412	-0.0034794	down	0.970667	3.8193	3.82278	3.73262	3.8923	3.84341	3.85542	3.67453	3.92794	494277	NM_001008929///XM_003749304	Q5J3N0	NM_001008929; AY510280; ENSRNOT00000040738		GO:0007186	G-protein coupled receptor signaling pathway	GO:0016021; GO:0016020	integral component of membrane; membrane	GO:0016503	pheromone receptor activity		chr1	67466252	67467208	RefSeq; GenBank; ENSEMBL	Rattus norvegicus vomeronasal 1 receptor 56 (Vom1r56), mRNA.; Rattus norvegicus vomeronasal V1r-type receptor V1rj5 mRNA, complete cds.; PREDICTED: Rattus norvegicus vomeronasal type-1 receptor 2-like (LOC100909792), mRNA.; vomeronasal type-1 receptor 2-like [gene_biotype:protein_coding transcript_biotype:protein_coding]; vomeronasal 1 receptor 56 [gene_biotype:protein_coding transcript_biotype:p…	ENSRNOT00000074681; ENSRNOT00000040738	Pfam	1	main
395	17613438	vomeronasal 1 receptor 58	Vom1r58	AY510331	Rn.129410	-0.0428902	down	0.761848	5.4453	5.48819	5.294	5.69109	5.47949	5.32826	5.45215	5.5555	494226	NM_001009507	Q5J3H9; F7EQ62	NM_001009507; ENSRNOT00000048444; AY510331		GO:0007186	G-protein coupled receptor signaling pathway	GO:0016021; GO:0016020	integral component of membrane; membrane	GO:0016503	pheromone receptor activity		chr1	76498340	76499163	RefSeq; ENSEMBL; GenBank	Rattus norvegicus vomeronasal 1 receptor 58 (Vom1r58), mRNA.; vomeronasal 1 receptor 58 [gene_biotype:protein_coding transcript_biotype:protein_coding]; Rattus norvegicus vomeronasal V1r-type receptor V1rj6 mRNA, complete cds.	ENSRNOT00000048444	Pfam	1	main
396	17613440	vomeronasal 1 receptor 59	Vom1r59	AY510282	Rn.129409	-0.0040998	down	0.968708	4.19417	4.19827	4.10773	4.35499	4.1321	4.27845	4.08096	4.22311	494290	NM_001008944///XM_008759093	Q5J3M8	NM_001008944; ENSRNOT00000047760; AY510282		GO:0007186	G-protein coupled receptor signaling pathway	GO:0016021; GO:0016020	integral component of membrane; membrane	GO:0016503	pheromone receptor activity		chr1	76533961	76535129	RefSeq; ENSEMBL; GenBank; NONCODE	Rattus norvegicus vomeronasal 1 receptor 59 (Vom1r59), mRNA.; vomeronasal 1 receptor 59 [gene_biotype:protein_coding transcript_biotype:protein_coding]; Rattus norvegicus vomeronasal V1r-type receptor V1rj4 mRNA, complete cds.; PREDICTED: Rattus norvegicus vomeronasal type-1 receptor 2-like (LOC103691064), partial mRNA.; Non-coding transcript identified by NONCODE	ENSRNOT00000047760	Pfam	1	main
397	17613442	vomeronasal 1 receptor 60	Vom1r60		Rn.222398	0.0862917	up	0.758998	3.13685	3.05055	2.85557	3.18743	3.10865	3.22758	3.50469	2.67827	100312671	NM_001167552	F1M136	NM_001167552; ENSRNOT00000050604		GO:0007186	G-protein coupled receptor signaling pathway	GO:0016021; GO:0016020	integral component of membrane; membrane	GO:0016503	pheromone receptor activity		chr1	76558100	76564296	RefSeq; ENSEMBL	Rattus norvegicus vomeronasal 1 receptor 60 (Vom1r60), mRNA.; vomeronasal 1 receptor, J4-like [gene_biotype:protein_coding transcript_biotype:protein_coding]	ENSRNOT00000050604	Pfam	1	main
398	17613445	vomeronasal 1 receptor 61	Vom1r61	AY510336	Rn.129408	0.0527822	up	0.631359	3.97156	3.91878	3.95411	4.01847	3.78375	4.11749	3.87894	3.91825	494282	NM_001008935	Q5J3H4	NM_001008935; ENSRNOT00000018981; AY510336		GO:0007186	G-protein coupled receptor signaling pathway	GO:0016021; GO:0016020	integral component of membrane; membrane	GO:0016503	pheromone receptor activity		chr1	76666343	76667296	RefSeq; ENSEMBL; GenBank; NONCODE	Rattus norvegicus vomeronasal 1 receptor 61 (Vom1r61), mRNA.; vomeronasal 1 receptor 61 [gene_biotype:protein_coding transcript_biotype:protein_coding]; Rattus norvegicus vomeronasal V1r-type receptor V1rj3 mRNA, complete cds.; cdna:genscan chromosome:Rnor_6.0:1:75298448:75319401:1 transcript_biotype:protein_coding; Non-coding transcript identified by NONCODE	ENSRNOT00000018981	Pfam	1	main
399	17613447	vomeronasal 1 receptor 62	Vom1r62	AY510309	Rn.129407	-0.101288	down	0.668325	4.11744	4.21873	4.45071	4.29906	3.90641	4.16732	3.84022	4.34478	494289	NM_001008943	Q5J3K1	NM_001008943; ENSRNOT00000044964; AY510309		GO:0007186	G-protein coupled receptor signaling pathway	GO:0016021; GO:0016020	integral component of membrane; membrane	GO:0016503	pheromone receptor activity		chr1	76693838	76694785	RefSeq; ENSEMBL; GenBank; NONCODE	Rattus norvegicus vomeronasal 1 receptor 62 (Vom1r62), mRNA.; vomeronasal 1 receptor 62 [gene_biotype:protein_coding transcript_biotype:protein_coding]; Rattus norvegicus vomeronasal V1r-type receptor V1rk2 mRNA, complete cds.; Non-coding transcript identified by NONCODE	ENSRNOT00000044964	Pfam	1	main
400	17613449	ligase I, DNA, ATP-dependent	Lig1	AF276774|BC093604	Rn.20467	-0.190024	down	0.185101	6.86926	7.05928	7.04514	7.13218	7.00052	6.66196	6.89766	7.04816	81513	NM_001024268///XR_590060///XR_590061///XM_008759094	Q566D8; Q9JHY8	NM_001024268; XR_590060; XR_590061; ENSRNOT00000019799; AF276774; BC093604	adipose tissue| adrenal gland| brain| connective tissue| embryonic tissue| eye| liver| lung| muscle| pancreas| pineal gland| spleen| thymus|tailbud embryo| metamorphosing embryo| juvenile| adult	GO:0006260; GO:0006266; GO:0006273; GO:0006281; GO:0006284; GO:0006303; GO:0006310; GO:0033151; GO:0042542; GO:0051103; GO:0051301; GO:0071897; GO:1903461; GO:1903469; GO:0006974; GO:0007049	DNA replication; DNA ligation; lagging strand elongation; DNA repair; base-excision repair; double-strand break repair via nonhomologous end joining; DNA recombination; V(D)J recombination; response to hydrogen peroxide; DNA ligation involved in DNA repair; cell division; DNA biosynthetic process; Okazaki fragment processing involved in mitotic DNA replication; removal of RNA primer involved in m…	GO:0005634; GO:0005654; GO:0005737; GO:0005739; GO:0005794; GO:0043231	nucleus; nucleoplasm; cytoplasm; mitochondrion; Golgi apparatus; intracellular membrane-bounded organelle	GO:0003677; GO:0003909; GO:0003910; GO:0005524; GO:0046872; GO:0000166; GO:0016874	DNA binding; DNA ligase activity; DNA ligase (ATP) activity; ATP binding; metal ion binding; nucleotide binding; ligase activity		chr1	76723841	76762379	RefSeq; ENSEMBL; GenBank; NONCODE	Rattus norvegicus ligase I, DNA, ATP-dependent (Lig1), mRNA.; PREDICTED: Rattus norvegicus ligase I, DNA, ATP-dependent (Lig1), transcript variant X1, misc_RNA.; PREDICTED: Rattus norvegicus ligase I, DNA, ATP-dependent (Lig1), transcript variant X2, misc_RNA.; ligase I, DNA, ATP-dependent [gene_biotype:protein_coding transcript_biotype:protein_coding]; Rattus norvegicus DNA ligase I mRNA, comple…	ENSRNOT00000019799	Pfam	1	main					o			o
401	17613478	phospholipase A2, group IVC (cytosolic, calcium-independent)	Pla2g4c		Rn.137082	-0.0272457	down	0.778175	6.56026	6.58751	6.52551	6.55011	6.6869	6.53967	6.44154	6.69958	691810	NM_001145982///XM_008759023	Q767W3; F1LY61; F1LMQ4	NM_001145982; ENSRNOT00000033633; ENSRNOT00000058334		GO:0009395; GO:0046475; GO:0008152	phospholipid catabolic process; glycerophospholipid catabolic process; metabolic process	GO:0005635; GO:0005654; GO:0005938	nuclear envelope; nucleoplasm; cell cortex	GO:0004620; GO:0047499	phospholipase activity; calcium-independent phospholipase A2 activity		chr1	76824929	76911140	RefSeq; ENSEMBL	Rattus norvegicus phospholipase A2, group IVC (cytosolic, calcium-independent) (Pla2g4c), mRNA.; PREDICTED: Rattus norvegicus similar to phospholipase A2, group IVC (cytosolic, calcium-independent) (LOC691813), transcript variant X3, mRNA.; phospholipase A2, group IVC-like 1 [gene_biotype:protein_coding transcript_biotype:protein_coding]	ENSRNOT00000033633; ENSRNOT00000058334	Pfam	1	main
402	17613493					-0.0139833	down	0.952576	2.56747	2.58145	2.46756	2.85451	2.42229	2.22598	2.78896	2.68747													chr1	76812678	76813016					1	main
403	17613495	similar to phospholipase A2, group IVC (cytosolic, calcium-independent)	LOC691813		Rn.137082	-0.635958	down	0.107696	3.55509	4.19105	4.15325	4.26635	4.15353	2.95621	3.95928	3.74977	691813	XM_006223084///XM_006228335///XM_008759024///XM_008774427	F1LMQ4; Q767W3	ENSRNOT00000058334		GO:0046475; GO:0009395; GO:0008152	glycerophospholipid catabolic process; phospholipid catabolic process; metabolic process	GO:0005635; GO:0005654; GO:0005938	nuclear envelope; nucleoplasm; cell cortex	GO:0047499; GO:0004620	calcium-independent phospholipase A2 activity; phospholipase activity		chrUn	0	68623	RefSeq; ENSEMBL	PREDICTED: Rattus norvegicus similar to phospholipase A2, group IVC (cytosolic, calcium-independent) (LOC691813), transcript variant X1, mRNA.; PREDICTED: Rattus norvegicus similar to phospholipase A2, group IVC (cytosolic, calcium-independent) (LOC691813), transcript variant X4, mRNA.; PREDICTED: Rattus norvegicus similar to phospholipase A2, group IVC (cytosolic, calcium-independent) (LOC691813…	ENSRNOT00000058334	Pfam	1	main
404	17613517					-0.0372506	down	0.771417	2.96247	2.99972	3.01246	3.10405	2.88265	2.91457	3.15664	2.8162													chrUn	0	296					3	main
405	17613519					0.0958711	up	0.539105	3.70845	3.61257	3.79767	3.36292	3.67713	3.71955	3.59892	3.80687													chr1	76966748	76966996					1	main
406	17613521	calcium binding protein 5	Cabp5		Rn.218574	0.269549	up	0.0301465	5.85567	5.58612	5.64908	5.58604	5.52323	5.90298	5.9523	5.71172	365194	NM_001108907///XM_006228328///XM_006228329///XM_006228330///XM_006228331///XM_006228332///XM_006228333	D3ZW89	NM_001108907; XM_006228328; XM_006228329; XM_006228330; XM_006228331; XM_006228332; XM_006228333; ENSRNOT00000020090				GO:0005829	cytosol	GO:0005509; GO:0005515	calcium ion binding; protein binding		chr1	76998160	77010997	RefSeq; ENSEMBL; NONCODE	Rattus norvegicus calcium binding protein 5 (Cabp5), mRNA.; PREDICTED: Rattus norvegicus calcium binding protein 5 (Cabp5), transcript variant X1, mRNA.; PREDICTED: Rattus norvegicus calcium binding protein 5 (Cabp5), transcript variant X2, mRNA.; PREDICTED: Rattus norvegicus calcium binding protein 5 (Cabp5), transcript variant X3, mRNA.; PREDICTED: Rattus norvegicus calcium binding protein 5 (C…	ENSRNOT00000020090	Pfam	1	main
407	17613529					0.00979373	up	0.953448	7.04948	7.03969	6.76703	7.27111	7.08093	7.08887	7.12255	6.93702													chr1	77433750	77433873	ENSEMBL	Small nucleolar RNA SNORA17 [gene_biotype:snoRNA transcript_biotype:snoRNA]			1	main
408	17613531	signal recognition particle 72 kDa protein-like [Source:RGD Symbol;Acc:6502012]; signal recognition particle 72 kDa protein-like	LOC100909747			0.057649	up	0.727595	7.0929	7.03525	6.83597	7.1961	7.07367	7.3043	6.92127	7.05311	100909747	XR_589602											chrUn	0	3646	ENSEMBL; RefSeq; NONCODE	signal recognition particle 72 kDa protein-like [gene_biotype:pseudogene transcript_biotype:pseudogene]; PREDICTED: Rattus norvegicus signal recognition particle 72 kDa protein-like (LOC100909747), transcript variant X1, misc_RNA.; cdna:genscan chromosome:Rnor_6.0:1:76650742:76670254:-1 transcript_biotype:protein_coding; Non-coding transcript identified by NONCODE			1	main
409	17613534					0.330378	up	0.202121	6.18345	5.85307	5.78295	5.58922	6.18705	6.32988	6.2886	5.93186													chr1	78394441	78395462	ENSEMBL	ensembl:novel chromosome:Rnor_6.0:1:77111595:77111879:1 gene:ENSRNOG00000022227 gene_biotype:processed_pseudogene transcript_biotype:processed_pseudogene; cdna:genscan chromosome:Rnor_6.0:1:77110905:77111879:1 transcript_biotype:protein_coding			3	main
410	17613537	oocyte specific homeobox 1	Obox1			-0.049766	down	0.725217	5.38127	5.43103	5.28556	5.43582	5.57172	5.5515	5.19609	5.39621	691860	XM_003753255///XM_006228359											chr1	78880294	78893280	RefSeq; ENSEMBL	PREDICTED: Rattus norvegicus oocyte specific homeobox 1 (Obox1), transcript variant X1, mRNA.; PREDICTED: Rattus norvegicus oocyte specific homeobox 1 (Obox1), transcript variant X2, mRNA.; cdna:genscan chromosome:Rnor_6.0:1:77615142:77628664:-1 transcript_biotype:protein_coding			1	main
411	17613541	Crx opposite strand transcript 1	Crxos1			-0.0817928	down	0.151075	5.69073	5.77253	5.78562	5.77368	5.75828	5.61127	5.69216	5.76877	292625	XM_006223089///XM_006228340///XM_006223088///XM_006228341///XM_006228355	D3Z8J8					GO:0005634	nucleus	GO:0003677	DNA binding		chrUn	0	7587	RefSeq; ENSEMBL	PREDICTED: Rattus norvegicus Crx opposite strand transcript 1 (Crxos1), transcript variant X1, mRNA.; PREDICTED: Rattus norvegicus Crx opposite strand transcript 1 (Crxos1), transcript variant X2, mRNA.; PREDICTED: Rattus norvegicus paired box protein Pax-7-like (LOC102553890), mRNA.; PREDICTED: Rattus norvegicus paired box protein Pax-7-like (LOC102551565), mRNA.; Uncharacterized protein [gene_b…	ENSRNOT00000058230	Pfam	1	main
412	17613551	40S ribosomal protein S19-like	LOC103690015			0.421299	up	0.0169967	8.0773	7.656	7.63251	7.57622	7.75927	8.25211	8.04124	7.93855	103690015	XM_002728672	D3ZGN8			GO:0006412	translation	GO:0005840; GO:0005622	ribosome; intracellular	GO:0003735	structural constituent of ribosome		chr1	79077942	79078419	RefSeq; ENSEMBL	PREDICTED: Rattus norvegicus 40S ribosomal protein S19-like (LOC103690015), mRNA.; 40S ribosomal protein S19-like [gene_biotype:protein_coding transcript_biotype:protein_coding]; cdna:genscan chromosome:Rnor_6.0:1:77541371:77577358:1 transcript_biotype:protein_coding	ENSRNOT00000049028	Pfam	3	main
413	17613554	zinc finger protein 541	Zfp541			-0.109202	down	0.412654	6.11888	6.22808	6.16509	6.24803	6.27114	6.33507	6.07939	5.94219	308108	XM_003748775///XM_003753218///XM_006223090///XM_006223091///XM_006228357///XM_006228358///XM_008759027///XM_008759028///XM_008759029///XM_008774432///XM_008774433	D3Z8I0					GO:0000118; GO:0005634	histone deacetylase complex; nucleus	GO:0003677; GO:0046872; GO:0003676; GO:0003682	DNA binding; metal ion binding; nucleic acid binding; chromatin binding		chr1	79234721	79258774	RefSeq; ENSEMBL; NONCODE	PREDICTED: Rattus norvegicus zinc finger protein 541 (Zfp541), transcript variant X1, mRNA.; PREDICTED: Rattus norvegicus zinc finger protein 541 (Zfp541), transcript variant X3, mRNA.; PREDICTED: Rattus norvegicus zinc finger protein 541 (Zfp541), transcript variant X4, mRNA.; PREDICTED: Rattus norvegicus zinc finger protein 541 (Zfp541), transcript variant X2, mRNA.; PREDICTED: Rattus norvegicu…	ENSRNOT00000058241	Pfam	1	main
414	17613570	N-ethylmaleimide-sensitive factor attachment protein, alpha	Napa	BC063156|FQ216375	Rn.31745	0.0101907	up	0.92066	9.54604	9.53585	9.60726	9.37463	9.62567	9.65009	9.49744	9.49059	140673	NM_080585	P54921	NM_080585; ENSRNOT00000002044; BC063156; FQ216375	adipose tissue| adrenal gland| brain| colon| connective tissue| dorsal root ganglion| eye| heart| kidney| liver| lung| ovary| pancreas| pituitary gland| placenta| prostate| spleen| testis| thymus|tailbud embryo| metamorphosing embryo| fetus| juvenile| adult	GO:0006886; GO:0007420; GO:0010807; GO:0030182; GO:0035249; GO:0035494; GO:0045176; GO:0061025; GO:0006810; GO:0015031; GO:0016192	intracellular protein transport; brain development; regulation of synaptic vesicle priming; neuron differentiation; synaptic transmission, glutamatergic; SNARE complex disassembly; apical protein localization; membrane fusion; transport; protein transport; vesicle-mediated transport	GO:0005774; GO:0016020; GO:0043195; GO:0043209; GO:0070044; GO:0070062	vacuolar membrane; membrane; terminal bouton; myelin sheath; synaptobrevin 2-SNAP-25-syntaxin-1a complex; extracellular exosome	GO:0000149; GO:0005483; GO:0005515; GO:0019905	SNARE binding; soluble NSF attachment protein activity; protein binding; syntaxin binding		chr1	79260969	79279639	RefSeq; ENSEMBL; GenBank; NONCODE	Rattus norvegicus N-ethylmaleimide-sensitive factor attachment protein, alpha (Napa), mRNA.; N-ethylmaleimide-sensitive factor attachment protein, alpha [gene_biotype:protein_coding transcript_biotype:protein_coding]; Rattus norvegicus N-ethylmaleimide-sensitive factor attachment protein, alpha, mRNA (cDNA clone MGC:72716 IMAGE:6921187), complete cds.; Rattus norvegicus TL0ACA43YE04 mRNA sequence…			1	main							o
415	17613585	kaptin (actin binding protein)	Kptn	BC166768	Rn.28449	0.0429457	up	0.292802	6.59729	6.55435	6.58836	6.49363	6.58105	6.60351	6.56304	6.62534	308107	NM_001107457	B2RYG4	NM_001107457; BC166768	brain| connective tissue| eye| heart| kidney| liver| pituitary gland| placenta| prostate| spleen| testis| juvenile| adult	GO:0007015	actin filament organization	GO:0015629	actin cytoskeleton	GO:0003779	actin binding		chr1	79282511	79290168	RefSeq; GenBank; ENSEMBL; NONCODE	Rattus norvegicus kaptin (actin binding protein) (Kptn), mRNA.; Rattus norvegicus kaptin (actin binding protein), mRNA (cDNA clone MGC:188540 IMAGE:7933544), complete cds.; kaptin (actin binding protein) [gene_biotype:protein_coding transcript_biotype:protein_coding]; cdna:genscan chromosome:Rnor_6.0:1:78015788:78053720:1 transcript_biotype:protein_coding; Non-coding transcript identified by NONC…			1	main
416	17613601	solute carrier family 8 (sodium/calcium exchanger), member 2	Slc8a2	U08141	Rn.10305	0.137161	up	0.625376	7.24849	7.11133	6.87343	7.07246	7.38809	7.64424	7.18313	6.91809	140447	NM_078619	P48768; F1M9A2; A0A0G2JZK7	NM_078619; ENSRNOT00000047289; ENSRNOT00000086396; U08141	dorsal root ganglion	GO:0006814; GO:0006816; GO:0006874; GO:0007154; GO:0007612; GO:0007613; GO:0021537; GO:0033280; GO:0035725; GO:0048172; GO:0060291; GO:0060402; GO:0070588; GO:1990034; GO:1990035; GO:0006810; GO:0006811; GO:0055085	sodium ion transport; calcium ion transport; cellular calcium ion homeostasis; cell communication; learning; memory; telencephalon development; response to vitamin D; sodium ion transmembrane transport; regulation of short-term neuronal synaptic plasticity; long-term synaptic potentiation; calcium ion transport into cytosol; calcium ion transmembrane transport; calcium ion export from cell; calci…	GO:0005739; GO:0005874; GO:0005886; GO:0005887; GO:0016021; GO:0042995; GO:0043025; GO:0043197; GO:0016020	mitochondrion; microtubule; plasma membrane; integral component of plasma membrane; integral component of membrane; cell projection; neuronal cell body; dendritic spine; membrane	GO:0005432; GO:0005515; GO:0005516; GO:0015297	calcium:sodium antiporter activity; protein binding; calmodulin binding; antiporter activity		chr1	79296259	79320748	RefSeq; ENSEMBL; GenBank; NONCODE	Rattus norvegicus solute carrier family 8 (sodium/calcium exchanger), member 2 (Slc8a2), mRNA.; solute carrier family 8 (sodium/calcium exchanger), member 2 [gene_biotype:protein_coding transcript_biotype:protein_coding]; Rattus norvegicus Sprague-Dawley Na-Ca exchanger NCX2 isoform mRNA, complete cds.; cdna:genscan chromosome:Rnor_6.0:1:78015788:78053720:1 transcript_biotype:protein_coding; Non-…	ENSRNOT00000047289; ENSRNOT00000086396	Pfam	1	main		o										o
417	17613614	Meis homeobox 3	Meis3	BC160854	Rn.56086	-0.0563887	down	0.465281	6.61502	6.6714	6.80299	6.62144	6.58978	6.5859	6.60128	6.65786	361514	NM_001108472///XM_006228346///XM_006228347///XM_006228348///XM_006228349///XM_006228350///XM_006228351///XM_008758950	B1H242; D4A9U2	NM_001108472; XM_006228346; XM_006228347; XM_006228348; XM_006228349; XM_006228350; XM_006228351; XM_008758950; ENSRNOT00000039538; ENSRNOT00000068406; BC160854	brain| connective tissue| eye| lung| ovary| pancreas| prostate| juvenile| adult	GO:0006355; GO:0051897; GO:2001234; GO:0006366; GO:0045944	regulation of transcription, DNA-templated; positive regulation of protein kinase B signaling; negative regulation of apoptotic signaling pathway; transcription from RNA polymerase II promoter; positive regulation of transcription from RNA polymerase II promoter	GO:0005634	nucleus	GO:0001077; GO:0003677; GO:0003682; GO:0043565	transcriptional activator activity, RNA polymerase II core promoter proximal region sequence-specific binding; DNA binding; chromatin binding; sequence-specific DNA binding		chr1	79335447	79346205	RefSeq; ENSEMBL; GenBank; NONCODE	Rattus norvegicus Meis homeobox 3 (Meis3), mRNA.; PREDICTED: Rattus norvegicus Meis homeobox 3 (Meis3), transcript variant X1, mRNA.; PREDICTED: Rattus norvegicus Meis homeobox 3 (Meis3), transcript variant X2, mRNA.; PREDICTED: Rattus norvegicus Meis homeobox 3 (Meis3), transcript variant X3, mRNA.; PREDICTED: Rattus norvegicus Meis homeobox 3 (Meis3), transcript variant X4, mRNA.; PREDICTED: Ra…	ENSRNOT00000039538; ENSRNOT00000068406	Pfam	1	main
418	17613632					-0.0446077	down	0.601742	2.62408	2.66868	2.77331	2.52997	2.70277	2.60963	2.57825	2.68436													chr1	79581554	79581637					1	main
419	17613634					-0.027559	down	0.910025	5.30748	5.33504	5.56586	5.11082	5.32843	5.04543	5.20597	5.67103													chr1	102527276	102527381					3	main
420	17613636	zinc finger CCCH-type containing 4	Zc3h4	FQ232389	Rn.98823	-0.178666	down	0.057225	7.36573	7.5444	7.52365	7.63407	7.47547	7.27649	7.37727	7.44344	678741	XM_001053214///XM_006223100///XM_006228482///XM_006228483///XM_006228484///XM_006228485///XM_006228486///XM_006228487///XM_006228488///XM_006228489///XM_006228491///XM_006228493///XM_008759031	D3ZVW3	FQ232389	brain| connective tissue| eye| heart| liver| ovary| pancreas| placenta| prostate| adult					GO:0044822; GO:0046872	poly(A) RNA binding; metal ion binding		chr1	79607132	79643347	RefSeq; ENSEMBL; GenBank; NONCODE	PREDICTED: Rattus norvegicus zinc finger CCCH-type containing 4 (Zc3h4), transcript variant X11, mRNA.; PREDICTED: Rattus norvegicus zinc finger CCCH-type containing 4 (Zc3h4), transcript variant X1, mRNA.; PREDICTED: Rattus norvegicus zinc finger CCCH-type containing 4 (Zc3h4), transcript variant X2, mRNA.; PREDICTED: Rattus norvegicus zinc finger CCCH-type containing 4 (Zc3h4), transcript varia…	ENSRNOT00000020509	Pfam	1	main
421	17613652	transmembrane protein 160	Tmem160		Rn.39053	-0.0397898	down	0.82787	8.2664	8.30619	8.45254	8.0869	8.37914	8.04462	8.25946	8.49513	292654	NM_001106227	D3ZZU4	NM_001106227; ENSRNOT00000020609	dorsal root ganglion| eye| heart| lung| adult			GO:0005739; GO:0016021; GO:0016020	mitochondrion; integral component of membrane; membrane				chr1	79664960	79667668	RefSeq; ENSEMBL; NONCODE	Rattus norvegicus transmembrane protein 160 (Tmem160), mRNA.; transmembrane protein 160 [gene_biotype:protein_coding transcript_biotype:protein_coding]; cdna:genscan chromosome:Rnor_6.0:1:78417900:78420356:1 transcript_biotype:protein_coding; Non-coding transcript identified by NONCODE			1	main
422	17613658	guanine nucleotide binding protein (G protein), gamma 5 [Source:RGD Symbol;Acc:620807]	Gng5	BC058469|M95780		0.0448882	up	0.615205	8.18361	8.13872	8.11161	8.13765	8.1669	8.12861	8.07929	8.34292		NM_024377	P63219			GO:0007186; GO:0008150; GO:0007165	G-protein coupled receptor signaling pathway; biological_process; signal transduction	GO:0005834; GO:0005575; GO:0016020; GO:0070062; GO:0005886	heterotrimeric G-protein complex; cellular_component; membrane; extracellular exosome; plasma membrane	GO:0005515; GO:0003674; GO:0004871; GO:0030165	protein binding; molecular_function; signal transducer activity; PDZ domain binding		chr1	79793225	79793572	ENSEMBL; RefSeq; GenBank; NONCODE	guanine nucleotide binding protein (G protein), gamma 5 [gene_biotype:protein_coding transcript_biotype:protein_coding]; Rattus norvegicus guanine nucleotide binding protein (G protein), gamma 5 (Gng5), mRNA.; Rattus norvegicus guanine nucleotide binding protein (G protein), gamma 5, mRNA (cDNA clone MGC:72806 IMAGE:6918279), complete cds.; Rat G protein gamma-5 subunit mRNA, complete cds.; guani…	ENSRNOT00000058172	Pfam	1	main
423	17613662					-0.0877113	down	0.457373	5.71096	5.79867	5.63894	5.83292	5.92415	5.64001	5.84228	5.6506													chrUn	0	4778					1	main
424	17613670	adaptor-related protein complex 2, sigma 1 subunit	Ap2s1	BC088138|FQ234449|M37194|U75917	Rn.37866	-0.0602597	down	0.691245	8.32749	8.38775	8.62683	8.18721	8.34922	8.21371	8.40802	8.36075	65046	NM_022952	P62744	NM_022952; ENSRNOT00000021310; BC088138; FQ234449; M37194; U75917	adrenal gland| brain| connective tissue| dorsal root ganglion| embryonic tissue| eye| heart| kidney| lung| pancreas| placenta| prostate| spleen| juvenile| adult	GO:0006886; GO:0006897; GO:0006810; GO:0015031; GO:0016192	intracellular protein transport; endocytosis; transport; protein transport; vesicle-mediated transport	GO:0005794; GO:0005886; GO:0030121; GO:0030122; GO:0005905; GO:0016020; GO:0030117	Golgi apparatus; plasma membrane; AP-1 adaptor complex; AP-2 adaptor complex; coated pit; membrane; membrane coat	GO:0008565	protein transporter activity		chrUn	0	12066	RefSeq; ENSEMBL; GenBank; NONCODE	Rattus norvegicus adaptor-related protein complex 2, sigma 1 subunit (Ap2s1), mRNA.; adaptor-related protein complex 2, sigma 1 subunit [gene_biotype:protein_coding transcript_biotype:protein_coding]; Rattus norvegicus adaptor-related protein complex 2, sigma 1 subunit, mRNA (cDNA clone MGC:108685 IMAGE:7374432), complete cds.; Rattus norvegicus TL0AEA58YO24 mRNA sequence.; Rat clathrin-associate…	ENSRNOT00000021310	Pfam	1	main
425	17613677	solute carrier family 1 (neutral amino acid transporter), member 5	Slc1a5	BC080242|LC035075	Rn.28965	-0.236548	down	0.205419	5.33046	5.56701	5.50541	5.64898	5.54663	5.15194	5.20948	5.62996	292657	NM_175758	Q9Z1J7; D3ZJ25; A0A0F7R4W9	NM_175758; ENSRNOT00000021455; ENSRNOT00000064332; BC080242; LC035075	adipose tissue| dorsal root ganglion| embryonic tissue| eye| kidney| liver| lung| ovary| pituitary gland| prostate| testis| thymus| metamorphosing embryo| juvenile| adult	GO:0003333; GO:0006835; GO:0006860; GO:0015804; GO:0015825; GO:0055085; GO:0006810	amino acid transmembrane transport; dicarboxylic acid transport; extracellular amino acid transport; neutral amino acid transport; L-serine transport; transmembrane transport; transport	GO:0005576; GO:0005794; GO:0005886; GO:0016020; GO:0016021; GO:0070062	extracellular region; Golgi apparatus; plasma membrane; membrane; integral component of membrane; extracellular exosome	GO:0015171; GO:0015175; GO:0015194; GO:0016595; GO:0017153; GO:0015293; GO:0005515	amino acid transmembrane transporter activity; neutral amino acid transmembrane transporter activity; L-serine transmembrane transporter activity; glutamate binding; sodium:dicarboxylate symporter activity; symporter activity; protein binding		chr1	79957648	79971751	RefSeq; ENSEMBL; GenBank; NONCODE	Rattus norvegicus solute carrier family 1 (neutral amino acid transporter), member 5 (Slc1a5), mRNA.; solute carrier family 1 (neutral amino acid transporter), member 5 [gene_biotype:protein_coding transcript_biotype:protein_coding]; Rattus norvegicus solute carrier family 1 (neutral amino acid transporter), member 5, mRNA (cDNA clone MGC:91449 IMAGE:7100054), complete cds.; Rattus norvegicus rat…	ENSRNOT00000021455; ENSRNOT00000064332	Pfam	1	main
426	17613690	striatin, calmodulin binding protein 4	Strn4	BC168948	Rn.137083	-0.0380391	down	0.549576	7.97899	8.01703	7.98055	8.04462	8.02592	7.89444	8.08245	7.9601	308392	NM_001107480///NM_001161809	B5DF70; F1M6V8; A0A0G2JX43	NM_001107480; NM_001161809; ENSRNOT00000021976; ENSRNOT00000089715; BC168948	brain| colon| dorsal root ganglion| heart| kidney| liver| lung| nerve| ovary| pancreas| pituitary gland| placenta| prostate| spleen| testis| thymus|tailbud embryo| metamorphosing embryo| fetus| juvenile| adult	GO:0008150	biological_process	GO:0000159; GO:0043197; GO:0043234	protein phosphatase type 2A complex; dendritic spine; protein complex	GO:0005515; GO:0019904; GO:0032403; GO:0051721; GO:0070016	protein binding; protein domain specific binding; protein complex binding; protein phosphatase 2A binding; armadillo repeat domain binding		chr1	79987125	80012895	RefSeq; ENSEMBL; GenBank; NONCODE	Rattus norvegicus striatin, calmodulin binding protein 4 (Strn4), transcript variant 1, mRNA.; Rattus norvegicus striatin, calmodulin binding protein 4 (Strn4), transcript variant 2, mRNA.; striatin, calmodulin binding protein 4 [gene_biotype:protein_coding transcript_biotype:protein_coding]; Rattus norvegicus striatin, calmodulin binding protein 4, mRNA (cDNA clone MGC:189254 IMAGE:7308304), com…	ENSRNOT00000021976; ENSRNOT00000089715	Pfam	1	main
427	17613711	protein kinase D2	Prkd2	BC083592|FQ218070	Rn.15035	-0.309578	down	0.0981336	6.70112	7.0107	7.17091	6.95709	6.90411	6.57241	6.59256	6.9384	292658	NM_001013895///XM_008758905	Q5XIS9	NM_001013895; XM_008758905; ENSRNOT00000022360; BC083592; FQ218070	adipose tissue| brain| colon| connective tissue| heart| kidney| liver| lung| placenta| prostate| spleen| testis| thymus| vibrissa| metamorphosing embryo| fetus| juvenile| adult			GO:0005634; GO:0005654; GO:0005737; GO:0005794; GO:0005886; GO:0016020	nucleus; nucleoplasm; cytoplasm; Golgi apparatus; plasma membrane; membrane	GO:0004672; GO:0004674; GO:0004697; GO:0005524; GO:0046872; GO:0000166; GO:0016301; GO:0016740; GO:0005515	protein kinase activity; protein serine/threonine kinase activity; protein kinase C activity; ATP binding; metal ion binding; nucleotide binding; kinase activity; transferase activity; protein binding		chr1	80015106	80043543	RefSeq; ENSEMBL; GenBank; NONCODE	Rattus norvegicus protein kinase D2 (Prkd2), mRNA.; PREDICTED: Rattus norvegicus protein kinase D2 (Prkd2), transcript variant X1, mRNA.; protein kinase D2 [gene_biotype:protein_coding transcript_biotype:protein_coding]; Rattus norvegicus protein kinase D2, mRNA (cDNA clone MGC:94325 IMAGE:7132731), complete cds.; Rattus norvegicus TL0ABA9YN15 mRNA sequence.; cdna:genscan chromosome:Rnor_6.0:1:78…	ENSRNOT00000022360	Pfam	1	main
428	17613732	dishevelled-binding antagonist of beta-catenin 3	Dact3		Rn.93232	-0.0890176	down	0.216724	7.65577	7.74479	7.69935	7.79704	7.73797	7.57916	7.62889	7.75927	499088	NM_001191947	M0R4J7	NM_001191947; ENSRNOT00000084601	brain| connective tissue| eye| heart| adult	GO:0010719; GO:0030111; GO:0030178; GO:0030308; GO:0035414; GO:0090090	negative regulation of epithelial to mesenchymal transition; regulation of Wnt signaling pathway; negative regulation of Wnt signaling pathway; negative regulation of cell growth; negative regulation of catenin import into nucleus; negative regulation of canonical Wnt signaling pathway	GO:0005737	cytoplasm	GO:0005080; GO:0008013; GO:0042802; GO:0051018; GO:0070097; GO:0005515	protein kinase C binding; beta-catenin binding; identical protein binding; protein kinase A binding; delta-catenin binding; protein binding		chr1	80048066	80059888	RefSeq; ENSEMBL	Rattus norvegicus dapper, antagonist of beta-catenin, homolog 3 (Xenopus laevis) (Dact3), mRNA.; dishevelled-binding antagonist of beta-catenin 3 [gene_biotype:protein_coding transcript_biotype:protein_coding]; cdna:genscan chromosome:Rnor_6.0:1:78800856:78811615:1 transcript_biotype:protein_coding	ENSRNOT00000084601	Pfam	1	main
429	17613737	guanine nucleotide binding protein (G protein), gamma 8	Gng8	L35921	Rn.11233	-0.146519	down	0.589854	6.43439	6.58091	6.8903	6.47837	6.37406	6.04526	6.62808	6.62983	245986	NM_139185///XM_006228384///XM_006228385	P63077	NM_139185; XM_006228384; XM_006228385; ENSRNOT00000022441; ENSRNOT00000090417; L35921	brain| dorsal root ganglion| kidney| prostate| fetus| adult	GO:0007186; GO:0007399; GO:0035176; GO:0043584; GO:0071444; GO:0007165	G-protein coupled receptor signaling pathway; nervous system development; social behavior; nose development; cellular response to pheromone; signal transduction	GO:0005834; GO:0005886; GO:0016020	heterotrimeric G-protein complex; plasma membrane; membrane	GO:0004871; GO:0005515	signal transducer activity; protein binding		chr1	80067694	80069629	RefSeq; ENSEMBL; GenBank; NONCODE	Rattus norvegicus guanine nucleotide binding protein (G protein), gamma 8 (Gng8), mRNA.; PREDICTED: Rattus norvegicus guanine nucleotide binding protein (G protein), gamma 8 (Gng8), transcript variant X1, mRNA.; PREDICTED: Rattus norvegicus guanine nucleotide binding protein (G protein), gamma 8 (Gng8), transcript variant X2, mRNA.; guanine nucleotide binding protein (G protein), gamma 8 [gene_bi…	ENSRNOT00000022441; ENSRNOT00000090417	Pfam	1	main		o
430	17613742	prostaglandin I2 (prostacyclin) receptor (IP)	Ptgir		Rn.225777	0.120125	up	0.345002	5.7865	5.66637	5.5052	5.66256	5.83136	5.90025	5.76862	5.69063	292661	NM_001077644	P43253	NM_001077644; ENSRNOT00000022461		GO:0007189; GO:0010642; GO:0030819; GO:0032496; GO:0043950; GO:0048662; GO:0007165; GO:0007186	adenylate cyclase-activating G-protein coupled receptor signaling pathway; negative regulation of platelet-derived growth factor receptor signaling pathway; positive regulation of cAMP biosynthetic process; response to lipopolysaccharide; positive regulation of cAMP-mediated signaling; negative regulation of smooth muscle cell proliferation; signal transduction; G-protein coupled receptor signali…	GO:0005829; GO:0005886; GO:0016021; GO:0016020	cytosol; plasma membrane; integral component of membrane; membrane	GO:0004930; GO:0004871	G-protein coupled receptor activity; signal transducer activity	NM_001077644 // GenMAPP // GPCRDB_Class_A_Rhodopsin-like///NM_001077644 // GenMAPP // Small_ligand_GPCRs///ENSRNOT00000022461 // GenMAPP // GPCRDB_Class_A_Rhodopsin-like///ENSRNOT00000022461 // GenMAPP // Small_ligand_GPCRs	chr1	80080854	80083237	RefSeq; ENSEMBL; NONCODE	Rattus norvegicus prostaglandin I2 (prostacyclin) receptor (IP) (Ptgir), mRNA.; prostaglandin I2 (prostacyclin) receptor (IP) [gene_biotype:protein_coding transcript_biotype:protein_coding]; cdna:genscan chromosome:Rnor_6.0:1:78833531:78836941:1 transcript_biotype:protein_coding; Non-coding transcript identified by NONCODE	ENSRNOT00000022461	Pfam	1	main
431	17613749	paraneoplastic Ma antigen family-like 2	Pnmal2		Rn.98225	0.195551	up	0.294434	8.82942	8.63387	8.56367	8.69184	8.6461	8.95308	9.01909	8.5161	308393	NM_001107481	D3ZQN3	NM_001107481; ENSRNOT00000022610	adrenal gland| brain| pituitary gland| prostate| juvenile| adult								chr1	80123763	80126337	RefSeq; ENSEMBL; NONCODE	Rattus norvegicus paraneoplastic Ma antigen family-like 2 (Pnmal2), mRNA.; paraneoplastic Ma antigen family-like 2 [gene_biotype:protein_coding transcript_biotype:protein_coding]; cdna:genscan chromosome:Rnor_6.0:1:78876870:78878558:1 transcript_biotype:protein_coding; Non-coding transcript identified by NONCODE	ENSRNOT00000022610	Pfam	1	main
432	17613753	paraneoplastic Ma antigen family-like 1	Pnmal1		Rn.66585	0.176173	up	0.56407	7.17335	6.99717	6.78997	7.0035	7.19805	7.53127	7.30798	6.68079	361515	NM_001108473///XM_006228440///XM_008758951	D3ZA53	NM_001108473; XM_006228440; XM_008758951; ENSRNOT00000029825	brain| connective tissue| adult								chr1	80140829	80143488	RefSeq; ENSEMBL; NONCODE	Rattus norvegicus paraneoplastic Ma antigen family-like 1 (Pnmal1), mRNA.; PREDICTED: Rattus norvegicus paraneoplastic Ma antigen family-like 1 (Pnmal1), transcript variant X1, mRNA.; PREDICTED: Rattus norvegicus paraneoplastic Ma antigen family-like 1 (Pnmal1), transcript variant X2, mRNA.; paraneoplastic Ma antigen family-like 1 [gene_biotype:protein_coding transcript_biotype:protein_coding]; c…	ENSRNOT00000029825	Pfam	1	main
433	17613757	coiled-coil domain containing 8	Ccdc8	BC060520	Rn.145404	0.176491	up	0.285919	6.00507	5.82858	5.98793	5.74299	5.75482	6.2338	5.949	5.83242	494320	NM_001009533	P62521; A0A0G2JTP3	NM_001009533; ENSRNOT00000029810; BC060520	connective tissue| embryonic tissue| eye| heart| lung| prostate| spleen|tailbud embryo| metamorphosing embryo| adult	GO:0000226; GO:0007088; GO:0010923	microtubule cytoskeleton organization; regulation of mitotic nuclear division; negative regulation of phosphatase activity	GO:0005737; GO:0005813; GO:0005886; GO:1990393; GO:0005815; GO:0005856	cytoplasm; centrosome; plasma membrane; 3M complex; microtubule organizing center; cytoskeleton				chr1	80180875	80184203	RefSeq; ENSEMBL; GenBank; NONCODE	Rattus norvegicus coiled-coil domain containing 8 (Ccdc8), mRNA.; coiled-coil domain containing 8 [gene_biotype:protein_coding transcript_biotype:protein_coding]; Rattus norvegicus similar to coiled-coil domain containing 8, mRNA (cDNA clone MGC:72567 IMAGE:5597839), complete cds.; cdna:genscan chromosome:Rnor_6.0:1:78933925:78942542:1 transcript_biotype:protein_coding; cdna:genscan chromosome:Rn…	ENSRNOT00000029810	Pfam	1	main
434	17613759					-0.141197	down	0.500368	7.61953	7.76072	7.47525	8.00389	7.80303	7.45105	7.83307	7.57446													chr1	80192955	80215873					1	main
435	17613764	carcinoembryonic antigen gene family 4	Cgm4	BC097366	Rn.25934; Rn.161808	-0.160463	down	0.247865	5.10122	5.26168	5.20176	5.21326	5.37002	5.05882	5.30157	4.94327	24257	NM_012525	Q4V8J0; Q4V883	NM_012525; BC097366; ENSRNOT00000037086; ENSRNOT00000088925	placenta| spleen| adult								chr1	80277477	80290359	RefSeq; GenBank; ENSEMBL; NONCODE	Rattus norvegicus carcinoembryonic antigen gene family 4 (Cgm4), mRNA.; Rattus norvegicus carcinoembryonic antigen gene family 4, mRNA (cDNA clone MGC:114399 IMAGE:7443149), complete cds.; pregnancy specific glycoprotein 16 [gene_biotype:protein_coding transcript_biotype:protein_coding]; cdna:genscan chromosome:Rnor_6.0:1:79032172:79042610:1 transcript_biotype:protein_coding; Non-coding transcrip…	ENSRNOT00000037086; ENSRNOT00000088925	Pfam	1	main
436	17613772	pregnancy specific glycoprotein 16	Psg16	BC097499	Rn.161808; Rn.25934	-0.0280122	down	0.859377	4.09462	4.12263	4.33537	4.14666	3.88586	4.02127	4.02642	4.23616	308394	NM_001025679///XM_006228417	Q4V883; Q4V8J0	NM_001025679; XM_006228417; BC097499; ENSRNOT00000058060; ENSRNOT00000088925	placenta| spleen| adult								chrUn	0	16101	RefSeq; GenBank; ENSEMBL; NONCODE	Rattus norvegicus pregnancy specific glycoprotein 16 (Psg16), mRNA.; PREDICTED: Rattus norvegicus pregnancy specific glycoprotein 16 (Psg16), transcript variant X1, mRNA.; Rattus norvegicus similar to brain carcinoembryonic antigen, mRNA (cDNA clone MGC:114574 IMAGE:7462593), complete cds.; pregnancy specific glycoprotein 16 [gene_biotype:protein_coding transcript_biotype:protein_coding]; Non-cod…	ENSRNOT00000058060; ENSRNOT00000088925	Pfam	1	main
437	17613780	carcinoembryonic antigen-related cell adhesion molecule 3	Ceacam3	BC098921|M32474	Rn.10064; Rn.230455	-0.308249	down	0.00172497	4.90049	5.20874	5.16947	5.23829	5.21845	4.88648	4.84651	4.96848	24926	NM_012702	Q63111; Q4KLZ7	NM_012702; ENSRNOT00000023663; BC098921; M32474	placenta| adult	GO:0008150	biological_process	GO:0005575	cellular_component	GO:0003674	molecular_function		chr1	80368019	80380736	RefSeq; ENSEMBL; GenBank; NONCODE	Rattus norvegicus carcinoembryonic antigen-related cell adhesion molecule 3 (Ceacam3), mRNA.; carcinoembryonic antigen-related cell adhesion molecule 3 [gene_biotype:protein_coding transcript_biotype:protein_coding]; Rattus norvegicus carcinoembryonic antigen-related cell adhesion molecule 3, mRNA (cDNA clone MGC:114355 IMAGE:7441743), complete cds.; Rattus norvegicus carcinoembryonic antigen-rel…	ENSRNOT00000023663	Pfam	1	main
438	17613791	pregnancy-specific beta 1-glycoprotein	Psgb1	U66292	Rn.42878	0.0561344	up	0.674345	2.9875	2.93136	2.8803	2.98347	2.93032	2.82159	3.22163	2.91926	59313	NM_021677///XM_006228464	Q9Z1D6; G3V925	NM_021677; XM_006228464; ENSRNOT00000037132; U66292	placenta| spleen| adult	GO:0007565	female pregnancy						chr1	80428741	80437624	RefSeq; ENSEMBL; GenBank; NONCODE	Rattus norvegicus pregnancy-specific beta 1-glycoprotein (Psgb1), mRNA.; PREDICTED: Rattus norvegicus pregnancy-specific beta 1-glycoprotein (Psgb1), transcript variant X1, mRNA.; pregnancy-specific beta 1-glycoprotein [gene_biotype:protein_coding transcript_biotype:protein_coding]; Rattus norvegicus pregnancy-specific beta 1-glycoprotein mRNA, complete cds.; cdna:genscan chromosome:Rnor_6.0:1:79…	ENSRNOT00000037132	Pfam	1	main
439	17613800	carcinoembryonic antigen-related cell adhesion molecule 5-like	LOC102550682			0.0727371	up	0.347614	3.37486	3.30213	3.19682	3.2987	3.41086	3.43076	3.36225	3.33158	102550682	XM_006223308///XM_006228530	D3ZAN0					GO:0016020; GO:0016021	membrane; integral component of membrane				chr1	80534249	80544253	RefSeq; ENSEMBL; NONCODE	PREDICTED: Rattus norvegicus carcinoembryonic antigen-related cell adhesion molecule 5-like (LOC102550682), transcript variant X1, mRNA.; PREDICTED: Rattus norvegicus carcinoembryonic antigen-related cell adhesion molecule 5-like (LOC102550682), transcript variant X2, mRNA.; Protein LOC102550682 [gene_biotype:protein_coding transcript_biotype:protein_coding]; cdna:genscan chromosome:Rnor_6.0:1:79…	ENSRNOT00000024155	Pfam	1	main
440	17613811	carcinoembryonic antigen-related cell adhesion molecule 5-like	LOC102557244; LOC102550682			-0.0661567	down	0.339987	5.3415	5.40766	5.52705	5.3592	5.33672	5.34811	5.35713	5.31927	102557244; 102550682	XM_006223101///XM_006228530	D3ZT23										chrUn	0	36025	RefSeq; ENSEMBL	PREDICTED: Rattus norvegicus carcinoembryonic antigen-related cell adhesion molecule 5-like (LOC102557244), mRNA.; PREDICTED: Rattus norvegicus carcinoembryonic antigen-related cell adhesion molecule 5-like (LOC102550682), transcript variant X2, mRNA.; carcinoembryonic antigen-related cell adhesion molecule 5-like [gene_biotype:protein_coding transcript_biotype:protein_coding]; cdna:genscan chrom…	ENSRNOT00000058040	Pfam	1	main
441	17613818	carcinoembryonic antigen-related cell adhesion molecule 11	Ceacam11	BC097990|U66293	Rn.205326	0.186519	up	0.117004	3.98315	3.79663	3.80435	3.72615	3.8594	4.00399	3.82625	4.11922	292668	NM_001025404	Q4QQU3; Q9Z1D5	NM_001025404; ENSRNOT00000023686; BC097990; U66293	placenta| adult	GO:0007565	female pregnancy						chr1	80642416	80648652	RefSeq; ENSEMBL; GenBank; NONCODE	Rattus norvegicus carcinoembryonic antigen-related cell adhesion molecule 11 (Ceacam11), mRNA.; carcinoembryonic antigen-related cell adhesion molecule 11 [gene_biotype:protein_coding transcript_biotype:protein_coding]; Rattus norvegicus carcinoembryonic antigen-related cell adhesion molecule 11, mRNA (cDNA clone MGC:116133 IMAGE:7445748), complete cds.; Rattus norvegicus pregnancy-specific beta …	ENSRNOT00000023686	Pfam	1	main
442	17613823	IGF-like family member 3	Igfl3	BC099083|BC158846	Rn.17980	-0.113539	down	0.347757	5.16826	5.2818	5.16338	5.36173	5.32027	5.30274	5.0024	5.19963	361516	NM_001108474///XR_350156	B0BNJ2	NM_001108474; XR_350156; ENSRNOT00000044927; BC099083; BC158846	placenta| spleen| adult								chr1	80719459	80811450	RefSeq; ENSEMBL; GenBank; NONCODE	Rattus norvegicus IGF-like family member 3 (Igfl3), mRNA.; PREDICTED: Rattus norvegicus IGF-like family member 3 (Igfl3), transcript variant X1, misc_RNA.; carcinoembryonic antigen-related cell adhesion molecule 12 [gene_biotype:protein_coding transcript_biotype:protein_coding]; Rattus norvegicus cDNA clone IMAGE:7444761.; Rattus norvegicus IGF-like family member 3, mRNA (cDNA clone MGC:188322 IM…	ENSRNOT00000044927	Pfam	1	main
443	17613830	gene model 580	LOC100362729			0.194009	up	0.188531	5.0531	4.85909	5.00473	4.64848	4.92406	4.93854	5.09277	5.12798	100362729	XM_006223309///XM_006228531	M0RC02					GO:0005615	extracellular space	GO:0005515	protein binding		chrUn	0	53785	RefSeq; ENSEMBL	PREDICTED: Rattus norvegicus gene model 580 (LOC100362729), mRNA.; gene model 580-like [gene_biotype:protein_coding transcript_biotype:protein_coding]; cdna:genscan chromosome:Rnor_6.0:1:79569423:79630795:1 transcript_biotype:protein_coding			1	main
444	17613834					-0.272606	down	0.296976	5.43145	5.70406	5.5515	6.14387	5.41681	5.43283	5.50609	5.35544													chr1	80856923	80857047					3	main
445	17613836					-0.0812983	down	0.547516	5.39252	5.47382	5.47031	5.26381	5.68734	5.35936	5.38992	5.42828													chr1	80869572	80874586	ENSEMBL	cdna:genscan chromosome:Rnor_6.0:1:79569423:79630795:1 transcript_biotype:protein_coding			1	main
446	17613841	MHC I like leukocyte 1	Mill1	AB113960|AB113962	Rn.144784	-0.185634	down	0.280302	5.82346	6.00909	5.86552	5.93459	6.22718	5.95005	5.62765	5.89268	292671	NM_001011931///XM_008758906///XM_008758907	Q60I18; Q60I20	NM_001011931; XM_008758906; XM_008758907; ENSRNOT00000035286; ENSRNOT00000083546; AB113960; AB113962		GO:0002429; GO:0002474; GO:0002626; GO:0006879; GO:0006955; GO:0006979; GO:0009408; GO:0032526; GO:0046629; GO:0050689; GO:0097459; GO:0001916; GO:0019882	immune response-activating cell surface receptor signaling pathway; antigen processing and presentation of peptide antigen via MHC class I; negative regulation of T cell antigen processing and presentation; cellular iron ion homeostasis; immune response; response to oxidative stress; response to heat; response to retinoic acid; gamma-delta T cell activation; negative regulation of defense respons…	GO:0005886; GO:0016021; GO:0031362; GO:0042612; GO:0016020	plasma membrane; integral component of membrane; anchored component of external side of plasma membrane; MHC class I protein complex; membrane	GO:0005102; GO:0042605; GO:0046703; GO:0005515; GO:0003823	receptor binding; peptide antigen binding; natural killer cell lectin-like receptor binding; protein binding; antigen binding		chrUn	0	27051	RefSeq; ENSEMBL; GenBank; NONCODE	Rattus norvegicus MHC I like leukocyte 1 (Mill1), mRNA.; PREDICTED: Rattus norvegicus MHC I like leukocyte 1 (Mill1), transcript variant X1, mRNA.; PREDICTED: Rattus norvegicus MHC I like leukocyte 1 (Mill1), transcript variant X2, mRNA.; MHC I like leukocyte 1 [gene_biotype:protein_coding transcript_biotype:protein_coding]; Rattus norvegicus Mill1 mRNA for MHC class I-like located near the LRC, …	ENSRNOT00000035286; ENSRNOT00000083546	Pfam	1	main				o								o
447	17613853	similar to destrin [Source:RGD Symbol;Acc:1596830]	LOC680058			0.117163	up	0.297307	2.49505	2.37789	2.28319	2.42151	2.42897	2.57038	2.32422	2.59055			D4A315			GO:0051014; GO:0030042; GO:0030836	actin filament severing; actin filament depolymerization; positive regulation of actin filament depolymerization	GO:0015629; GO:0005622	actin cytoskeleton; intracellular	GO:0003779	actin binding		chr1	80990003	80990519	ENSEMBL	similar to destrin [gene_biotype:protein_coding transcript_biotype:protein_coding]; cdna:genscan chromosome:Rnor_6.0:1:79716207:79771889:1 transcript_biotype:protein_coding	ENSRNOT00000034790	Pfam	1	main
448	17613856					0.118917	up	0.420029	7.61499	7.49607	7.30629	7.68046	7.50146	7.76235	7.505	7.57762													chr1	80991850	80994591	ENSEMBL	cdna:genscan chromosome:Rnor_6.0:1:79716207:79771889:1 transcript_biotype:protein_coding			1	main
449	17613859	MHC class I polypeptide-related sequence B	Micb	AB113963|AB113961	Rn.215725	0.082102	up	0.0491518	5.48615	5.40404	5.46088	5.38786	5.36339	5.48202	5.48566	5.49076	365212	NM_001017468	Q60I19; A0A0G2K7V7	NM_001017468; ENSRNOT00000083211; AB113963	brain| ovary| juvenile	GO:0002626; GO:0006879; GO:0006955; GO:0097459	negative regulation of T cell antigen processing and presentation; cellular iron ion homeostasis; immune response; iron ion import into cell	GO:0005623; GO:0016021; GO:0031362	cell; integral component of membrane; anchored component of external side of plasma membrane	GO:0005102; GO:0005515	receptor binding; protein binding		chrUn	0	17020	RefSeq; ENSEMBL; GenBank; NONCODE	Rattus norvegicus MHC class I polypeptide-related sequence B (Micb), mRNA.; MHC class I polypeptide-related sequence B [gene_biotype:protein_coding transcript_biotype:protein_coding]; Rattus norvegicus Mill2 mRNA for MHC class I-like located near the LRC, 2, complete cds, strain:BN/SsN.; cdna:genscan chromosome:Rnor_6.0:1:79716207:79771889:1 transcript_biotype:protein_coding; Rattus norvegicus Mi…	ENSRNOT00000083211	Pfam	1	main												o
450	17613865	peptidoglycan recognition protein 1	Pglyrp1	AF154114	Rn.2834	0.109039	up	0.148014	5.81776	5.70872	5.72564	5.75517	5.64536	5.8891	5.84605	5.71813	84387	NM_053373	Q9JLN4; G3V7R2	NM_053373; ENSRNOT00000018233; AF154114	fetus| adult	GO:0002221; GO:0006955; GO:0009253; GO:0016045; GO:0032689; GO:0032827; GO:0042742; GO:0044117; GO:0045087; GO:0045187; GO:0050728; GO:0050830; GO:0002376	pattern recognition receptor signaling pathway; immune response; peptidoglycan catabolic process; detection of bacterium; negative regulation of interferon-gamma production; negative regulation of natural killer cell differentiation involved in immune response; defense response to bacterium; growth of symbiont in host; innate immune response; regulation of circadian sleep/wake cycle, sleep; negat…	GO:0005576; GO:0070062	extracellular region; extracellular exosome	GO:0008270; GO:0008745; GO:0016019; GO:0042834	zinc ion binding; N-acetylmuramoyl-L-alanine amidase activity; peptidoglycan receptor activity; peptidoglycan binding		chrUn	0	5192	RefSeq; ENSEMBL; GenBank; NONCODE	Rattus norvegicus peptidoglycan recognition protein 1 (Pglyrp1), mRNA.; peptidoglycan recognition protein 1 [gene_biotype:protein_coding transcript_biotype:protein_coding]; Rattus norvegicus peptidoglycan recognition protein PGRP (Pgrp) mRNA, complete cds.; cdna:genscan chromosome:Rnor_6.0:1:79782343:79796005:1 transcript_biotype:protein_coding; Non-coding transcript identified by NONCODE	ENSRNOT00000018233	Pfam	1	main
451	17613870	neuro-oncological ventral antigen 2	Nova2			-0.208306	down	0.125866	6.17645	6.38476	6.2955	6.55735	6.30143	6.1916	6.05735	6.28041	292681	XM_006223310///XM_008759097	F1M4H5			GO:0051252	regulation of RNA metabolic process			GO:0003723; GO:0044822; GO:0003676	RNA binding; poly(A) RNA binding; nucleic acid binding		chr1	81075356	81126826	RefSeq; ENSEMBL	PREDICTED: Rattus norvegicus neuro-oncological ventral antigen 2 (Nova2), partial mRNA.; neuro-oncological ventral antigen 2 [gene_biotype:protein_coding transcript_biotype:protein_coding]; cdna:genscan chromosome:Rnor_6.0:1:79846989:79908737:1 transcript_biotype:protein_coding	ENSRNOT00000057965	Pfam	1	main
452	17613877	nanos homolog 2 (Drosophila)	Nanos2		Rn.218571	-0.122599	down	0.523962	5.9599	6.0825	6.24092	6.04158	5.96501	6.25974	5.88067	5.7393	365213	NM_001108908	D4A4B3	NM_001108908; ENSRNOT00000057963		GO:0006402; GO:0007283; GO:0017148; GO:0030718; GO:0045835; GO:1900153	mRNA catabolic process; spermatogenesis; negative regulation of translation; germ-line stem cell population maintenance; negative regulation of meiotic nuclear division; positive regulation of nuclear-transcribed mRNA catabolic process, deadenylation-dependent decay	GO:0000932; GO:0005634; GO:0005737; GO:0048471	cytoplasmic mRNA processing body; nucleus; cytoplasm; perinuclear region of cytoplasm	GO:0003729; GO:0008270; GO:0003723; GO:0005515	mRNA binding; zinc ion binding; RNA binding; protein binding		chr1	81155091	81156551	RefSeq; ENSEMBL; NONCODE	Rattus norvegicus nanos homolog 2 (Drosophila) (Nanos2), mRNA.; nanos homolog 2 (Drosophila) [gene_biotype:protein_coding transcript_biotype:protein_coding]; cdna:genscan chromosome:Rnor_6.0:1:79846989:79908737:1 transcript_biotype:protein_coding; Non-coding transcript identified by NONCODE	ENSRNOT00000057963	Pfam	1	main
453	17613881	Myb-related transcription factor, partner of profilin	Mypop		Rn.63885	0.138131	up	0.617214	6.61881	6.48068	6.06116	6.88196	6.49892	6.74564	6.43368	6.67711	499090	NM_001109139///XM_006228452	D4AB13; A0A0G2JUZ3	NM_001109139; XM_006228452; ENSRNOT00000019069; ENSRNOT00000078503	brain| heart| lung| pancreas| juvenile| adult	GO:0000122; GO:0006357	negative regulation of transcription from RNA polymerase II promoter; regulation of transcription from RNA polymerase II promoter	GO:0005634	nucleus	GO:0000978; GO:0001078; GO:0003677; GO:0003700; GO:0042803; GO:0003682	RNA polymerase II core promoter proximal region sequence-specific DNA binding; transcriptional repressor activity, RNA polymerase II core promoter proximal region sequence-specific binding; DNA binding; transcription factor activity, sequence-specific DNA binding; protein homodimerization activity; chromatin binding		chr1	81159192	81169783	RefSeq; ENSEMBL; NONCODE	Rattus norvegicus Myb-related transcription factor, partner of profilin (Mypop), mRNA.; PREDICTED: Rattus norvegicus Myb-related transcription factor, partner of profilin (Mypop), transcript variant X1, mRNA.; Myb-related transcription factor, partner of profilin [gene_biotype:protein_coding transcript_biotype:protein_coding]; cdna:genscan chromosome:Rnor_6.0:1:79846989:79908737:1 transcript_biot…	ENSRNOT00000019069; ENSRNOT00000078503	Pfam	1	main
454	17613887	interferon regulatory factor 2 binding protein 1	Irf2bp1		Rn.9129	0.0915257	up	0.128036	7.61334	7.52181	7.51022	7.52341	7.53181	7.70365	7.54331	7.59305	308404	NM_001107483	D4AAZ8	NM_001107483; ENSRNOT00000019075	heart| pancreas| pituitary gland| prostate| thymus| juvenile| adult			GO:0005654; GO:0016235; GO:0043231	nucleoplasm; aggresome; intracellular membrane-bounded organelle	GO:0046872; GO:0005515	metal ion binding; protein binding		chr1	81171966	81174667	RefSeq; ENSEMBL; NONCODE	Rattus norvegicus interferon regulatory factor 2 binding protein 1 (Irf2bp1), mRNA.; interferon regulatory factor 2 binding protein 1 [gene_biotype:protein_coding transcript_biotype:protein_coding]; cdna:genscan chromosome:Rnor_6.0:1:79911889:79913643:1 transcript_biotype:protein_coding; Non-coding transcript identified by NONCODE	ENSRNOT00000019075	Pfam	1	main
[truncated: 29,035 more rows]
[truncated: 6 more columns]
